# Supplementary material for: Climatic differentiation in polyploid apomictic Ranunculus auricomus complex in Europe
Source: Springer Nature journal article supplement (doi:10.1186/s12898-018-0172-1), 2018-05-21

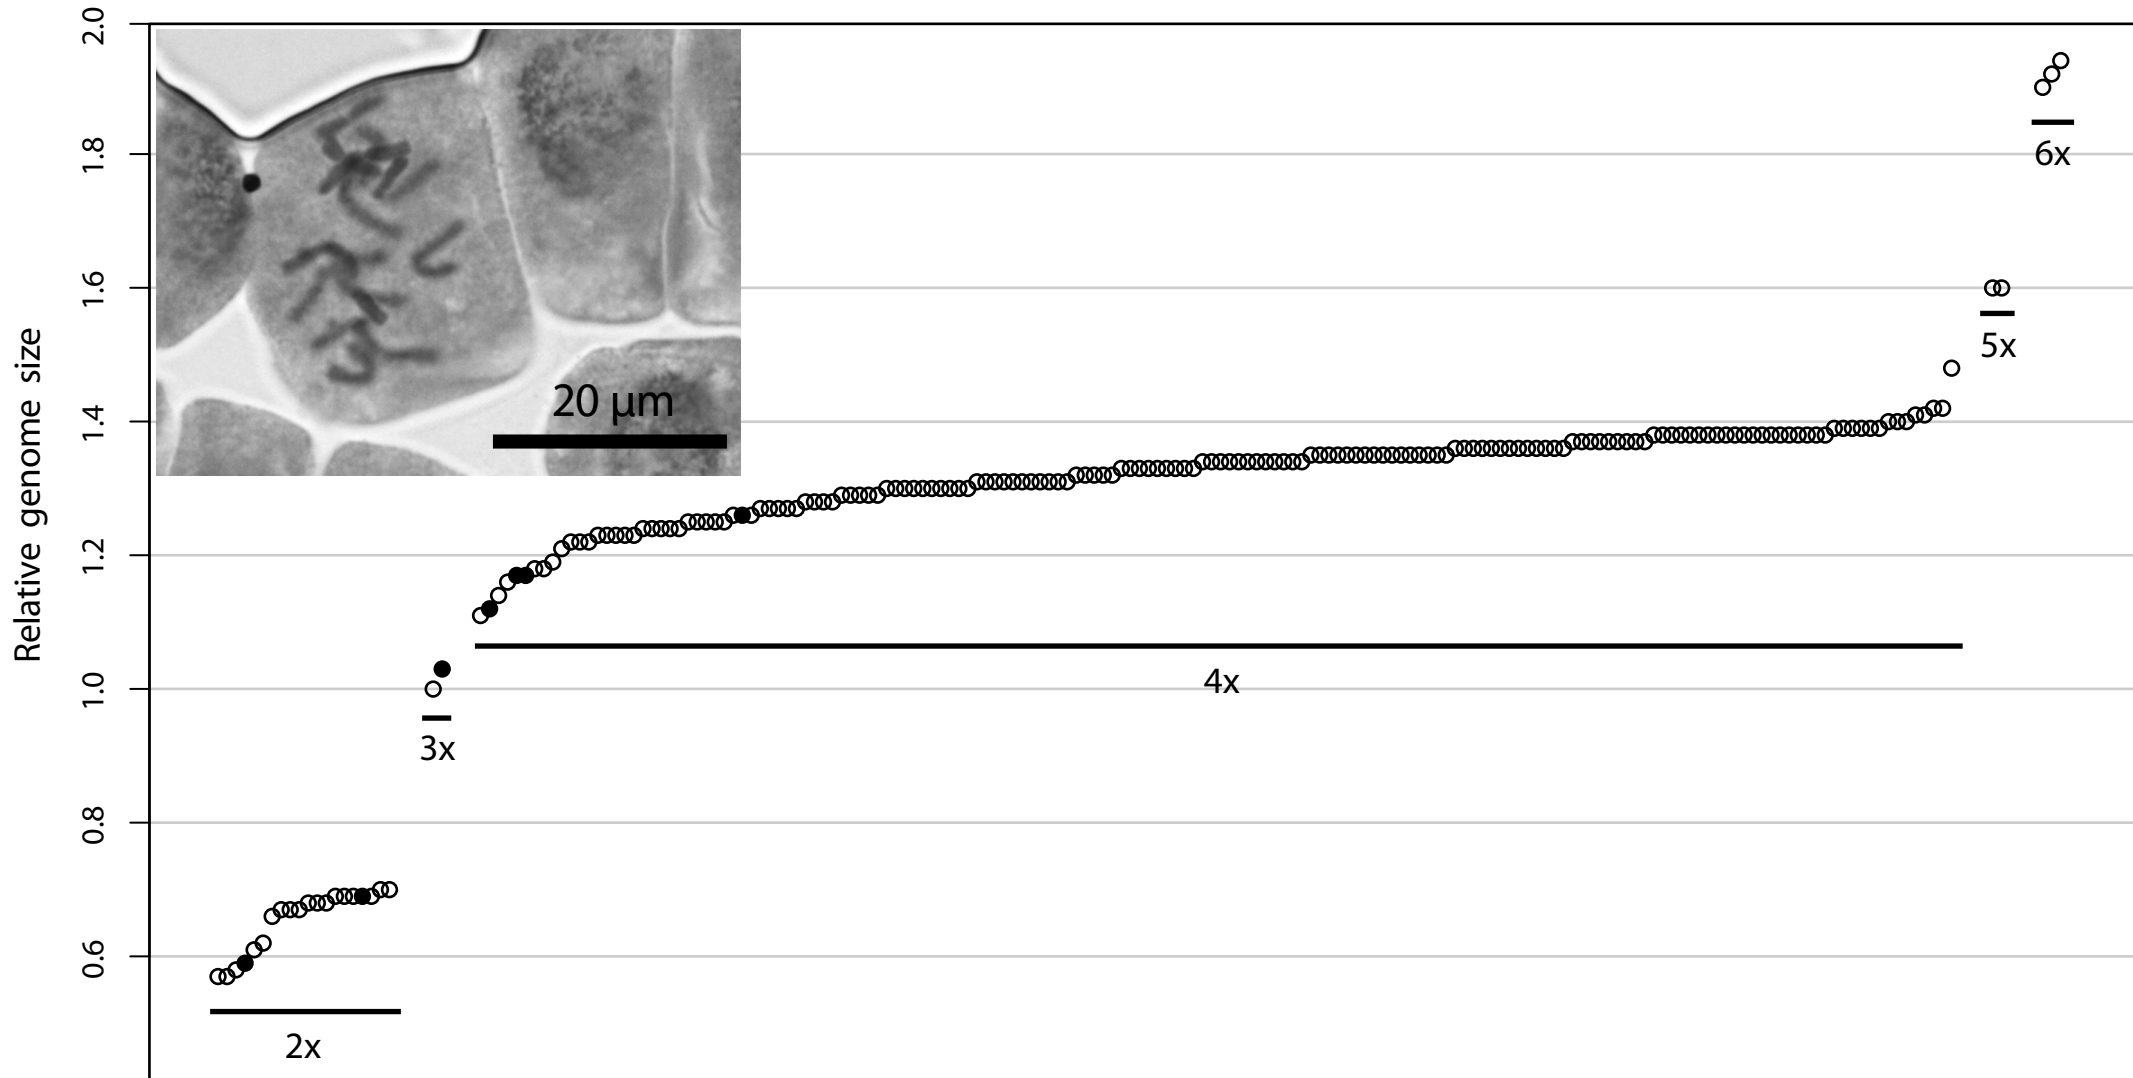

Supplement: MOESM2 [file 12898_2018_172_MOESM2_ESM.pdf]
