# Supplementary material for: Climatic differentiation in polyploid apomictic Ranunculus auricomus complex in Europe
Source: BMC Ecol. 2018 May 21;18:16. doi: 10.1186/s12898-018-0172-1 (PMC5963127; doi:10.1186/s12898-018-0172-1)
Supplement: Supplementary file 1 — Additional file 1. List of studied accessions. “Sample/standard ratio” refers to relative genome size as described in “Methods”. Group: aur—“auricomus” group, cass—“cassubicus” group, fal—“fallax” group. Sample number is identical with the collection number of the herbarium specimen. Herbarium codes follow Index Herbariorum (http://sweetgum.nybg.org/science/ih/). [file 12898_2018_172_MOESM1_ESM.xlsx]

## Sheet: StudiedMaterial
Group	Sample Number	Species	Sample/standard ratio	Ploidy	Chromosome count	Locality	Collection Date	Altitude (m)	Latitude	Longitude	Collector	Specimen deposited in Herbarium
aur	Du-29894	Ranunculus alnetorum W.Koch	1.33956	4		Spain: Castile and León, Léon, 0.6 km ESE Murias de Paredes	5.2013	1233	42.8485	-6.1846	F.G. Dunkel	Dunkel, M
aur	Du-29905	Ranunculus alnetorum W.Koch	1.34236	4		Spain: Castile and León, Léon, 1.6 km WNW de Caboalles de Abajo	5.2013	1165	42.964	-6.38385	F.G. Dunkel	Dunkel, M
aur	Du-30420	Ranunculus arcogoticus ined.	1.32716	4		Slovenia: Notranjsko-kraška, 1.3 km NW Postojna	4.2013	528	45.7803	14.2006	F.G. Dunkel	Dunkel, M
aur	Du-31061	Ranunculus argoviensis s.l.	1.3832	4		Germany: Saxony, Taucha, Forest Staditz	4.2014	128	51.4016	12.4943	F.G. Dunkel	Dunkel, M
aur	Du-30959	Ranunculus argoviensis W.Koch	1.40807	4		Germany: Baden-Württemburg, Laufenburg, Andelsbachtal	4.2014	396	47.5781	8.06758	F.G. Dunkel	Dunkel, M
aur	Du-30593	Ranunculus auricomus s.l.	1.34644	4		Germany: Mecklenburg-Western Pomerania, 1.4 km S Teschow	5.2013	12	53.7751	12.6205	F.G. Dunkel	Dunkel, M
aur	Du-31159	Ranunculus auricomus s.l.	1.47608	4		Germany: Saxony-Anhalt, Dessau, Luisium	5.2014	66	51.8516	12.2744	F.G. Dunkel	Dunkel, M
aur	Du-32334	Ranunculus auricomus s.l.	1.35142	4		Germany: Mecklenburg-Western Pomerania, Woldegk, Hinrichshager Wald	5.2014	135	53.4218	13.5103	F.G. Dunkel	Dunkel, M
aur	Du-32423	Ranunculus auricomus s.l.	1.34335	4		Germany: Mecklenburg-Western Pomerania, Sassen-Treuen, S cemetery	5.2014	30	54.0221	13.1878	F.G. Dunkel	Dunkel, M
aur	Du-32424	Ranunculus auricomus s.l.	1.3166	4		Germany: Mecklenburg-Western-Pomerania, Putbus, park of the castle	5.2014	40	54.3473	13.466	F.G. Dunkel	Dunkel, M
aur	Du-28608-1	Ranunculus austroslovenicus ined.	0.668825	2		Slovenia: Central Slovenia, 0.85 km NE Liplje	4.2012	430	14.2588	45.8495	F.G. Dunkel	Dunkel, M
aur	Du-28608-2	Ranunculus austroslovenicus ined.	0.671571	2		Slovenia: Central Slovenia, 0.85 km NE Liplje	4.2012	430	14.2588	45.8495	F.G. Dunkel	Dunkel, M
aur	Du-30441	Ranunculus austroslovenicus ined.	0.696806	2		Slovenia: Southeast Slovenia, 2.0 km W Grivac	4.2013	172	45.4625	14.817	F.G. Dunkel	Dunkel, B, LJU, M
aur	Du-30442-1	Ranunculus austroslovenicus ined.	0.686442	2	2n = 16	Slovenia: Southeast Slovenia, 0.2 km WSW Novi Ložine	4.2013	465	45.6847	14.8103	F.G. Dunkel	Dunkel, M
aur	Du-30442-2	Ranunculus austroslovenicus ined.	0.689763	2		Slovenia: Southeast Slovenia, 0.2 km WSW Novi Ložine	4.2013	465	45.6847	14.8103	F.G. Dunkel	Dunkel, M
aur	Du-30443	Ranunculus austroslovenicus ined.	0.690389	2		Slovenia: Southeastern Slovenia, 0.4 km N Mrtvice	4.2013	470	45.6771	14.8263	F.G. Dunkel	Dunkel, M
aur	Du-25764	Ranunculus beregensis Soó	1.27809	4		Hungary: Szabolcs-Szatmár-Bereg County, 4.9 km S Beregsurány	4.2011	115	48.117	22.5341	F.G. Dunkel	Dunkel, M
aur	Du-28492	Ranunculus biformis W.Koch	1.38636	4		Germany: Baden-Württemberg, 2.0 km N Wyhlen	4.2012	500	47.5669	7.6975	F.G. Dunkel	Dunkel, M
aur	Du-28483	Ranunculus boreoapenninus Pignatti	1.30895	4		France: Corse, Corse-du-Sud, 8.2 km NE Olivese	5.2012	1450	41.8674	9.15133	F.G. Dunkel	Dunkel, M
aur	Du-25381	Ranunculus bovioi Dunkel	1.29556	4		Italy: Aosta Valley, 1.4 km SSW Ayas	5.2010	1500	45.8008	7.69278	F.G. Dunkel	Dunkel, M
aur	Du-28853	Ranunculus braun-blanquetii Pignatti	1.24352	4		Slovenia: Inner Carniola-Karst, Nanos, summit	5.2012	1184	45.7666	14.05	F.G. Dunkel	Dunkel, M
aur	Du-29144	Ranunculus brunnescentoides Dunkel	1.25782	4		France: Alsace, Bas-Rhin, 3.7 km NE Valff	5.2012	153	48.4333	7.5666	F.G. Dunkel	Dunkel, M
aur	Du-29967	Ranunculus carlittensis (Sennen) Grau	1.34619	4		Spain: Aragonia, Huesca, 0.4 km E Laspaúles	5.2013	1435	42.4713	0.6036	F.G. Dunkel	Dunkel, M
aur	Du-29986	Ranunculus carlittensis (Sennen) Grau	1.34762	4		France: Languedoc-Roussillon, Pyrénées-Orientales, 7.0 km NW Latour-de-Carol	5.2013	1460	42.5086	1.83142	F.G. Dunkel	Dunkel, M
aur	Du-29989	Ranunculus carlittensis (Sennen) Grau	1.3626	4		Andorre: 1.0 km SE Andorra La Vella	5.2013	1330	42.4999	1.53095	F.G. Dunkel	Dunkel, M
aur	Du-16391	Ranunculus chasii Dunkel	1.37687	4		France: Provence-Alpes-Côte d'Azur, Alpes-de-Haute-Provence, 4.9 km ENE Curel (locus typi)	5.2007	960	44.2129	5.69962	F.G. Dunkel	Dunkel, M
aur	Du-22900	Ranunculus dactylophyllus Borch.-Kolb	1.25309	4		Germany: Bavaria, Wenzenhausen	5.2014	348	49.0693	12.1758	F.G. Dunkel	Dunkel, M
aur	Du-27984	Ranunculus degenii Kümmerle & Jáv.	1.30061	4		Macedonia: Korab, 8.3 km NW Nichpur	6.2012	1828	41.7943	20.5977	F.G. Dunkel	Dunkel, M
aur	Du-30445	Ranunculus delvosallei (Demarsin) Ericsson	1.37305	4		Belgium: Wallonia, Hainaut, 1.7 km SE Havré (locus typi)	4.2013	130	50.45	4.05778	F.G. Dunkel	Dunkel, M
aur	Du-28683	Ranunculus demarsinii Ericsson	1.39713	4		Belgium: Wallonia, Namur, 0.5 km WNW Hastière	4.2012	118	50.2008	4.81028	F.G. Dunkel	Dunkel, M
aur	Du-12510-1	Ranunculus digitatifolius Jasiewicz	1.24696	4		Poland: Lesser Poland Voivodeship, 9.6 km NNW Miechów	5.2006	380	50.4354	19.9831	F.G. Dunkel	Dunkel, M
aur	Du-12510-2	Ranunculus digitatifolius Jasiewicz	1.23927	4		Poland: Lesser Poland Voivodeship, 9.6 km NNW Miechów	5.2006	380	50.4354	19.9831	F.G. Dunkel	Dunkel, M
aur	Du-30545	Ranunculus dolichodon ined.	1.40888	4		Germany: Saxony,1.8 km SO Hochkirch	5.2013	262	51.1398	14.5913	F.G. Dunkel	Dunkel, M
aur	Du-30536	Ranunculus elephantotis ined.	1.37851	4		Germany: Leipzig, Mühlenpark	5.2013	114	51.2966	12.3292	F.G. Dunkel	Dunkel, M
aur	Du-29983	Ranunculus envalirensis Grau	0.698386	2		Andorre: 0.6 km N Soldeu	5.2013	1750	42.5815	1.66295	F.G. Dunkel	Dunkel, M
aur	Du-29988	Ranunculus envalirensis Grau	0.687485	2		France: Languedoc-Roussillon, Pyrénées-Orientales, 1.2 km WSW Eyne	5.2013	1600	42.464	2.07487	F.G. Dunkel	Dunkel, M
aur	Du-25968	Ranunculus geissertii R. Engel ex Dunkel	1.42051	4		France: Alsace, Rhin-Bas, 1.0 km N Forstfeld	4.2010	117	48.8671	8.03708	F.G. Dunkel	Dunkel, M
aur	Du-32645	Ranunculus genevensis ined.	1.35456	4		France: Rhône-Alpes, Isère, Optevoz	4.2015	300	45.7552	5.34447	F.G. Dunkel	Dunkel, M
aur	Du-32802	Ranunculus genevensis ined.	1.39406	4		France: Rhône-Alpes, Haute-Savoie, 1.8 km NNE La Joux	4.2013	403	46.1386	5.98684	F.G. Dunkel	Dunkel, M
aur	Du-28563	Ranunculus glechomus ined.	0.676619	2		Slovenia: Central Slovenia, 0.9 km SW Grosuplje	4.2012	324	45.95	14.6501	F.G. Dunkel	Dunkel, M
aur	Du-30419	Ranunculus gortanii Pignatti	1.33243	4		Slovenia: Notranjsko-kraška, 1.3 km NW Postojna	4.2013	528	45.7803	14.2006	F.G. Dunkel	Dunkel, M
aur	Du-29960	Ranunculus guaraensis ined.	1.34435	4		Spain: Aragonia, Huesca, 5.6 km ENE Nocito	5.2013	1448	42.3053	-0.189183	F.G. Dunkel	Dunkel, M
aur	Du-28555	Ranunculus guttei ined.	1.37851	4		Germany: Rhineland-Palatinate, 0.6 km SW Liersberg	4.2012	200	49.7197	6.52833	F.G. Dunkel	Dunkel, M
aur	Du-31080	Ranunculus guttei ined.	1.36566	4		Germany: Saxony, Leipzig, Klingerhain	5.2013	115	51.3329	12.3502	F.G. Dunkel	Dunkel, M
aur	Du-31181	Ranunculus guttei ined.	1.36405	4		Germany: Saxony, Leipzig-Gundorf, Forest Kanitzsch	5.2014	113	51.3686	12.2468	F.G. Dunkel	Dunkel, M
aur	Du-28681	Ranunculus hannonianus (Demarsin) Ericsson	1.34996	4		Belgium: Wallonia, Hainaut, 1.0 km NNW Jemappes	4.2012	41	50.4554	3.89102	F.G. Dunkel	Dunkel, M
aur	Du-30596	Ranunculus hevellus (Hülsen ex Asch. & Graebn.) Hülsen ex O. Schwarz	1.33074	4		Germany: Lower Saxony, 0.4 km NNE Lachtehausen	5.2013	38	52.6261	10.1311	F.G. Dunkel	Dunkel, M
aur	Du-27617	Ranunculus hortobagyianus Soó	1.2742	4		Hungary: Szabolcs-Szatmár-Bereg county, 1.4 km SE Batorliget (locus typi)	4.2011	134	47.7423	22.2674	F.G. Dunkel	Dunkel, M
aur	Du-30999	Ranunculus indecorus group	1.26744	4		Germany: Saxony, Hainewalde, Roschertal	4.2014	279	50.9239	14.7379	F.G. Dunkel	Dunkel, M
aur	Du-31606-1	Ranunculus integerrimus (Julin) Borch.-Kolb	1.24088	4		Germany: Bavaria, 1.8 km NNE Rosshaupten	6.2005	809	47.6678	10.7301	F.G. Dunkel	Dunkel, M
aur	Du-31606-2	Ranunculus integerrimus (Julin) Borch.-Kolb	1.23759	4		Germany: Bavaria, 1.8 km NNE Rosshaupten	6.2005	809	47.6678	10.7301	F.G. Dunkel	Dunkel, M
aur	Du-30466	Ranunculus irregularioides ined.	1.37521	4		Belgium: Wallonia, Namur, 1.0 km E Romedenne	4.2013	184	50.1714	4.68417	F.G. Dunkel	Dunkel, M
aur	Du-30437	Ranunculus irregularoides ined.	1.38207	4		Belgium: Wallonia, Namur, 1.6 km N Wépion	4.2013	138	50.4353	4.85996	F.G. Dunkel	Dunkel, M
aur	Du-31313-1	Ranunculus islandicus (Fagerstr. & G.Kvist ) Ericsson	1.36101	4		Iceland: Western Iceland, Budir, N of Hraunhöfn	6.2014	47	64.8417	-23.4157	F.G. Dunkel	Dunkel, M
aur	Du-31313-2	Ranunculus islandicus (Fagerstr. & G.Kvist ) Ericsson	1.35714	4		Iceland: Western Iceland, Budir, N of Hraunhöfn	6.2014	47	64.8417	-23.4157	F.G. Dunkel	Dunkel, M
aur	Du-31383-1	Ranunculus islandicus (Fagerstr. & G.Kvist ) Ericsson	1.35326	4		Iceland: North Iceland, Torfnafjall Fljótum	6.2014	400	66.1266	-19.0366	F.G. Dunkel	Dunkel, M
aur	Du-31383-2	Ranunculus islandicus (Fagerstr. & G.Kvist ) Ericsson	1.34928	4		Iceland: North Iceland, Torfnafjall Fljótum	6.2014	400	66.1266	-19.0366	F.G. Dunkel	Dunkel, M
aur	Du-31384	Ranunculus islandicus (Fagerstr. & G.Kvist ) Ericsson	1.27043	4		Iceland: North Iceland, Akureyri, Botanical Garden	6.2014	48	65.675	-18.092	F.G. Dunkel	Dunkel, M
aur	Du-32801	Ranunculus karlovacensis ined.	1.37639	4		Croatia: Karlovac, E Gornje Mekušje	4.2015	115	45.4811	15.5933	F.G. Dunkel & S. Wittwer	Dunkel, M
aur	Du-30617	Ranunculus kiesewetteri ined.	1.32653	4		Germany: Mecklenburg-Western Pomerania, Stralsund, Richtenberger Chaussee	5.2013	3	54.2972	13.0589	F.G. Dunkel	Dunkel, M
aur	Du-31009	Ranunculus kiesewetteri ined.	1.35431	4		Germany: Mecklenburg-Western Pomerania, Abtshagen, Windebrak	5.2014	20	54.0286	13.0294	F.G. Dunkel	Dunkel, M
aur	Du-32600	Ranunculus kiesewetteri ined.	1.33296	4		Germany: Mecklenburg-Western Pomerania, Stralsund, Richtenberger Chaussee	5.2014	22	54.2908	13.0532	F.G. Dunkel	Dunkel, M
aur	Du-30926	Ranunculus loganus ined.	1.38375	4		Germany: Hesse, Runkel-Steeden	4.2014	132	50.4064	8.13856	F.G. Dunkel	Dunkel, M
aur	Du-32373	Ranunculus luluensis ined.	1.36723	4		Germany: Mecklenburg-Western Pomerania, Woldegk, Göhrener Chaussee	5.2014	112	53.4515	13.5818	F.G. Dunkel	Dunkel, M
aur	Du-30957	Ranunculus lunaris Brodtb.	1.38548	4		Germany: Baden-Württemberg, Weil a. Rhein, Mooswald	4.2014	277	47.59	7.61111	F.G. Dunkel	Dunkel, M
aur	Du-31088	Ranunculus lyratosimilis ined.	1.92168	6		Germany: Saxony, Leipzig, Klingerhain	4.2014	113	51.3335	12.3501	F.G. Dunkel	Dunkel, M
aur	Du-30958	Ranunculus macrotis Brodtb.	1.3687	4		Germany: Baden-Württemberg, Weil a. Rhein, Mooswald	4.2014	277	47.59	7.61111	F.G. Dunkel	Dunkel, M
aur	Du-27745	Ranunculus magniflorus ined.	1.30035	4		Romania: Cluj County, Cluj-Napoca, 1.3 km NNE Ciurila	4.2011	730	46.6621	23.5501	F.G. Dunkel	Dunkel, M
aur	Du-30471	Ranunculus mariamontis ined.	1.37245	4		Belgium: Wallonia, Hainaut, 1.6 km SE Jolimont	4.2013	99	50.4594	4.235	F.G. Dunkel	Dunkel, M
aur	Du-23722	Ranunculus marsicus Guss. & Ten.	1.30481	4		Italy: Abruzzo, L´Aquila, 2,6 km E Cocullo	5.2007	1390	42.0331	13.8055	F.G. Dunkel	Dunkel, M
aur	Du-23724	Ranunculus marsicus Guss. & Ten. var. incisior Dunkel	1	3		Italy: Abruzzo, L´Aquila, 1.8 km E Pescocostanzo	5.2009	1250	41.8871	14.0871	F.G. Dunkel	Dunkel, M
aur	Du-28639	Ranunculus mediocompositus ined.	0.689098	2		Slovenia: Central Slovenia, 0,7 km NE Liplje	4.2010	425	45.8484	14.2575	F.G. Dunkel	Dunkel, B, LJU, M
aur	Du-30551	Ranunculus medioformis ined.	1.31266	4		Germany: Saxony, Leipzig, Clara-Zetkin-Park	4.2014	112	51.3318	12.3525	F.G. Dunkel	Dunkel, M
aur	Du-31091	Ranunculus medioformis ined.	1.36104	4		Germany: Saxony, Leipzig, Clara-Zetkin-Park	5.2013	115	51.3502	12.3288	F.G. Dunkel	Dunkel, M
aur	Du-30867-1	Ranunculus mediopositus ined.	1.38237	4		Germany: Hesse, Messel	4.2014	159	49.9419	8.78328	F.G. Dunkel	Dunkel, M
aur	Du-30867-2	Ranunculus mediopositus ined.	1.38307	4		Germany: Hesse, Messel	4.2014	159	49.9419	8.78328	F.G. Dunkel	Dunkel, M
aur	Du-30809	Ranunculus megacarpoides ined.	1.3593	4		Germany: Thuringia, S Reinhards	4.2014	498	50.6343	9.88705	F.G. Dunkel	Dunkel, M
aur	Du-31050	Ranunculus misniensis ined.	1.34858	4		Germany: Saxony, Gröbern, Roitschenberg	4.2014	147	51.1831	13.5132	F.G. Dunkel	Dunkel, M
aur	Du-30699	Ranunculus moellenhagensis ined.	1.35955	4		Germany: Mecklenburg-Western Pomerania, 0.25 km WNW Varchentin Castle (loc. Du-56)	5.2013	39	53.5833	12.8557	F.G. Dunkel	Dunkel, M
aur	Du-29912	Ranunculus monserratiisimilis ined.	1.34902	4		Spain: Castile and León, Léon, 0.9 km S Prioro	5.2013	1081	42.8856	-4.96525	F.G. Dunkel	Dunkel, M
aur	Du-27537	Ranunculus monticola (Demarsin) Ericsson	1.37924	4		Belgium: Flanders, Limburg, 0.7 km N Petit Lanaye	4.2011	100	50.8117	5.69087	F.G. Dunkel	Dunkel, M
aur	Du-29911	Ranunculus montserratii Grau	1.37816	4		Spain: Castile and León, Léon, 2.5 km SW Siero de la Reina	5.2013	1273	42.9272	-4.92403	F.G. Dunkel	Dunkel, M
aur	Du-28505	Ranunculus mosellanus Dunkel	1.37965	4		Germany: Rhineland-Palatinate, 0.6 km NE Mülheim/Mosel	4.2012	202	49.9144	7.01694	F.G. Dunkel	Dunkel, M
aur	Du-31033	Ranunculus nissanus ined.	1.35248	4		Germany: Saxony, Rothenburg O.L., "Paradise"	4.2014	151	51.3407	14.9727	F.G. Dunkel	Dunkel, M
aur	Du-20574	Ranunculus pedemontanus Dunkel	1.2961	4		Italy: Piedmont, Vercelli, 3.0 km NE Quarona	5.2009	680	45.7819	8.2922	F.G. Dunkel	Dunkel, M
aur	Du-19769	Ranunculus pedrottii Dunkel	1.93792	6		Italy: Umbria, Perugia, 2.1 km SSE Castelluccio	5.2007	1340	42.8471	13.2002	F.G. Dunkel	Dunkel, M
aur	Du-28672	Ranunculus peracris ined.	0.673416	2		Slovenia: Southeast Slovenia, 1.4 km NW Vraški Brod	4.2012	150	45.8805	15.3361	F.G. Dunkel	Dunkel, M
aur	Du-30446	Ranunculus peracris ined.	0.657713	2		Slovenia: Southeast Slovenia, 1.6 km S Gajma	4.2013	153	45.8912	15.3705	F.G. Dunkel	Dunkel, B, LJU, M
aur	Du-30526	Ranunculus perfissus ined.	1.32776	4		Slovenia: Notranjsko-kraška, 1.3 km NW Postojna	4.2013	528	45.7803	14.2006	F.G. Dunkel	Dunkel, M
aur	Du-28680	Ranunculus phragmiteti Haas	1.31343	4		Slovenia: Central Slovenia, 1.4 km NW Podpeč	4.2012	292	45.9818	14.4056	F.G. Dunkel	Dunkel, M
aur	Du-30575	Ranunculus phragmiteti Haas	1.30173	4		Germany: Saxonia, 1.3 km NW Eschdorf	4.2013	271	51.0418	13.9333	F.G. Dunkel	Dunkel, M
aur	Du-31084	Ranunculus phragmiteti Haas	1.29533	4		Germany: Bavaria, Großlangheim, Kranzer	4.2014	223	49.763	10.2459	F.G. Dunkel	Dunkel, M
aur	Du-28610	Ranunculus phragmiteti s.l.	1.26989	4		Slovenia: Central Slovenia, 0.5 km E Liplje	4.2012	425	45.8458	14.2555	F.G. Dunkel	Dunkel, M
aur	Du-30786	Ranunculus phragmiteti s.l.	1.25112	4		Germany: Saxony, Altenberg, Geisingberg	6.2014	733	50.7741	13.7707	F.G. Dunkel	Dunkel, M
aur	Du-31098	Ranunculus phragmiteti s.l.	1.31989	4		Germany: Bavaria, Rhön, Haselbachtal	4.2014	455	50.3911	10.0123	F.G. Dunkel	Dunkel, M
aur	Du-30981-1	Ranunculus phragmitetiminor ined.	1.27868	4		Germany: Saxony, Löbau, Löbauer Berg	4.2014	413	51.0903	14.6899	F.G. Dunkel	Dunkel, M
aur	Du-30981-2	Ranunculus phragmitetiminor ined.	1.27997	4		Germany: Saxony, Löbau, Löbauer Berg	4.2014	413	51.0903	14.6899	F.G. Dunkel	Dunkel, M
aur	Du-30530	Ranunculus pillnitzensis ined.	1.35479	4		Germany: Saxony, Dresden, 0.35 km N Pillnitz Castle	5.2013	127	51.0112	13.8722	F.G. Dunkel	Dunkel, M
aur	Du-31042	Ranunculus pillnitzensis ined.	1.36809	4		Germany: Saxony, Pillnitz, close to the ferry Kleinzschachnitz-Pillnitz	4.2014	116	51.0116	13.8643	F.G. Dunkel	Dunkel, M
aur	Du-26710	Ranunculus pindicola Dunkel	1.29006	4		Greece: Epirus, Ioannina, 2.6 km NW Metsovo	6.2011	1335	39.7833	21.1586	F.G. Dunkel	Dunkel, M
aur	Du-28676	Ranunculus pleiophyllus Dunkel	1.39088	4		Belgium: Wallonia, Hainaut, 0.7 km SSW Mesvin	4.2012	74	50.4194	3.95558	F.G. Dunkel	Dunkel, M
aur	Du-30669	Ranunculus potthagensis ined.	1.36822	4		Germany: Mecklenburg-Western Pomerania, 3.6 km SW Guest	5.2013	39	54.0308	13.4038	F.G. Dunkel	Dunkel, M
aur	Du-29578	Ranunculus praepomeranicus ined.	1.33665	4		Germany: Mecklenburg-Western Pomerania, 1.6 km SO Rehna	5.2012	93	53.773	11.0742	F.G. Dunkel	Dunkel, M
aur	Du-32597	Ranunculus praepomeranicus ined.	1.31381	4		Germany: Mecklenburg-Western-Pomerania, Graal-Müritz	5.2014	0	54.2436	12.245	F.G. Dunkel	Dunkel, M
aur	Du-10862	Ranunculus prosseri Dunkel	1.18615	4		Italy: Trentino-South Tyrol, Trento, 2.6 km NW Mezzolombardo	4.2007	310	46.2278	11.0707	F.G. Dunkel	Dunkel, M
aur	Du-28500	Ranunculus pseudargoviensis ined.	1.31341	4		France: Alsace, Haut-Rhin, 1.3 km SW Andolsheim	4.2012	191	48.066	7.38682	F.G. Dunkel	Dunkel, M
aur	Du-31187	Ranunculus pseudobtusulus ined.	1.33157	4		Germany: Mecklenburg-Western Pomerania, Kasevitz, E of cemetery	5.2014	13	54.3398	13.4139	F.G. Dunkel	Dunkel, M
aur	Du-31075	Ranunculus pseudolyratus ined.	1.37867	4		Germany: Saxony, Taucha, Forest Staditz	4.2014	121	51.3988	12.4898	F.G. Dunkel	Dunkel, M
aur	Du-28784	Ranunculus pseudopimus O. Schwarz	1.32888	4		Germany: Thuringia, Weimar, Historic cimetery, Fürstengruft	4.2012	244	50.9724	11.3258	F.G. Dunkel	Dunkel, M
aur	Du-29582	Ranunculus pseudopomeranicus ined.	1.30766	4		Germany: Mecklenburg-Western Pomerania, 1.2 km W Kirch-Grambow	5.2012	33	53.7682	11.1025	F.G. Dunkel	Dunkel, M
aur	Du-32598	Ranunculus pseudopomeranicus ined.	1.29303	4		Germany: Mecklenburg-Western Pomerania, Graal-Müritz	5.2014	2	54.2431	12.2445	F.G. Dunkel	Dunkel, M
aur	Du-30416	Ranunculus puberulus W.Koch	1.36191	4		Germany: Baden-Württemberg, 1.5 km ESE Hilzingen	5.2013	475	47.7605	8.80323	F.G. Dunkel	Dunkel, M
aur	Du-29604	Ranunculus rastetteri ined.	1.36111	4		France: Alsace, Hinsingen	4.2014	220	48.9479	6.98928	F.G. Dunkel	Dunkel, M
aur	Du-25394	Ranunculus ratisbonensis Dunkel	1.36057	4		Germany: Bavaria, Regensburg, Dörnbergpark	5.2014	347	49.0151	12.0854	F.G. Dunkel	Dunkel, M
aur	Du-16543	Ranunculus recticaulis Hörandl & Gutermann	1.29051	4		Germany: Bavaria, 2,0 km WNW Binswangen	5.2006	424	48.5597	10.6124	F.G. Dunkel	Dunkel, M
aur	Du-30684	Ranunculus rotundatissimus ined.	1.34388	4		Germany: Mecklenburg-Western Pomerania, 0.4 km W Varchentin Castle (loc. Du-55)	5.2013	39	53.583	12.8537	F.G. Dunkel	Dunkel, M
aur	Du-31011	Ranunculus rugensis ined.	1.33938	4		Germany: Mecklenburg-Western Pomerania, Udars, Gutshof	5.2014	5	54.517	13.2076	F.G. Dunkel	Dunkel, M
aur	Du-23704	Ranunculus silanus Pignatti	1.33976	4		Italy: Calabria, 2.1 km NE Ciricilla	5.2009	1380	39.1489	16.5556	F.G. Dunkel	Dunkel, M
aur	Du-31096	Ranunculus sorviodurus Dunkel	1.35584	4		Germany: Bavaria, Rainer Wald	4.2014	330	48.9111	12.4524	F.G. Dunkel	Dunkel, M
aur	Du-23438	Ranunculus sparsipubescens (Demarsin) Ericsson	1.38043	4		Belgium: Wallonia, Namur, 1.4 km S Anseremme	4.2010	135	50.2259	4.9048	F.G. Dunkel	Dunkel, M
aur	Du-16114	Ranunculus sphinx Brodtb.	1.41791	4		France: Alsace, Rhin-Haut, 0.5 km WNW Richardshäuser	4.2009	245	47.6472	7.5031	F.G. Dunkel	Dunkel, M
aur	Du-30920	Ranunculus stellaris Brodtb.	1.37988	4		France: Alsace, Hochfelden	4.2014	182	48.7723	7.60814	F.G. Dunkel	Dunkel, M
aur	Du-28566	Ranunculus subcarniolicus ined.	0.675347	2		Slovenia: Central Slovenia, 1.2 km SSW Grosuplje	4.2012	324	45.9453	14.6519	F.G. Dunkel	Dunkel, M
aur	Du-28640	Ranunculus subcarniolicus ined.	0.682017	2		Slovenia: Central Slovenia, 0,7 km NE Liplje	4.2010	425	45.8484	14.2575	F.G. Dunkel	Dunkel, M
aur	Du-30922	Ranunculus subglechomoides Dunkel	1.36333	4		France: Alsace, Hochfelden	4.2014	182	48.7723	7.60814	F.G. Dunkel	Dunkel, M
aur	Du-31203-1	Ranunculus subtratricus Jasiewicz	1.23103	4		Poland: Lesser Poland Voivodeship, Zakopane, Wiżna Kira Miętusa	5.2014	946	49.2693	19.8689	F.G. Dunkel	Dunkel, M
aur	Du-31203-2	Ranunculus subtratricus Jasiewicz	1.21988	4		Poland: Lesser Poland Voivodeship, Zakopane, Wiżna Kira Miętusa	5.2014	946	49.2693	19.8689	F.G. Dunkel	Dunkel, M
aur	Du-30568	Ranunculus trilobatoides ined.	1.31788	4		Germany: Saxony, Leipzig, Clara-Zetkin-Park	4.2013	116	51.1799	12.3495	F.G. Dunkel	Dunkel, M
aur	Du-31003	Ranunculus trisegmentus ined.	1.27179	4		Germany: Saxony, Cortta, Cottaer Spitzberg	4.2014	358	50.8991	13.9704	F.G. Dunkel	Dunkel, M
aur	Du-15637	Ranunculus valdesii Grau	1.34276	4		Spain: Madrid, 0.9 km NW Rascafría (locus typi)	4.2006	1215	40.9085	-3.88932	F.G. Dunkel	Dunkel, M
aur	Du-29922	Ranunculus valdesii Grau	1.3409	4		Spain: Madrid, 0.9 km NE Rascafría	5.2013	1135	40.9102	-3.87133	F.G. Dunkel	Dunkel, M
aur	Du-29927	Ranunculus valdesii Grau	1.33775	4		Spain: Madrid, 0.9 km NW Rascafría	5.2013	1210	40.9084	-3.88935	F.G. Dunkel	Dunkel, M
aur	Du-30435	Ranunculus vandenbroeckii ined.	1.37465	4		Belgium: Wallonia, Namur, 0.5 km N Sautour	4.2013	250	50.1744	4.56055	F.G. Dunkel	Dunkel, M
aur	Du-25794	Ranunculus variabiliformis ined.	1.26269	4		Romania: Caraș-Severin County, 5 km NW Oraviţa	4.2010	130	45.0668	21.6366	F.G. Dunkel	Dunkel, M
aur	Du-11013	Ranunculus variabilis Hörandl & Gutermann	1.22934	4		Italy: Trentino-South Tyrol, South Tyrol, 0.5 km Karthaus	5.2004	1235	46.7039	10.9143	F.G. Dunkel	Dunkel, M
aur	Du-30529	Ranunculus variabilis Hörandl & Gutermann	1.31039	4		Slovenia: Central Slovenia, Ljubljana, 4.0 km E Dobrova	4.2013	298	46.0532	14.4664	F.G. Dunkel	Dunkel, M
aur	Du-31052	Ranunculus vertumnalis O.Schwarz	1.34599	4		Germany: Mecklenburg-Western Pomerania, Rambin, Kirchhof	5.2014	8	54.3547	13.204	F.G. Dunkel	Dunkel, M
aur	Du-32594	Ranunculus vertumnalis s.l.	1.35425	4		Germany: Mecklenburg-Western Pomerania, Schwaan	5.2014	11	53.9374	12.119	F.G. Dunkel	Dunkel, M
aur	Du-16143	Ranunculus walo-kochii Hörandl & Gutermann	1.39529	4		Switzerland: canton Zürich, 1.5 km SE Rümlang (locus typi)	5.2006	420	47.4414	8.54516	F.G. Dunkel	Dunkel, M
cass	Du-28883-1	Ranunculus allemannii Braun-Blanq.	1.29988	4		Slovenia: Upper Carniola, 1.7 km NW Goreljek	5.2012	1268	46.3384	13.9619	F.G. Dunkel	Dunkel, M
cass	Du-28883-2	Ranunculus allemannii Braun-Blanq.	1.59602	5		Slovenia: Upper Carniola, 1.7 km NW Goreljek	5.2012	1268	46.3384	13.9618	F.G. Dunkel	Dunkel, M
cass	Du-28883-3	Ranunculus allemannii Braun-Blanq.	1.6036	5		Slovenia: Upper Carniola, 1.7 km NW Goreljek	5.2012	1268	46.3384	13.9618	F.G. Dunkel	Dunkel, M
cass	Du-27650	Ranunculus apertus ined.	1.22019	4		Slovakia: Košice Region, Var-hegy 5.0 km NNW Košice	4.2011	410	48.7616	21.2306	F.G. Dunkel	Dunkel, M
cass	Du-28914	Ranunculus braun-blanquetii Pignatti	1.23077	4		Slovenia: Savinjska, 3,2 km W Luče ob Savinji	7.2012	1600	46.3537	14.6976	F.G. Dunkel	Dunkel, M
cass	Du-12534	Ranunculus carpaticola Soó	1.39112	4		Slovakia: Žilina Region, Oravský hrad 2.2 km NNE Široká	5.2005	550	49.2617	19.3558	F.G. Dunkel	Dunkel, M
cass	Du-27628	Ranunculus carpaticola Soó	1.2796	4		Ukraine: Transcarpatia, Var-hegy 1.9 km S Huszt	4.2011	175	48.1617	23.0933	F.G. Dunkel	Dunkel, M
cass	Du-27660-1	Ranunculus carpaticola Soó	0.593822	2	2n = 16	Slovakia: Banská Bystrica Region, 1.0 km NW Revúca (locus lectotypi)	4.2011	350	48.6892	20.1246	F.G. Dunkel	Dunkel, M
cass	Du-27660-2	Ranunculus carpaticola Soó	0.573172	2		Slovakia: Banská Bystrica Region, 1.0 km NW Revúca (locus lectotypi)	4.2011	350	48.6892	20.1246	F.G. Dunkel	Dunkel, M
cass	Du-20790-1	Ranunculus cassubicifolius W.Koch	0.57662	2		Hungary: Borsod-Abaúj-Zemplén county, 8.3 km WNW Miskolc	4.2011	230	48.1141	20.653	F.G. Dunkel	Dunkel, M
cass	Du-20790-2	Ranunculus cassubicifolius W.Koch	1.17705	4		Hungary: Borsod-Abaúj-Zemplén county, 8.3 km WNW Miskolc	4.2011	230	48.1141	20.653	F.G. Dunkel	Dunkel, M
cass	Du-28653	Ranunculus cassubicifolius W.Koch	0.624826	2		Slovenia: Upper Carniola, 3,5 km S Žiri	4.2012	510	46.0109	14.1039	F.G. Dunkel	Dunkel, M
cass	Du-28673	Ranunculus cassubicifolius W.Koch	0.61417	2		Slovenia: Central Slovenia, 3.9 km N Stahovica	5.2012	515	46.3033	14.6077	F.G. Dunkel	Dunkel, M
cass	Du-21045	Ranunculus cassubiciformis Soó	1.12	4	2n = ca. 32	Slovakia: Košice Region, Čermel-Tal 5.3 km NW Košice (locus typi)	4.2008	300	48.7519	21.2027	F.G. Dunkel	Dunkel, M
cass	Du-21047	Ranunculus cassubicus s.l.	0.573151	2		Hungary: Borsod-Abaúj-Zemplén county, 8.3 km WNW Miskolc	4.2011	230	48.1141	20.653	F.G. Dunkel	Dunkel, M
cass	Du-30560	Ranunculus cassubicus s.l.	1.15795	4		Russia: Leningrad Oblast, Puschkin, 25 km S Saint Petersburg	8.2012	72	59.8833	30.4	F.G. Dunkel	Dunkel, M
cass	Du-31229	Ranunculus hannae Jasiewicz	1.35486	4		Poland: Lesser Poland Voivodeship, Klonów close to Miechów	5.2014	273	50.3395	20.1576	F.G. Dunkel	Dunkel, M
cass	Du-31114	Ranunculus kobendzae ined.	1.18316	4		Poland: Warszawa, western edge of Reserve "Debina"	5.2014	108	52.3983	21.3781	F.G. Dunkel	Dunkel, M
cass	Du-31232	Ranunculus marginicola Jasiewicz	1.37447	4		Poland: Lesser Poland Voivodeship, Klonów close to Miechów	5.2014	271	50.332	20.1867	F.G. Dunkel	Dunkel, M
cass	Du-31126	Ranunculus mazovicus ined.	1.11406	4		Poland: Mazowieckie Voivodeship, Żyrardów County, Podlasie	5.2014	133	52.0371	20.5165	F.G. Dunkel	Dunkel, M
cass	Du-31222	Ranunculus niepolomicensis Jasiewicz	1.38029	4		Poland: Lesser Poland Voivodeship, Klonów close to Miechów	5.2014	265	50.3374	20.1648	F.G. Dunkel	Dunkel, M
cass	Du-12533	Ranunculus pawlowskii Jasiewicz	1.16795	4	2n = 32	Poland: Lesser Poland Voivodeship, 1.3 km S Biskupice	4.2005	350	49.9515	20.1191	F.G. Dunkel	Dunkel, M
cass	Du-27054	Ranunculus tranzschelii (Fagerstr.) Ericsson	1.14385	4		Russia: Leningrad Oblast, Puschkin, 25 km S Saint Petersburg	8.2012	72	59.8833	30.4	F.G. Dunkel	Dunkel, M
fal	Du-28796	Ranunculus aff. kujalae (Fagerstr.) Ericsson	1.22575	4		Russia: Leningrad Oblast, Petergof 29 km W Saint Petersburg	8.2011	25	59.8833	29.8833	F.G. Dunkel	Dunkel, M
fal	Du-25814	Ranunculus bernatskyanus Soó	1.3442	4		Romania: Caraș-Severin County, 1.4 km E Ciclova montană	4.2011	350	45.0277	21.7542	F.G. Dunkel	Dunkel, M
fal	Du-27746	Ranunculus biskupicensis ined.	1.28908	4		Poland: Lower Silesian Voivodeship, 6.4 km W Mirków	4.2012	114	51.1623	17.0797	F.G. Dunkel	Dunkel, M
fal	Du-27611	Ranunculus buekkensis Soó	1.28925	4		Hungary: Borsod-Abaúj-Zemplén county, Bankút, 9.9 km W Lillafüred	4.2011	900	48.1141	20.4789	F.G. Dunkel	Dunkel, M
fal	Du-27980	Ranunculus doerrii Borch.-Kolb	1.23967	4		Germany: Bavaria, 0.8 km SW Maising	4.2011	635	47.9817	11.2862	F.G. Dunkel	Dunkel, M
fal	Du-31002	Ranunculus fallacior ined.	1.38192	4		Germany: Saxony, Görlitz, Landeskrone	4.2014	291	51.1329	11.3258	F.G. Dunkel	Dunkel, M
fal	Du-28659	Ranunculus fallax s.l.	1.21568	4		Russia: Leningrad Oblast, Petergof 29 km W Saint Petersburg	8.2011	25	59.8833	29.8833	F.G. Dunkel	Dunkel, M
fal	Du-21321	Ranunculus fragifer W.Koch ex Dunkel	1.39034	4		Switzerland: Geneve, Park La Grange	4.2010	400	46.2075	6.20055	F.G. Dunkel	Dunkel, M
fal	Du-09009-1	Ranunculus grossidens W.Koch ex Brodtb.	1.32731	4		Switzerland: Canton Bern, 0.3 km SE Péry	5.2009	630	47.1912	7.25253	F.G. Dunkel	Dunkel, M
fal	Du-09009-2	Ranunculus grossidens W.Koch ex Brodtb.	1.31903	4		Switzerland, Canton Bern, 0.3 km SE Péry	5.2009	630	47.1912	7.25253	F.G. Dunkel	Dunkel, M
fal	Du-27627	Ranunculus kitaibelii Soó	1.24605	4		Ukraine: Transcarpatia, Fehet-hegy 16 km W Husz (locus typi)	4.2011	200	48.15	23.1	F.G. Dunkel	Dunkel, M
fal	Du-28571	Ranunculus nemorosifolius Hörandl & Gutermann	1.38165	4		Slovenia: Central Slovenia Ljubljana, Fužine	4.2012	280	46.051	14.5631	F.G. Dunkel	Dunkel, M
fal	Du-28580	Ranunculus nemorosifolius Hörandl & Gutermann	1.0255	3	2n = ca. 25	Slovenia: Southeast Slovenia 0.9 km WNW Krmačina	4.2012	176	45.668	15.3757	F.G. Dunkel	Dunkel, M
fal	Du-27681	Ranunculus olgae Soó	1.39829	4		Slovakia: Košice region, Var-hegy Var-hegy 5.8 km NNW Košice	5.2011	400	48.7636	21.2267	F.G. Dunkel	Dunkel, M
fal	Du-28585	Ranunculus poldinioides ined.	1.31011	4		Slovenia: Central Slovenia, 1.2 km SE Podpeč	4.2012	290	45.9672	14.4328	F.G. Dunkel	Dunkel, M
fal	Du-21131	Ranunculus pseudomendosus ined.	1.2292	4		Romania: Cluj County, 2.6 km NE Bonţida	4.2009	360	46.9264	23.8438	F.G. Dunkel	Dunkel, M
fal	Du-27367	Ranunculus pseudopleiophyllus ined.	1.17196	4	2n = ca. 32	Czech Rep.: Liberecký kraj, 6.0 km SE Doksy	5.2011	470	50.5374	14.7222	F.G. Dunkel	Dunkel, M
fal	Du-21159	Ranunculus reichenbachii Soó	1.25174	4		Romania: Cluj County, 2,3 km NW Viştea	4.2010	560	46.8166	23.3833	F.G. Dunkel	Dunkel, M
fal	Du-25767	Ranunculus reichenbachii Soó	1.30151	4		Hungary: Pest county, 4.4 km W Piliszentiván (locus typi)	4.2011	250	47.6125	18.8347	F.G. Dunkel	Dunkel, M
fal	Du-28502	Ranunculus reichertii Dunkel	1.38489	4		Germany: Rhineland-Palatinate, 0.3 km W Hundheim-Offenbach	4.2012	210	49.6247	7.54694	F.G. Dunkel	Dunkel, M
fal	Du-21054	Ranunculus subcarpaticus Soó	1.20758	4		Slovakia: Košice region, Var-hegy 5.8 km NNW Košice	5.2011	400	48.7636	21.2267	F.G. Dunkel	Dunkel, M
fal	Du-31409	Ranunculus subcompletus ined.	1.3094	4		Germany: Brandenburg, Spremberg, Georgenberg	5.2014	125	51.5717	14.3875	F.G. Dunkel	Dunkel, M
fal	Du-28766	Ranunculus suborbicularis Dunkel	1.36464	4		Germany: Thuringia, 4.4 km W Umpferstedt	5.2012	270	50.9799	11.3509	F.G. Dunkel	Dunkel, M
fal	Du-31079	Ranunculus suborbicularis Dunkel	1.89534	6		Germany: Saxony, Leipzig, Klingerhain	4.2014	112	51.3329	12.3494	F.G. Dunkel	Dunkel, M
fal	Du-31149	Ranunculus suborbicularis Dunkel	1.32198	4		Germany: Saxony-Anhalt, Dessau, Georgium	5.2014	71	51.8464	12.2321	F.G. Dunkel	Dunkel, M
fal	Du-28774	Ranunculus trautmannoides ined.	1.30996	4		Poland: Lower Silesian Voivodeship, 6.4 km W Mirków	5.2012	115	51.1623	17.0797	F.G. Dunkel	Dunkel, M
fal	Du-27585	Ranunculus vindobonensis Hörandl & Gutermann	1.25897	4	2n = 32	Austria: Lower Austria, 0.3 km N Schwarzensee (locus typi)	4.2011	530	48.0128	16.0621	F.G. Dunkel	Dunkel, M
fal	Du-28763	Ranunculus vratislaviensis ined.	1.29624	4		Poland: Lower Silesian Voivodeship, Breslau, Wrocław, Park Szczytnicki	4.2012	120	51.1142	17.0864	F.G. Dunkel	Dunkel, M
fal	Du-28858	Ranunculus wraberi Pignatti	1.30655	4		Slovenia: Inner Carniola-Karst, Nanos (locus typi)	5.2012	1203	45.7707	14.0503	F.G. Dunkel	Dunkel, M
