# Supplementary material for: Climatic differentiation in polyploid apomictic Ranunculus auricomus complex in Europe
Source: BMC Ecol. 2018 May 21;18:16. doi: 10.1186/s12898-018-0172-1 (PMC5963127; doi:10.1186/s12898-018-0172-1)
Supplement: Supplementary file 3 — Additional file 3. List of previously published chromosome counts from the Ranunculus auricomus complex in Europe. Spreadsheet “Data” lists extracted taxa, localities and chromosome numbers. Group: aur—“auricomus” group, cass—“cassubicus” group, fal—“fallax” group, ?—could not have been determined. Remaining captions are self-explanatory. Spreadsheet “References” lists reviewed literature. [file 12898_2018_172_MOESM3_ESM.xlsx]

## Sheet: Data
Group	Taxon	Chromosome number (2n)	Ploidy	Country	Locality	Sample number	Latitude	Longitude	Citation	Remark
aur	Ranunculus acrifoliiformis (Julin) Ericsson	32	4	Sweden	Uppland, Uppsala (Bondkyrka): "Stabby backe", Graben und Wiese	J.A.N. 5408 (cult. 1951: 7), 5635	59.8416	17.5761	Ericsson 2001:382 as "S Upl"; this refers probably to Julin & Nennfeldt 1967:168	locality from Julin & Nennfeldt 1967:168
aur	Ranunculus acrifolius (Nannf. & Harry Sm.) Ericsson	32	4	Finland	Varsinais-Suomi, Turku, Kupittaa		60.4349	22.2905	Rousi 1956:8 as R. auricomus ssp. acrifolius
aur	Ranunculus acutidens (Markl.) Ericsson	32	4	Finland	U, Tuusula, Purola		60.5101	25.0292	Rousi 1956:8 as R. auricomus ssp. acutidens
aur	Ranunculus acutiusculus (Markl.) Ericsson	32	4	Finland	U, Helsinki, Haaga		60.223	24.8951	Rousi 1956:8 as R. auricomus ssp. acutiusculus
aur	Ranunculus aemulans O.Schwarz	32	4	Germany	Thüringen, Weimar, historischer Friedhof (Nordteil des Hauptfriedhofs) Westteil unter großen Bäumen, Parkrasen	Du-5754	50.972	11.3255	Gregor & Hand 2007:34
aur	Ranunculus aemulans O.Schwarz	32	4	Germany	Goslar (Niedersachsen, Landkreis Goslar) / 4028; 3598000/5752800 / Böschung im Park bei der Kaiserpfalz, halbschattiger Standort. 280 m	Fundort 35	51.9006	10.4228	Lohwasser 2001:39, 67, 132
aur	Ranunculus aemulans O.Schwarz	32	4	Germany	Grünhof (Mecklenburg-Vorpommern, Landkreis Uecker-Randow) / An der Straße von Rothen-Klempenow nach Grünhof ca. 1 5 km vor Grünhof rechts im Wald, schattiger Standort. 10 m	Fundort 115	53.5445	14.2268	Lohwasser 2001:41, 67, 183
aur	Ranunculus aemulans O.Schwarz	32	4	Germany	Weimar, Alter Friedhof, W-Teil (locus classicus)		50.9742	11.3255	Izmaiłow 1976:17
aur	Ranunculus aemulans O.Schwarz	32	4	Germany	Gleisberg near Jena		50.9439	11.6521	Izmaiłow 1976:17
aur	Ranunculus aemulans O.Schwarz, 1 Expl. unbestimmbar	32	4	Germany	Harste (Niedersachsen, Landkreis Göttingen) / 4325; 3558600/5719750 / Kurz nach dem Ortsausgang von Harste in Richtung Adelebsen rechts auf asphaltiertem Weg (Anlieger frei) bis Buchenwaldrand fahren, dort im Buchenwald, halbschattiger und schattiger Standort. 215 m	Fundort 17	51.6091	9.84488	Lohwasser 2001:38, 67, 121
aur	Ranunculus aemulans O.Schwarz, Ranunculus argoviensis W.Koch, Ranunculus rotundatus Borch.-Kolb, l Expl. unbestimmbar	32	4	Germany	Neuhof bei Bad Sachsa (Niedersachsen, Landkreis Osterode am Harz) / 4429; 3609200/5715250 / Wiesen am Kranichteich in Neuhof, offener Standort. 285 m	Fundort 24	51.5611	10.5737	Lohwasser 2001:38, 67, 125
aur	Ranunculus aemulans O.Schwarz, Ranunculus biformis W.Koch, Ranunculus roessleri Borch.-Kolb, Ranunculus rotundatus Borch.-Kolb, 1 Expl. unbestimmbar	32	4	Germany	Klein-Biewende (Niedersachsen, Landkreis Wolfenbüttel) / 3929; 3613400/5774400 / Auwaldrest (Erlen, Eschen, Pappeln) bei Klein-Biewende, dort am Ortsrand, halbschattiger Standort / 100 m	Fundort 42	52.0917	10.6536	Lohwasser 2001:39, 67, 136
aur	Ranunculus aemulans O.Schwarz, Ranunculus haasii Soó	32	4	Germany	Goldenbaum (Mecklenburg-Vorpommern, Landkreis Mecklenburg-Strelitz) / Unmittelbar vor Goldenbaum, aus Richtung Carpin kommend, rechts im Graben in feuchter Wiese, offener Standort. 70 m	Fundort 91	53.3282	13.2399	Lohwasser 2001:40, 67, 168
aur	Ranunculus aemulans O.Schwarz, Ranunculus haasii Soó, Ranunculus puberulus W.Koch, Ranunculus rotundatus Borch.-Kolb, Ranunculus stricticaulis W.Koch	32	4	Germany	Südlich Vienenburg (Niedersachsen, Landkreis Goslar) / 4029; 3603850/5757650 / Ca. 5 km südlich von Vienenburg gegenüber vom NSG Oker, feuchter Wald (Hainbuche/Eiche), rechts und links vom Bach, schattiger Standort. 170 m	Fundort 36	51.9431	10.5092	Lohwasser 2001:39, 67, 133
aur	Ranunculus aemulans O.Schwarz, Ranunculus puberulus W.Koch	32	4	Germany	Windhausen (Niedersachsen, Landkreis Osterode am Harz) / 4227; 3584200/5738100 / Am Ortsausgang von Windhausen in Richtung Bad Grund auf der linken Seite ehemaliger Garten, aufgelassene Obstwiese, offener Standort. 230 m	Fundort 30	51.7707	10.2188	Lohwasser 2001:38, 67, 129
aur	Ranunculus aemulans O.Schwarz, Ranunculus rotundatus Borch.-Kolb	32	4	Germany	Scharzfeld (Niedersachsen, Landkreis Osterode am Harz) / 4328; 3597450/5723400 / Am Waldrand eines Buchenwaldes und auf einer Waldwiese direkt bei der Einhornhöhle bei Scharzfeld, halbschattiger und schattiger Standort. 380 m	Fundort 23	51.6365	10.4066	Lohwasser 2001:38, 67, 124
aur	Ranunculus aemulans O.Schwarz, Ranunculus rotundatus Borch.-Kolb	32	4	Germany	Winnigstedt (Niedersachsen, Landkreis Wolfenbüttel) / 3930; 4416450/5770900 / Straßenrand auf der rechten Seite am Ortseingang von Winnigstedt aus Richtung Watenstedt kommend, offener Standort. 110 m	Fundort 40	52.0656	10.7801	Lohwasser 2001:39, 67, 135
aur	Ranunculus aemulans O.Schwarz, Ranunculus rotundatus Borch.-Kolb, 1 Expl. unbestimmbar	32	4	Germany	Frellstedt (Niedersachsen, Landkreis Helmstedt) / 3731; 4425900/5786200 / Parkanlage bei der Kirche von Frellstedt, halbschattiger Standort, der gemäht wird. 120 m	Fundort 45	52.2044	10.9146	Lohwasser 2001:39, 67, 138
aur	Ranunculus aemulans O.Schwarz, Ranunculus rotundatus Borch.-Kolb, 4 Expl. unbestimmbar	32	4	Germany	Düna (Niedersachsen, Landkreis Osterode am Harz) / 4327; 3589500/5727550 / Straßenrand auf der linken Seite kurz nach der Abzweigung nach Düna unter Pappeln, offener Standort. 220 m	Fundort 28	51.6751	10.2928	Lohwasser 2001:38, 67, 128
aur	Ranunculus aemulans O.Schwarz, Ranunculus rotundatus Borch.-Kolb, Ranunculus suevicus Borch.-Kolb, 1 Expl. unbestimmbar	32	4	Germany	Tornowhof (Mecklenburg-Vorpommern, Landkreis Mecklenburg-Strelitz) / Kurz nach dem Ortsausgang von Tornowhof in Richtung Fürstenwerder rechts und links im Mischwald, schattiger Standort. 40 m	Fundort 100	53.3577	13.498	Lohwasser 2001:41, 67, 174
aur	Ranunculus alnetorum W.Koch	32	4	Spain	Léon, Puerto de Leitariegos	SEV 128348	42.9932	-6.41246	Diosdado & Pastor 1996:169; location supplemented from herbarium voucher
aur	Ranunculus alnetorum W.Koch	32	4	Switzerland	Lange Erlen bei Basel		47.5749	7.6155	Häflinger 1943:323, 325
aur	Ranunculus argoviensis W.Koch	32	4	Switzerland	Bözberg, Aargau		47.5012	8.15112	Häflinger 1943:323, 325; Rutishauser 1954:8
aur	Ranunculus argoviensis W.Koch	32	4	Switzerland	Amrisvil	Arg 1-3	47.5469	9.31415	Rutishauser 1954:8
aur	Ranunculus argoviensis W.Koch	32	4	Germany	[Baden-Württemberg] Kl. Laufenburg	Arg 4-7	47.565	8.06237	Rutishauser 1954:8
aur	Ranunculus argoviensis W.Koch, Ranunculus haasii Soó, Ranunculus roessleri Borch.-Kolb, Ranunculus suevicus Borch.-Kolb, 1 Expl. unbestimmbar	32	4	Germany	Deetz (Sachsen-Anhalt, Landkreis Stendal) / Am Ortsausgang von Deetz in Richtung Vinzelberg auf der rechten Seite im Bruchwald (Erlen, Hainbuchen, Pappeln), schattiger Standort. 45 m	Fundort 59	52.5524	11.6731	Lohwasser 2001:39, 67, 148
aur	Ranunculus argoviensis W.Koch, Ranunculus haasii Soó, Ranunculus rotundatus Borch.-Kolb, 2 Expl. unbestimmbar	32	4	Germany	Wusterhausen (Brandenburg, Landkreis Ostprignitz-Ruppin) / Ca. 500 m vor Wusterhausen, aus Richtung Plänitz-Leddin kommend, im Wald (Ulme, Hainbuche, Birke, Eiche) und im Straßengraben, schattiger Standort. 36 m	Fundort 69	52.8965	12.4346	Lohwasser 2001:40, 67, 154
aur	Ranunculus argoviensis W.Koch, Ranunculus kochii, 1 Expl. unbestimmbar	32	4	Germany	Secantsgraben (Sachsen-Anhalt, Landkreis Stendal) / An der Straße zwischen Lindstedt und Bismark an der Kreisgrenze kurz vor dem Secantsgraben auf der rechten Seite auf der Wiese, offener Standort. 35 m	Fundort 57 I	52.6167	11.5359	Lohwasser 2001:39, 67, 146
aur	Ranunculus argoviensis W.Koch, Ranunculus leptomeris Haas, Ranunculus rotundatus Borch.-Kolb, Ranunculus suevicus Borch.-Kolb	32	4	Germany	Bantikow (Brandenburg, Landkreis Ostprignitz-Ruppin) / Von Wusterhausen in Richtung Bantikow; kurz hinter dem Ortsausgang von Wusterhausen an der Straße rechts und links Holzgeländer, dort links zum See gehen, im Wald am See, feuchter Wald, schattiger Standort. 40 m	Fundort 71	52.9115	12.4598	Lohwasser 2001:40, 67, 156
aur	Ranunculus argoviensis W.Koch, Ranunculus leptomeris Haas, Ranunculus suevicus Borch.-Kolb	32	4	Germany	Calvörde (Sachsen-Anhalt, Ohrekreis) / 3633; 4453100/5807100 / Vor Calvörde, aus Richtung Zobbenitz kommend, am Straßenrand unter Ahorn auf der rechten Seite am Wassergraben und links im Wald, offener und schattiger Standort. 55 m	Fundort 52	52.4009	11.1874	Lohwasser 2001:39, 67, 143
aur	Ranunculus argoviensis W.Koch, Ranunculus leptomeris Haas, Ranunculus suevicus Borch.-Kolb	32	4	Germany	Lohm (Brandenburg, Landkreis Ostprignitz-Ruppin) / Kurz nach dem Ortsausgang von Lohm in Richtung Zernitz rechts und links im Graben unter Eschen, halbschattiger Standort. 28 m	Fundort 68	52.8633	12.3209	Lohwasser 2001:40, 67, 154
aur	Ranunculus argoviensis W.Koch, Ranunculus leptomeris Haas, Ranunculus suevicus Borch.-Kolb, l Expl. unbestimmbar	32	4	Germany	Uchtspringe (Sachsen-Anhalt, Landkreis Stendal) / Unmittelbar nach dem Ortsschild von Uchtspringe, aus Richtung Stendal kommend, rechts in einen Waldweg hinein, dann auf der linken Seite (feuchter Wald, vor allem Ahorn, Pappeln), schattiger Standort. 50 m	Fundort 56	52.5692	11.6405	Lohwasser 2001:39, 67, 145
aur	Ranunculus argoviensis W.Koch, Ranunculus multisectus Haas, Ranunculus rotundatus Borch.-Kolb	32	4	Germany	Fleethof(Mecklenburg-Vorpommern, Landkreis Uecker-Randow) / An der Straße zwischen Schwichtenberg und Fleethof auf der rechten Seite am Rande des NSG, Wald aus Silberpappeln und Weiden, schattiger Standort. 10 m	Fundort 121	53.6657	13.7007	Lohwasser 2001:41, 67, 187
aur	Ranunculus argoviensis W.Koch, Ranunculus multisectus Haas, Ranunculus suevicus Borch.-Kolb, 1 Expl. unbestimmbar	32	4	Germany	Neustrelitz (Mecklenburg-Vorpormern, Landkreis Mecklenburg-Strelitz) / Im Stadtpark von Neustrelitz unter Bäumen, offener und halbschattiger Standort. 80 m	Fundort 92	53.361	13.0552	Lohwasser 2001:40, 67, 169
aur	Ranunculus argoviensis W.Koch, Ranunculus nicklesi (Engel) Borch.-Kolb, 1 Expl. unbestimmbar	32	4	Germany	Bergholz (Mecklenburg-Vorpommern, Landkreis Uecker-Randow) / An der Straße Löcknitz in Richtung Brüssow bei der Abzweigung nach Bergholz am Rande des NSG und an der Bushaltestelle, schattiger und halbschattiger Standort. 20 m	Fundort 111	53.4413	14.1896	Lohwasser 2001:41, 67, 180
aur	Ranunculus argoviensis W.Koch, Ranunculus pseudovertumnalis Haas	32	4	Germany	Waake (Niedersachsen, Landkreis Göttingen) / 4426; 3573400/5711550 / An der Straße von Waake in Richtung Mackenrode auf der rechten Seite gleich hinter dem Ortsausgang, Mähwiese und gesamter Straßenrandbereich, offener Standort. 280 m	Fundort 19	51.5337	10.0568	Lohwasser 2001:38, 67, 122
aur	Ranunculus argoviensis W.Koch, Ranunculus puberulus W.Koch, Ranunculus rotundatus Borch.-Kolb, 2 Expl. unbestimmbar	32	4	Germany	Kalkwerk Winterberg (Niedersachsen, Landkreis Osterode am Harz) / 4127; 3583600/5744500 / Feuchter Wald (Ahorn, Buchen, Hainbuchen, Pappeln) am zweiten Parkplatz hinter dem Kalkwerk Winterberg von Bad Grund in Richtung Seesen, schattiger Standort. 300 m	Fundort 31	51.8283	10.2116	Lohwasser 2001:38, 67, 130
aur	Ranunculus argoviensis W.Koch, Ranunculus rotundatus Borch.-Kolb	32	4	Germany	Mackenrode (Niedersachsen, Landkreis Göttingen) / 4426; 3573850/5710650 / Straße von Waake in Richtung Mackenrode; auf der ersten Anhöhe links kleines Wäldchen, schattiger Standort. 260 m	Fundort 20	51.5255	10.0631	Lohwasser 2001:38, 67, 122
aur	Ranunculus argoviensis W.Koch, Ranunculus rotundatus Borch.-Kolb	32	4	Germany	Strasburg Kiosk (Mecklenburg-Vorpommern, Landkreis Uecker-Randow) / An der Straße nach Linche[n]shöh von Strasburg aus rechts am Parkplatz mit Kiosk im Park am See unter Bäumen (Buchen, Hainbuchen), schattiger Standort.	Fundort 117	53.504	13.7536	Lohwasser 2001:41, 67, 184
aur	Ranunculus argoviensis W.Koch, Ranunculus rotundatus Borch.-Kolb, 1 Expl. unbestimmbar	32	4	Germany	Adelebsen (Niedersachsen, Landkreis Göttingen) / 4424; 3553100/5717850 / Erlenbruchwald (Auwald) 1-2 km vor Adelebsen auf der rechten Seite von Harste aus kommend, schattiger und halbschattiger Standort. 185 m	Fundort 14	51.5926	9.7652	Lohwasser 2001:38, 67, 119
aur	Ranunculus argoviensis W.Koch, Ranunculus rotundatus Borch.-Kolb, 1 Expl. unbestimmbar	32	4	Germany	Bernshausen (Niedersachsen, Landkreis Göttingen) / 4427; 3582000/5713450 / Straße von Semshausen in Richtung Germershausen; am Ortsausgang von Semshausen auf der linken Seite Auwaldreste mit Pappeln, feuchter Standort, schattiger Standort. 155 m	Fundort 21	51.5496	10.1811	Lohwasser 2001:38, 67, 123
aur	Ranunculus argoviensis W.Koch, Ranunculus rotundatus Borch.-Kolb, Ranunculus suevicus Borch.-Kolb, 1 Expl. unbestimmbar	32	4	Germany	Zichtau (Sachsen-Anhalt, Altmarkkreis Salzwedel) / Von Wiepke in Richtung Zichtau unmittelbar vor dem Ortseingang von Zichtau links im Wald (Ahorn, Buche, Kastanie, viel Ahorn-Jungwuchs), schattiger Standort. 60 m	Fundort 55	52.6072	11.3052	Lohwasser 2001:39, 67, 145
aur	Ranunculus argoviensis W.Koch, Ranunculus suevicus Borch.-Kolb, l Expl. unbestimmbar	32	4	Germany	Gardelegen (Sachsen-Anhalt, Altmarkkreis Salzwedel) / Innerhalb von Gardelegen an der Straße nach Salzwedel links am Rand eines Feldweges unter Kastanien und Eichen, halbschattiger Standort. 50 m	Fundort 54	52.527	11.3784	Lohwasser 2001:39, 67, 144
aur	Ranunculus auricomus s.l	32	4	Bulgaria	Beglika, SSW of Batak, roadside, 1500 m	13151	41.9355	24.2019	Baltisberger 2006
aur	Ranunculus auricomus s.l	32	4	Denmark	Jonstrup Vang		55.7624	12.3617	Böcher 1938:15
aur	Ranunculus auricomus s.l	48	6	Sweden	Norrbotten, Torne Lappmark: Pålnoviken		68.4667	18.6833	Bruun 1932:157, without locality; Fagerström & Kvist 1980:299, identification of locality; Ericsson 1992:135, undescribed microspecies
aur	Ranunculus auricomus s.l.	24	3	France	Département des Vosges, Villers; 750 m		48.3012	6.17363	Vuillemin 1989:20; Vuillemin 1990:210
aur	Ranunculus auricomus s.l.	32	4	France	Département des Vosges, Villers; 750 m		48.3012	6.17363	Vuillemin 1989:20; Vuillemin 1990:210
aur	Ranunculus auricomus s.l.	32	4	France	Département du Haut-Rhin, Kiffis; 500 m		47.4404	7.35848	Vuillemin 1990:210
aur	Ranunculus auricomus s.l.	32	4	France	Département du Haut-Rhin, Wolschwiller; 550 m		47.4618	7.40873	Vuillemin 1990:210
aur	Ranunculus auricomus s.l.	32	4	Germany	Berlin-Zehlendorf: Wannsee, Glienicker Volkspark, östl. Hofgärtner, unter Bäumen	R7	52.4162	13.0959	Melzheimer et al. 1976:348
aur	Ranunculus auricomus s.l.	32	4	Germany	Berlin-Zehlendorf: Wannsee, Glienicker Volkspark, östl. Hofgärtner, unter Bäumen	R8	52.4162	13.0959	Melzheimer et al. 1976:348
aur	Ranunculus auricomus s.l.	32	4	Germany	Berlin-Zehlendorf: Wannsee, Glienicker Volkspark, östl. Hofgärtner, unter Bäumen	R9	52.4162	13.0959	Melzheimer et al. 1976:348
aur	Ranunculus auricomus s.l.	32	4	Germany	Berlin-Zehlendorf: Wannsee, NE-Ufer der Pfaueninsel unter Gebüsch und Bäumen im Efeu	R5	52.4382	13.1343	Melzheimer et al. 1976:348
aur	Ranunculus auricomus s.l.	32	4	Germany	Berlin-Spandau: Jagen 69, Nähe Eiskeller, feuchte Waldung	R3	52.586	13.1438	Melzheimer et al. 1976:348
aur	Ranunculus auricomus s.l.	32 + 1B	4	Germany	Berlin-Tegel: Reiherwerder, unter Bäumen in Ufernähe	R17	52.5874	13.2606	Melzheimer et al. 1976:348
aur	Ranunculus auricomus s.l.	32	4	Germany	Berlin-Charlottenburg: Schlosspark, am Wassergraben unter Gebüsch und Bäumen	R10	52.5249	13.2915	Melzheimer et al. 1976:348
aur	Ranunculus auricomus s.l.	32	4	Germany	Berlin-Reinickendorf: Lübars, nähe Kleiner Torfstich, am Wassergraben unter Gebüsch	R15	52.6196	13.3206	Melzheimer et al. 1976:348
aur	Ranunculus auricomus s.l.	32	4	Germany	Berlin-Reinickendorf: Lübars, Wiese am Großen Torfstich	R14	52.6212	13.3249	Melzheimer et al. 1976:348
aur	Ranunculus auricomus s.l.	32	4	Germany	Berlin-Reinickendorf: Lübars, NW Alt-Lübars, Mähwiese südl. vom Tegeler Fließ	R11	52.6223	13.3512	Melzheimer et al. 1976:348
aur	Ranunculus auricomus s.l.	32	4	Germany	Berlin-Reinickendorf, Lübars, nördl. vom Teich, Mähwiese	R4	52.6228	13.3633	Melzheimer et al. 1976:348
aur	Ranunculus auricomus s.l.	32	4	Slovakia	Central Slovakia, Liptovská kotlina, Ivachnová (meadow)	C43	49.0899	19.411	Hörandl et al. 2009:1198
aur	Ranunculus auricomus s.l.	24	3	Switzerland	Canton Neuchâtel, Creux-au-Loup; 800 m		46.9409	6.67112	Vuillemin 1989:20; Vuillemin 1990:210
aur	Ranunculus auricomus s.l.	24	3	Switzerland	Canton Neuchâtel, Les Brenêts; 750 m		47.0699	6.70363	Vuillemin 1989:20; Vuillemin 1990:210
aur	Ranunculus auricomus s.l.	32	4	Switzerland	Canton Neuchâtel, Creux-au-Loup; 800 m		46.9409	6.67112	Vuillemin 1989:20; Vuillemin 1990:210
aur	Ranunculus auricomus s.l.	32	4	Switzerland	Canton Neuchâtel, Tourbière du Cachot; 1100 m		46.9889	6.67566	Vuillemin 1989:20; Vuillemin 1990:210
aur	Ranunculus auricomus s.l.	32	4	Switzerland	Canton Neuchâtel, Les Brenêts; 750 m		47.0699	6.70363	Vuillemin 1989:20; Vuillemin 1990:210
aur	Ranunculus auricomus s.l.	32	4	Switzerland	Canton Neuchâtel, Landeyeux; 600 m		47.0329	6.90694	Vuillemin 1989:20; Vuillemin 1990:210
aur	Ranunculus auricomus s.l.	32	4	Switzerland	Canton Neuchâtel, Fenin; 600 m		47.0305	6.93008	Vuillemin 1989:20; Vuillemin 1990:210
aur	Ranunculus auricomus s.l.	32	4	Switzerland	Canton Neuchâtel, Lignières; 750 m		47.0819	7.0661	Vuillemin 1989:20; Vuillemin 1990:210
aur	Ranunculus auricomus s.l.	24	3	Switzerland	Canton Jura, Mauensee; 504 m		47.1673	8.0786	Vuillemin 1990:209; Vuillemin 1992:86
aur	Ranunculus auricomus s.l.	32	4	Switzerland	Canton Jura, Mauensee; 504 m		47.1673	8.0786	Vuillemin 1990:209; Vuillemin 1992:86
aur	Ranunculus auricomus s.l.	32	4	Switzerland	Canton Genève, Chancy; 440 m		46.1493	5.97164	Vuillemin 1990:210
aur	Ranunculus auricomus s.l.	32	4	Switzerland	Canton Genève, St. Julien; 600 m		46.1458	6.08535	Vuillemin 1990:210	St.-Julien-en-Genevois is situated in France; no St. Julien in Switzerland
aur	Ranunculus auricomus s.l.	32	4	Switzerland	Canton Vaud, Fey; 600 m		46.6761	6.68168	Vuillemin 1990:210
aur	Ranunculus auricomus s.l.	32	4	Switzerland	Canton Vaud, Possens; 620 m		46.6602	6.70785	Vuillemin 1990:210
aur	Ranunculus auricomus s.l.	32	4	Switzerland	Canton Vaud, Ogens; 624 m		46.711	6.72305	Vuillemin 1990:210
aur	Ranunculus auricomus s.l.	32	4	Switzerland	Canton Neuchâtel, Boudevilliers; 750		47.027	6.88948	Vuillemin 1990:210
aur	Ranunculus auricomus s.l.	32	4	Switzerland	Canton Jura, Chevenez; 480 m		47.3919	7.00079	Vuillemin 1990:210
aur	Ranunculus auricomus s.l.	32	4	Switzerland	Canton Berne, Gals-St. Jean; 435 m		47.0451	7.06983	Vuillemin 1990:210
aur	Ranunculus auricomus s.l.	32	4	Switzerland	Canton Berne, Erlach; 440 m		47.043	7.09787	Vuillemin 1990:210
aur	Ranunculus auricomus s.l.	32	4	Switzerland	Canton Berne, La Neuveville; 530-710 m		47.0666	7.09843	Vuillemin 1990:210
aur	Ranunculus auricomus s.l.	32	4	Switzerland	Canton Berne, Diesse; 820 m		47.1131	7.11599	Vuillemin 1990:210
aur	Ranunculus auricomus s.l.	32	4	Switzerland	Canton Berne, Lamboing; 580–890 m		47.1165	7.13544	Vuillemin 1990:210
aur	Ranunculus auricomus s.l.	32	4	Switzerland	Canton Jura, Glovelier; 650 m		47.3338	7.1987	Vuillemin 1990:210
aur	Ranunculus auricomus s.l.	32	4	Switzerland	Canton Jura, Lucelle; 600 m		47.42	7.24541	Vuillemin 1990:210
aur	Ranunculus auricomus s.l.	32	4	Switzerland	Canton Berne, Péry; 600 m		47.1928	7.24944	Vuillemin 1990:210
aur	Ranunculus auricomus s.l.	32	4	Switzerland	Canton Berne, Frinvillier; 530 m		47.1688	7.25645	Vuillemin 1990:210
aur	Ranunculus auricomus s.l.	32	4	Switzerland	Canton Jura, Grandval; 600 m		47.2835	7.42523	Vuillemin 1990:210
aur	Ranunculus auricomus s.l.	32	4	Switzerland	Canton Jura, Chourchapoix; 540 m		47.3454	7.45482	Vuillemin 1990:210
aur	Ranunculus auricomus s.l.	32	4	Switzerland	Canton Soleure, Mariastein; 480 m		47.4646	7.46759	Vuillemin 1990:210
aur	Ranunculus auricomus s.l.	32	4	Switzerland	Canton Soleure, Soleure; 460 m		47.2098	7.53767	Vuillemin 1990:210
aur	Ranunculus auricomus s.l.	32	4	Switzerland	Canton Bâle-campagne, Ettingen; 440 m		47.4805	7.54321	Vuillemin 1990:210
aur	Ranunculus auricomus s.l.	32	4	Switzerland	Canton Bâle-campagne, Pfeffingen; 315 m		47.4586	7.5899	Vuillemin 1990:210
aur	Ranunculus auricomus s.l.	32	4	Switzerland	Canton Soleure, Dornach; 375-583 m		47.4801	7.61624	Vuillemin 1990:210
aur	Ranunculus auricomus s.l.	32	4	Switzerland	Canton Soleure, Burg; 480 m		47.2193	7.61639	Vuillemin 1990:210
aur	Ranunculus auricomus s.l.	32	4	Switzerland	Canton Berne, Willadingen; 460 m		47.1451	7.61657	Vuillemin 1990:210
aur	Ranunculus auricomus s.l.	32	4	Switzerland	Canton Bâle-campagne, Birsfelden; 274 m		47.554	7.626	Vuillemin 1990:210
aur	Ranunculus auricomus s.l.	32	4	Netherlands	Oud Amelisweerd, near Bunnik (prov. of Utrecht)	R.35,R.36	52.0749	5.17718	Gadella & Kiphuis 1968:177
aur	Ranunculus auricomus s.l.	32	4	Netherlands	Along the Kromme Rijn, near Bunnik (prov. of Utrecht)	R.92	52.0661	5.21181	Gadella & Kiphuis 1968:178
aur	Ranunculus auricomus s.l.	32	4	Netherlands	near Hasselt (prov. Overijssel)	11.856-11.857	52.5911	6.0915	Gadella & Kiphuis 1973:306
aur	Ranunculus auricomus s.l.		4	Czech Republic	Moravia, Lelekovice, vlhká zrašelinělá louka v nivě potoka Ponávka 0,8 km J kostela		49.2835	16.5808	Kočková 2009:13 & 30	Flow Cytometry; leg. Lenka Kočková & Petr Bureš 14. 5. 2008
aur	Ranunculus auricomus s.l.	32	4	Czech Republic	S. Bohemia, distr. Pelhřimov: village Zahrádka, meadows in the valley E. of the village, 450 m a.s.l.		49.4621	15.0817	Měsíček & Javůrková-Jarolímová 1992:11	coll. B. Slavík, V. Javůrková 20.5.1976, count J[arolímová]
aur	Ranunculus auricomus s.l.	32	4	England	Lancs., v.c. 60, near Yealand Conyers, SD/50.74.		54.1675	-2.76059	Hollingsworth et al. 1992:136
aur	Ranunculus auricomus s.l.	32	4	England	E. Suffolk, V.c. 25, Great Wenham, churchyard, TM/07.38.		52.0012	1.01674	Montgommery et al. 1997:367
aur	Ranunculus auricomus s.l.		4	England	Knapwell, Cambridgeshire		52.246	-0.04771	Smith & Bennet 1975:232	Feulgen photometry
aur	Ranunculus auricomus s.l.	40	5	Finland	PP, Kemi		65.745	24.6161	Rousi 1956:8 as R. auricomus ssp. calvescens; Fagerlind & Kvist 1980:299, not Ranunculus calvescens but other taxon of the group; Ericsson 1992:135
aur	Ranunculus auricomus s.l.	32	4	Hungary	Cott. Hajdú-Bihar, Hajdúbagos, in graminosis silvae		47.3938	21.6655	Pólya 1950:50	determination in Soó 1964: 235 als Ranunculus schilleri Soó and Ranunculus auricomiformis Soó
aur	Ranunculus auricomus s.l.	56	7	Italy	Località "Pantano de Scanno" (L'Aquila) in un pasculo chiuso umido a 1600 m		41.8606	13.9129	Marchi 1971:129
aur	Ranunculus basitruncatus Borch.-Kolb, Ranunculus baasii	32	4	Germany	Feldberg (Mecklenburg-Vorpommern, Landkreis Mecklenburg-Strelitz) / In Feldberg an der Prenzlauer Straße in Richtung Prenzlau links Sumpfwiese mit Schilf, offener Standort. 20 m	Fundort 99	53.3408	13.4533	Lohwasser 2001:41, 67, 173
aur	Ranunculus basitruncatus Borch.-Kolb, Ranunculus indecorus W.Koch, Ranunculus kochii	32	4	Germany	Secantsgraben (Sachsen-Anhalt, Landkreis Stendal) / An der Straße zwischen Lindstedt und Bismark an der Kreisgrenze kurz vor dem Secantsgraben auf der rechten Seite auf der Wiese, offener Standort. 35 m	Fundort 57 II	52.6162	11.5354	Lohwasser 2001:39, 67, 147
aur	Ranunculus basitruncatus Borch.-Kolb, Ranunculus indecorus W.Koch, Ranunculus rectus, Ranunculus varicus	32	4	Germany	Teschendorf I (Brandenburg, Landkreis Oberhavel) / Zwischen Nassenheide und Teschendorf an der B 96 (ca. 1,7 km vor Teschendorf) Weide auf der linken Seite, offener Standort. 40 m	Fundort 79	52.8417	13.1959	Lohwasser 2001:40, 67, 161
aur	Ranunculus basitruncatus Borch.-Kolb, Ranunculus integerrimus (Julin) Borch.-Kolb, Ranunculus puberulus W.Koch	32	4	Germany	Tangermünde (Sachsen-Anhalt, Landkreis Stendal) / [coordinates not applicable] /Wiese im Überflutungsgebiet der Elbe, offener Standort. 33 m	Fundort 63	52.537	11.9706	Lohwasser 2001:40, 67, 150
aur	Ranunculus biformis W.Koch	32	4	Switzerland	Sissacher Fluh, Basel-Land		47.4799	7.81668	Häflinger 1943:323, 325
aur	Ranunculus biformis W.Koch	32	4	Switzerland	Birstal bei Basel	Pbif 1	47.5377	7.62207	Rutishauser 1954:9 as "Ranunculus pseudobiformis W.Koch ined."
aur	Ranunculus biformis W.Koch, Ranunculus lucorum, Ranunculus puberulus W.Koch, Ranunculus rotundatus Borch.-Kolb, Ranunculus stricticaulis W.Koch	32	4	Germany	Sommersdorf (Mecklenburg-Vorpommern Landkreis Uecker-Randow) / An der Straße Wartin in Richtung Sommersdorf ca. 300 m vor dem Ortsschild rechts im Straßengraben, offener Standort. 50 m	Fundort 107	53.2775	14.1761	Lohwasser 2001:41, 67, 178
aur	Ranunculus binatus Kit.	32	4	Slovakia	Slovenský Raj, Hrabušice, Pštrosík [Štrosik - meadow SE from the settlement of Podlesok], 7088a		48.9649	20.3853	Uhriková & Králik in Löve 1980:729; Marhold et al. 2007:491
aur	Ranunculus bipinnatus sensu Jasiewicz	32	4	Poland	Krakova region		50.0552	19.9559	Skalinska, M. Potrowicz, Sokołowska-Kulczycka et al. 1961:465 as Ranunculus auricomus subsp. bipinnatus / according to Májovský & Murin et al. 1987 R. jasiewiczii Májovký
aur	Ranunculus boecheri (Fagerstr. & Kvist) Ericsson	16	2	Greenland	East-Greenland, Cape Daussy		68.6774	-26.8681	Böcher 1938:15 as Ranunculus auricomus var. glabrata; Ericsson 1995:25, only 55 % regular pollen, probably dihaploid
aur	Ranunculus boreoapeninus Pignatti	32	4	Italy	Ligurien, M. Antola		44.5733	9.15017	unpublished count T. Gregor 2007
aur	Ranunculus brunnescens (Markl.) Ericsson	32	4	Finland	U, Porvoo, Kaarenkylä		60.4676	25.5427	Rousi 1956:8 as R. auricomus ssp. brunnescens
aur	Ranunculus carlittensis (Sennen) Grau	32	4	Spain	Álava	SEV 128351	42.8481	-2.67027	Diosdado & Pastor 1996:169	location imprecise
aur	Ranunculus carpinetorum Hörandl & Gutermann	32	4	Austria	Burgenland, Leithagebirge, Donnerskirchen, Soferlsgraben, 2,5 km NNE Donnerskirchen: Hainbuchenwald, 240 m s. m., 8065/4	Hö5588	47.9211	16.6532	Hörand et al. 1997:198; Hörandl & Gutermann 1999:107; Dobeš & Vitek 2000:49
aur	Ranunculus chasii Dunkel	32	4	France	dép. Hautes-Alpes. Éourres		44.2124	5.69922	unpublished count T. Gregor 2007
aur	Ranunculus cosmophyllus Ericsson	32	4	Finland	V, Turku, Ruissalo		60.4335	22.1645	Rousi 1956:8 as R. auricomus ssp. angustisectus
aur	Ranunculus crassiusculus (Markl.) Ericsson	32	4	Finland	V, Turku, Ruissalo		60.4335	22.1645	Rousi 1956:8 as R. auricomus ssp. crassiusculus
aur	Ranunculus aff. dactylophyllus Borch.-Kolb	32	4	Austria	Oberösterreich, Kalkalpen, Windischgarsten, W-Fuß des Garstner Ecks: Flachmoorwiesen, 590 m s. m., 8251/4	Hö6651=Gu29568	47.7011	14.3337	Hörandl & Gutermann 1998:271; Dobeš & Vitek 2000:49	"tetraploid polulation"
aur	Ranunculus debreceniensis Hörandl & Gutermann	32	4	Slovakia	Devínska Kobyla, Bratislava[-Karlovy Ves], city quarter of Kútiky, 7868a		48.1612	17.0424	Májovský, Murín et al. 1987:35 as Ranunculus acriformis Soó; Marhold et al. 2007:491	original published: Váchová & Májovský in Májovský J. (1978) Index of chromosome numbers of Slovakian flora (Part 6). Acta Fac. Rer. Nat. Univ. Comen. Bot. 26:1-42. Leg.: Májovský as Ranunculus acriformis Soó
aur	Ranunculus dysandrus (Markl.) Ericsson	32	4	Finland	V, Turku, Ruissalo		60.4335	22.1645	Rousi 1956:8 as R. auricomus ssp. dysandrus
aur	Ranunculus elegantifrons Hörandl & Guterm.	32	4	Austria	Niederösterreich, Marchtal, Hohenau an der March, Lange Wiese bei Kote 151: feuchter Auwald, 150 m s. m., 7467/2	Hö6586A	48.6059	16.9045	Hörandl & Gutermann 1999:120; Dobeš & Vitek 2000:49
aur	Ranunculus elegantifrons Hörandl & Guterm.	32 [± 1]	4	Austria	Niederösterreich, Weinviertel, Waldgebiet zwischen Falkenstein und Poysdorf, Waldweg N Ameiswinkel: Eichenwald, Robinienforst, 320 m s. m., 7265/4	Hö6597	48.7012	16.5973	Hörandl & Gutermann 1999:123; Dobeš & Vitek 2000:49
aur	Ranunculus envalirensis Grau	16	2	France	Massif central		45.5274	2.79555	Nogler 1982:14 as Ranunculus auricomus	leg. E. Landolt; georeferencing imprecise
aur	Ranunculus envalirensis Grau	16	2	France	Massif central		45.5274	2.79555	Nogler 1982:14 as Ranunculus auricomus	leg. E. Landolt; georeferencing imprecise
aur	Ranunculus envalirensis Grau	16	2	Spain	Gerona	SEV 128349	41.9768	2.82109	Diosdado & Pastor 1996:169
aur	Ranunculus euryphyllarius (Markl.) Ericsson	32	4	Finland	U, Helsinki parish, Sottungsby		60.2833	25.1397	Rousi 1956:8 as R. auricomus ssp. euryphyllarius
aur	Ranunculus ferocior Dunkel	32	4	Germany	Bayern, Unterfranken, Pusselsheim		49.9828	10.3846	unpublished count T. Gregor 2007
aur	Ranunculus fragifer W.Koch ex Dunkel	32	4	Switzerland	[Canton de Genève] Troinex	Frag 1-3	46.1635	6.14653	Rutishauser 1954:8
aur	Ranunculus gayeri Soó	32	4	Austria	Niederösterreich, Hundsheimer Berg, NW Flanke (bei Hainburg an der Donau), 400-600 m s. m., 7867/4	Gu23542	48.1394	16.939	Hörand et al. 1997:198; Hörandl & Gutermann 1999:115 [locality slightly different]; Dobeš & Vitek 2000:49
aur	Ranunculus gayeri Soó	32	4	Slovakia	Devínska Kobyla, Brastislava-Karlova Ves, Králova lúka [Kráľova hora hill], 7868a		48.16	17.0319	Uhriková & Feráková in Löve 1978:379; Marhold et al. 2007:491	leg. Feráková
aur	Ranunculus genevensis W.Koch ined.	32	4	Switzerland	[Canton de Genève] Troinex	Gen 1,2	46.1635	6.14653	Rutishauser 1954:9
aur	Ranunculus glaucescens (Markl.) Ericsson	32	4	Finland	U, Helsinki, Haaga		60.223	24.8951	Rousi 1956:8 as R. auricomus ssp. glaucescens
aur	Ranunculus gortanii Pignatti	32	4	Italy	Marano Lagunare (Udine) in località Boscobando, bosco planiziale		45.7946	13.1834	Marchi & Visonà 1982:258
aur	Ranunculus gortanii Pignatti	32	4	Italy	Oslavia (Gorizio), carpineto degradato, sottobosco bordi di un torrentello		45.9753	13.6087	Marchi & Visonà 1982:258 as Ranunculus aesontinus Pignatti; Masci et al. 1994:102 as Ranunculus aesontinus
aur	Ranunculus graecensis Hörandl & Gutermann	32	4	Austria	Steiermark, Murtal, Graz, Botanischer Garten der Universität Graz, Holteigasse 6: spontan und subspontan im Arboretum, Wiesen und Hecken, 370 m s. m., 8958/2		47.0826	15.4566	Hörandl & Gutermann 1999:126; Dobeš & Vitek 2000:50
aur	Ranunculus haasii Soó	32	4	Germany	Grünz (Mecklenburg-Vorpommern, Landkreis Uecker-Randow) / Hinter Grünz in Richtung Prenzlau am Eingang zum Randower Bruch im feuchten Wald auf der rechten Seite, schattiger Standort. 45 m	Fundort 106	53.2883	14.1298	Lohwasser 2001:41, 67, 177
aur	Ranunculus haasii Soó, Ranunculus indecorus W.Koch, Ranunculus puberulus W.Koch	32	4	Germany	Eichstedt (Sachsen-Anhalt, Landkreis Stendal) / Am Ende der Straße von Eichstedt rechts und links eines Feldweges mit Weiden, offener Standort. 35 m	Fundort 60	52.6772	11.8463	Lohwasser 2001:39, 67, 148
aur	Ranunculus haasii Soó, Ranunculus indecorus W.Koch, Ranunculus puberulus W.Koch, 1 Expl. unbestimmbar	32	4	Germany	Boitzenburg (Brandenburg, Landkreis Uckermark) / Böschung im Ort gegenüber der Wisent-Apotheke, offener und halbschattiger Standort. 80 m	Fundort 95	53.2644	13.6083	Lohwasser 2001:41, 67, 171
aur	Ranunculus haasii Soó, Ranunculus indecorus W.Koch, Ranunculus rotundatus Borch.-Kolb, 2 Expl. unbestimmbar	32	4	Germany	Boitzenburg Mühle (Brandenburg, Landkreis Uckermark) / Feuchte Wiese bei dem Parkplatz Mühle und Mühlenmuseum, am Rande des NSG, offener Standort. 65 m	Fundort 94	53.2664	13.6161	Lohwasser 2001:41, 67, 170
aur	Ranunculus haasii Soó, Ranunculus puberulus W.Koch, 1 Expl. unbestimmbar	32	4	Germany	Watzumer Häuschen (Niedersachsen, Landkreis Helmstedt) / 3830; 4419800/5782100 / Am Waldrand bei der Waldgaststätte "Watzumer Häuschen" an der Straße zwischen Räbke und Eitzum, halbschattiger Standort. 180 m	Fundort 43	52.1667	10.8263	Lohwasser 2001:39, 67, 137
aur	Ranunculus haasii Soó, Ranunculus puberulus W.Koch, Ranunculus rectus Haas, 1 Expl. unbestimmbar	32	4	Germany	Nackel (Brandenburg, Landkreis Ostprignitz-Ruppin) / Von Barsikow in Richtung Nackel unmittelbar am Ortsschild von Nackel auf der rechten Seite am Graben, offener Standort. 40 m	Fundort 70	52.8268	12.5733	Lohwasser 2001:40, 67, 155
aur	Ranunculus haasii Soó, Ranunculus rectus Haas, 1 Expl. unbestimmbar	32	4	Germany	Lychen (Brandenburg, Landkreis Uckermark) / In Lychen an der Straße nach Fürstenberg links im Garten gegenüber einem kleinen Lebensmittelgeschäft, offener Standort. 60 m	Fundort 90	53.2128	13.3008	Lohwasser 2001:40, 67, 168
aur	Ranunculus inchoatus (Markl.) Ericsson	32	4	Finland	U, Tuusula, Purola		60.5101	25.0292	Rousi 1956:8 as R. auricomus ssp. inchoatus
aur	Ranunculus indecorus W.Koch	32	4	Switzerland	Egelsee, Grenchen, Solothurn		47.2046	7.38862	Häflinger 1943:323, 325
aur	Ranunculus indecorus W.Koch, Ranunculus palmularis O.Schwarz	32	4	Germany	Dosse (Brandenburg, Landkreis Havelland) / Wiese nahe der Dosse zwischen Rübehorst und Rhinow, offener Standort. 30 m	Fundort 67	52.7845	12.3262	Lohwasser 2001:40, 67, 153
aur	Ranunculus indecorus W.Koch, Ranunculus rotundatus Borch.-Kolb, 2 Expl. unbestimmbar	32	4	Germany	Groß-Ellingen (Sachsen-Anhalt, Landkreis Stendal) / Hinter Groß-Elingen in Richtung Hohenberg-Krusemark vor einzelstehender Kirche auf der rechten Seite auf einer Wiese und im Straßengraben, offener Standort. 40 m	Fundort 61	52.7114	11.955	Lohwasser 2001:40, 67, 149
aur	Ranunculus integerrimus (Julin) Borch.-Kolb, 2 Expl. unbestimmbar	32	4	Germany	Conow (Mecklenburg-Vorpommern, Landkreis Mecklenburg-Strelitz) / Ca. 1 km vor Conow, aus Richtung Feldberg kommend, links in einer Schilfwiese, offener Standort. 100 m	Fundort 96	53.3344	13.4921	Lohwasser 2001:41, 67, 171
aur	Ranunculus integerrimus (Julin) Borch.-Kolb, Ranunculus leptomeris Haas, Ranunculus palmularis O.Schwarz, Ranunculus phragmiteti, 2 Expl. unbestimmbar	32	4	Germany	Ueckermünde (Mecklenburg-Vorpommern, Landkreis Uecker-Randow) / In Ueckermünde nach der Abzweigung Richtung Pasewalk auf einer feuchten Wiese, offener Standort. 3 m	Fundort 123	53.7315	14.0355	Lohwasser 2001:41, 67, 188
aur	Ranunculus integerrimus (Julin) Borch.-Kolb, Ranunculus palmularis O.Schwarz, Ranunculus phragmiteti, 3 Expl. unbestimmbar	32	4	Germany	Kamp (Mecklenburg-Vorpommern, Landkreis Ostvorpommern) / Feuchte Wiese an der Straße zwischen Bargischow und Kamp auf der linken Seite, offener Standort. 1 m	Fundort 125	53.8414	13.8244	Lohwasser 2001:41, 67, 189
aur	Ranunculus integerrimus (Julin) Borch.-Kolb, Ranunculus puberulus W.Koch	32	4	Germany	Bahrdorf (Niedersachsen, Landkreis Helmstedt) / 3632; 4433850/5805200 / Wiese zwischen Bahrdorf und Saalsdorf auf der linken Seite, eingezäunte Weide, offener Standort. 70 m	Fundort 51	52.3761	11.0271	Lohwasser 2001:39, 67, 142
aur	Ranunculus integerrimus (Julin) Borch.-Kolb, Ranunculus puberulus W.Koch	32	4	Germany	Hämerten (Sachsen-Anhalt, Landkreis Stendal) / Elbwiesen bei Hämerten und am Rand eines Feldweges, offener Standort. 35 m	Fundort 62	52.5913	11.9952	Lohwasser 2001:40, 67, 150
aur	Ranunculus integerrimus (Julin) Borch.-Kolb, Ranunculus puberulus W.Koch	32	4	Germany	Jederitz (Sachsen-Anhalt, Landkreis Stendal) / Feuchte Wiese auf der rechten Seite zwischen Kuhlhausen und Jederitz vor Havelberg, offener Standort. 25 m	Fundort 66	52.7935	12.1626	Lohwasser 2001:40, 67, 152
aur	Ranunculus integerrimus (Julin) Borch.-Kolb, Ranunculus puberulus W.Koch	32	4	Germany	Zippelsförde (Brandenburg, Landkreis Ostprignitz-Ruppin) / An der Straße Alt-Ruppin in Richtung Dierberg, kurz nach der Rhinbrücke bei Zippelsförde, auf der rechten Seite feuchte Wiese, offener Standort. 40 m	Fundort 77	52.9905	13.0346	Lohwasser 2001:40, 67, 160
aur	Ranunculus integerrimus (Julin) Borch.-Kolb, Ranunculus puberulus W.Koch, Ranunculus rectus Haas	32	4	Germany	Kerzlin (Brandenburg, Landkreis Ostprignitz-Ruppin) / An der B 167 am Ortsausgang von Kerzlin in Richtung Wildberg auf der rechten Seite feuchte Wiese, offener Standort. 36 m	Fundort 72	52.885	12.641	Lohwasser 2001:40, 67, 156
aur	Ranunculus islandicus (Fagerstr. & Kvist) Ericsson	32	4	Iceland			64.7442	-18.227	Löve & Löve 1956:123 as R. auricomus; Ericsson 2001, only R. islandicus on Iceland	coordinates imprecise
aur	Ranunculus jastrabiensis Májovský ined.	32	4	Slovakia	Nizke Beskydy, Jastrabie nad Topľou (near the town of Vranov nad Topľou), NE, in oak-hornbeam forest, 7095d		48.8862	21.6848	Váchová & Májovský in Májovský et al. 1978:39; Marhold et al. 2007:491	original published: Váchová & Májovský in Májovský J. (1978) Index of chromosome numbers of Slovakian flora (Part 6). Acta Fac. Rer. Nat. Univ. Comen. Bot. 26:1-42. Leg.: Májovský et Králik
aur	Ranunculus kevoёnsis (Fagerstr. & G. Kvist) Ericsson	40	5	Finland	Lapponia inarensis, Utsjoki, Kevonsuu, in prato		69.7576	26.9904	Fagerström & Kvist 1980:306 as Ranunculus auricomus ssp. kevoënsis
aur	Ranunculus kunzii W.Koch	32	4	Switzerland	Lange Erlen, Basel		47.5749	7.6155	Häflinger 1943:323, 325
aur	Ranunculus laetevirens (Markl.) Ericsson	32	4	Finland	PK, Lieksa		63.3133	30.0229	Rousi 1956:8 as R. auricomus ssp. laetevirens, single cell with 61, probably 64, chromosomes
aur	Ranunculus laeteviridis W.Koch ined.	32	4	Lithuania	Kowno	Laet 1-5	54.8925	23.9021	Rutishauser 1954:8
aur	Ranunculus laticrenatus Hörandl & Gutermann	32	4	Austria	Niederösterreich, Marchtal, Hohenau an der March, Lange Wiese bei Kote 151: feuchter Auwald, 150 m s. m., 7467/2	Hö6585, Hö5581A	48.6059	16.9045	Hörandl & Gutermann 1999:108; Dobeš & Vitek 2000:50
aur	Ranunculus lepidus (Markl.) Ericsson	32	4	Finland	PK, Lieksa		63.3133	30.0229	Rousi 1956:8 as R. auricomus ssp. lepidus
aur	Ranunculus leptomeris Haas	32	4	Germany	Hohegeiß (Niedersachsen, Landkreis Goslar) / 4329; 3615000/5725400 / Ca. 500 m hinter Hohegeiß in Richtung Zorge rechts am Rand eines Baches und im Straßengraben, halbschattiger Standort. 530 m	Fundort 26	51.6512	10.6606	Lohwasser 2001:38, 67, 126
aur	Ranunculus leptomeris Haas, Ranunculus multisectus Haas, 2 Expl. unbestimmbar	32	4	Germany	Kassel Aue II (Hessen, Kreis Kassel-Stadt) / 4622; 3533950/5685350 / Park, Nähe Eingang Landaustraße, unter Bäumen und auf der Wiese, schattiger und offener Standort; Standort wird gemäht. Höhe 160 m.	Fundort 2	51.3019	9.48577	Lohwasser 2001:38, 67, 111
aur	Ranunculus leptomeris Haas, Ranunculus suevicus Borch.-Kolb	32	4	Germany	Zobbenitz (Sachsen-Anhalt, Ohrekreis) / Eichenwald in der Nähe des Reitplatzes von Zobbenitz, schattiger Standort. 60 m	Fundort 53	52.4111	11.3665	Lohwasser 2001:39, 67, 143
aur	Ranunculus linearis (Markl.) Ericsson	32	4	Finland	U, Myrskylä, Muttila		60.6762	25.8372	Rousi 1956:8 as R. auricomus ssp. linearis
aur	Ranunculus linkolae (Markl.) Ericsson	32	4	Finland	U, Taka-Töölö		60.1815	24.9177	Rousi 1956:8 as R. auricomus ssp. Linkolae
aur	Ranunculus lucorum (R. Engel) Borch.-Kolb	32	4	France	Ostheim bei Colmar	Grac 1-8	48.1652	7.40302	Häflinger 1943:323 als "Ranunculus gracillimus W.Koch & H. Kunz ined.", 325; Rutishauser 1954:9 as "R. gracillimus W.Koch ined." from "Forêt communale de Colmar"
aur	Ranunculus ludovicii Májovský ined.	32	4	Slovakia	Šarišské vrchy, Veľky Šariš, Šariš-hrad, 6993a		49.0544	21.1732	Májovský & Murín 1987:39; Marhold et al. 2007:492	Uhríková & Májovský 1986, leg. Dostál
aur	Ranunculus ludovicii Májovský ined.	32	4	Slovakia	Šarišské vrchy, Prešov, Okrúhliak, 6993c		49.0438	21.2484	Májovský & Murín 1987:39; Marhold et al. 2007:492	Uhríková & Májovský 1986, leg. Dostál
aur	Ranunculus luminarius Pignatti ex Greuter	32+2B	4	Italy	Valle Lumini		45.629	10.7564	Masci et al. 1994:102
aur	Ranunculus marsicus Guss. & Ten.	32	4	Italy	Piano delle Cinque miglia, 4 km from the town of Revisondoli, localitá Lago Lacore, 1243 s.l.m.		41.8868	14.002	Masci et al. 1987:172; Masci et al. 1994:101-102
aur	Ranunculus marsicus Guss. & Ten.	32	4	Italy	Abruzzo, Val Voltigno		42.3896	13.8274	Masci et al. 1994:102
aur	Ranunculus marsicus Guss. & Ten.	32	4	Italy	Abruzzo, Rivisondoli		41.8684	14.0684	Masci et al. 1994:102
aur	Ranunculus marsicus Guss. & Ten.	32	4	Italy	Abruzzo, Roccaraso		41.8501	14.0759	Masci et al. 1994:102
aur	Ranunculus marsicus Guss. & Ten.	32	4	Italy	Laghi Lacore, Piano delle Cinque Miglia, town of Rocca Pia (L'Aquila) Abruzzo, 1 240 m s.m.		41.8868	14.002	Sgorbati et al. 1989:221
aur	Ranunculus marsicus Guss. & Ten.	40	5	Italy	Pantani di Scanno, near Passo Godi along the road from Sulmona (L'Aquila) to Villetta Barrea (L'Aquila) Abruzzo, between 1 540 and 1 560 m s.m.		41.8606	13.9129	Sgorbati et al. 1989:221
aur	Ranunculus marsicus Guss. & Ten.	48	6	Italy	Pantani di Scanno, near Passo Godi along the road from Sulmona (L'Aquila) to Villetta Barrea (L'Aquila) Abruzzo, between 1 540 and 1 560 m s.m.		41.8606	13.9129	Sgorbati et al. 1989:221
aur	Ranunculus marsicus Guss. & Ten.	56	7	Italy	Pantani di Scanno, near Passo Godi along the road from Sulmona (L'Aquila) to Villetta Barrea (L'Aquila) Abruzzo, between 1 540 and 1 560 m s.m.		41.8606	13.9129	Sgorbati et al. 1989:221
aur	Ranunculus marsicus Guss. & Ten.	32	4	Italy	Abruzzo, Campo Felice		42.2043	13.4782	Spinosi 1998:88
aur	Ranunculus marsicus Guss. & Ten.	32	4	Italy	Abruzzo, Rocca di Cambio		42.2383	13.4901	Spinosi 1998:88
aur	Ranunculus marsicus Guss. & Ten.	32	4	Italy	Abruzzo, Rivisondoli		41.8684	14.0684	Spinosi 1998:88
aur	Ranunculus marsicus Guss. & Ten.	32	4	Italy	Abruzzo, Pescocostanzo Quarto Grande		41.8886	14.0741	Spinosi 1998:88
aur	Ranunculus marsicus Guss. & Ten.	40	5	Italy	Abruzzo, Pantani di Scanno		41.8447	13.9313	Spinosi 1998:88
aur	Ranunculus marsicus Guss. & Ten.	40	5	Italy	Abruzzo, Rivisondoli		41.8684	14.0684	Spinosi 1998:88
aur	Ranunculus marsicus Guss. & Ten.	40	5	Italy	Abruzzo, Roccaraso		41.8501	14.0759	Spinosi 1998:88
aur	Ranunculus marsicus Guss. & Ten.	48	6	Italy	Abruzzo, Pantani di Scanno		41.8447	13.9313	Spinosi 1998:88
aur	Ranunculus marsicus Guss. & Ten.	48	6	Italy	Abruzzo, Pescocostanzo Quarto Grande		41.8886	14.0741	Spinosi 1998:88
aur	Ranunculus marsicus Guss. & Ten.	48	6	Italy	Abruzzo, Roccaraso		41.8501	14.0759	Spinosi 1998:88
aur	Ranunculus marsicus Guss. & Ten.	56	7	Italy	Abruzzo, Pescocostanzo Quarto Grande		41.8886	14.0741	Spinosi 1998:88
aur	Ranunculus marsicus Guss. & Ten.	56	7	Italy	Abruzzo, Roccaraso		41.8501	14.0759	Spinosi 1998:88
aur	Ranunculus mediosectus Hörandl & Gutermann	32	4	Austria	Burgenland, Süd-Burgenland, Lafnitztal S Wolfau, 500 m SE Kote 318 (SW Oberwart), Feuchtwiese, 320 m s. m., 8762/4	Hö5605=Gu27884	47.2458	16.0877	Hörandl & Gutermann 1998:283; Dobeš & Vitek 2000:50
aur	Ranunculus mediosectus Hörandl & Gutermann	32	4	Austria	Burgenland, Süd-Burgenland, Stremtal, 1,1 km NNE Kemeten, Graben, Randbereich eines Bruchwaldes, 300 m s. m., 8762/2	Hö7219	47.2587	16.159	Hörandl & Gutermann 1998:285; Dobeš & Vitek 2000:50
aur	Ranunculus megalocaulis Hörandl & Gutermann	32	4	Austria	Niederösterreich, Wiener Becken, Ellender Wald, E Seite des Kugelbergs, ca. 2,4 km NNW Arbestthal: Hainbuchenwald, 220 m s. m., 7966/1	Hö6576A	48.0844	16.6923	Hörandl & Gutermann 1999:100; Dobeš & Vitek 2000:50
aur	Ranunculus megalocaulis Hörandl & Gutermann	32	4	Austria	Niederösterreich, Weinviertel, Satzer Hölzl, 1,7-2,4 km SE Kettlasbrunn: Eichenwald, Robinienforst, 240-270 m s. m., 7466/3	Hö6592B	48.5395	16.6826	Hörandl & Gutermann 1999:103; Dobeš & Vitek 2000:50
aur	Ranunculus megalocaulis Hörandl & Gutermann	32	4	Austria	Niederösterreich, Wiener Becken, Ellender Wald, Waldrand NE Schüttenberg, 2,5 km N Göttlesbrunn: Hainbuchenwald, 280 m s. m., 7466/3	Hö6577A	48.0811	16.7351	Hörandl & Gutermann 1999:103; Dobeš & Vitek 2000:50
aur	Ranunculus michalkoi Májovský ined.	32	4	Slovakia	Nizke Beskydy, Snina, 7098b		48.9944	22.1463	Májovský & Murín 1987:39; Marhold et al. 2007:492	Májovský
aur	Ranunculus nicklesi (Engel) Borch.-Kolb, Ranunculus puberulus W.Koch, 2 Expl. unbestimmbar	32	4	Germany	Querenhorst (Niedersachsen, Landkreis Helmstedt) / 3631; 4429600/5801600 / Ca. 1 km vor Querenhorst, aus Richtung Mackendorf kommend, im Straßengraben auf der rechten Seite, dahinter Getreidefeld, offener Standort. 115 m	Fundort 47	52.3432	10.9655	Lohwasser 2001:39, 67, 140
aur	Ranunculus notabilis Hörandl & Gutermann	16	2	Austria	Burgenland, Süd-Burgenland, Stremtal, Moschendorfer Wald ca. 1,8 km NE Strem: Hainbuchenwald, 220 m. s. m, 8964/2	Hö7223	47.048	16.4352	Hörandl & Gutermann 1998:271; Dobeš & Vitek 2000:50; Hörandl et al. 2000:55; Hörandl et al. 2001:166
aur	Ranunculus notabilis Hörandl & Gutermann	16	2	Austria	Burgenland, Süd-Burgenland, Stremtal, Moschendorfer Wald, Westteil N der Straße, 230 m s. m., 8964/2, Waldsumpf	Gu22026	47.0546	16.4385	Hörandl & Gutermann 1998:271; Dobeš & Vitek 2000:51
aur	Ranunculus notabilis Hörandl & Gutermann	16	2	Austria	Burgenland, Süd-Burgenland, Stremtal, 800 m W-WSW Hagensdorf im Burgenland: Hainbuchenwald, 200 m s. m., 8964/4	Hö7224	47.0122	16.4471	Hörandl & Gutermann 1998:271; Hörandl et al. 2000:55; Dobeš & Vitek 2000:51; Hörandl et al. 2001:166
aur	Ranunculus notabilis Hörandl & Gutermann	16	2	Austria	Strem valley, on margin of Moschendorfer forest, 1.5 km ENE Strem, 220 m, wet meadow and forest margin	7220 / NOT1	47.0054	16.4349	Hörandl et al. 2000:55; Hörandl et al. 2001:166; Hörandl et al. 2009:1197
aur	Ranunculus notabilis Hörandl & Gutermann	16	2	Austria	Burgenland, Moschendorfer Wald, Westteil, 8964.2, 230 m	Gu22026	47.048	16.4352	Hörand et al. 1997:199
aur	Ranunculus notabilis Hörandl & Gutermann	16	2	Austria	Burgenland, Südburgenland, Stremtal, Moschendorfer Wald, Rand 1,5 km ENE Strem, 220 m s. m., 8964/4	Gu27896=Hö5612	47.0485	16.4331	Hörand et al. 1997:199; Hörandl & Gutermann 1998:271; Dobeš & Vitek 2000:51
aur	Ranunculus cf. notabilis Hörandl & Gutermann × variabilis Hörandl & Gutermann	24	3	Austria	Strem valley, on margin of Moschendorfer forest, 1.5 km ENE Strem, 220 m, wet meadow and forest margin	hyb1	47.0054	16.4349	Hörandl et al. 2000:55
aur	Ranunculus cf. notabilis Hörandl & Gutermann × variabilis Hörandl & Gutermann	24	3	Austria	Strem valley, on margin of Moschendorfer forest, 1.5 km ENE Strem, 220 m, wet meadow and forest margin	hyb2	47.0054	16.4349	Hörandl et al. 2000:55
aur	Ranunculus obscurans (Markl.) Ericsson	32	4	Finland	V, Turku, Kupittaa		60.4349	22.2905	Rousi 1956:8 as R. auricomus ssp. obscurans
aur	Ranunculus obtruncatus (Markl.) Ericsson	32	4	Finland	V, Bromarv		59.99	23.0412	Rousi 1956:8 as R. auricomus ssp. obtruncatus
aur	Ranunculus obtusulus Markl.	32	4	Finland	U, Helsinki parish, Sjöskog		60.3482	24.8639	Rousi 1956:8 as R. auricomus ssp. obtrusulus
aur	Ranunculus oligandrus (Markl.) Ericsson	32	4	Finland	U, vicinity of Helsinki		60.2619	24.9117	Rousi 1956:8 as R. auricomus ssp. oligandrus
aur	Ranunculus oligandrus (Markl.) Ericsson	32	4	Finland	V, Halikko, Vuorentaka		60.3712	23.0497	Rousi 1956:8 as R. auricomus ssp. oligandrus
aur	Ranunculus oligandrus (Markl.) Ericsson	32	4	Finland	V, Lohja, Hiidenvesi		60.3743	24.1872	Rousi 1956:8 as R. auricomus ssp. oligandrus
aur	Ranunculus oligandrus (Markl.) Ericsson	32	4	Finland	U, Taka-Töölö		60.1815	24.9177	Rousi 1956:8 as R. auricomus ssp. oligandrus
aur	Ranunculus oligandrus (Markl.) Ericsson	32	4	Finland	U, Helsinki parish, Sottungsby		60.2833	25.1397	Rousi 1956:8 as R. auricomus ssp. oligandrus
aur	Ranunculus oligandrus (Markl.) Ericsson	32	4	Finland	U, Myrskylä, Muttila		60.6646	25.9166	Rousi 1956:8 as R. auricomus ssp. oligandrus
aur	Ranunculus oligandrus (Markl.) Ericsson	48	6	Finland	U, vicinity of Helsinki		60.2619	24.9117	Rousi 1956:8 as R. auricomus ssp. oligandrus
aur	Ranunculus opimus O.Schwarz	32	4	Germany	Weimar, Richtung Bad Berka (locus classicus)		50.9236	11.2984	Izmaiłow 1976:17
aur	Ranunculus opimus O.Schwarz, Ranunculus pseudopimus O.Schwarz, Ranunculus puberulus W.Koch, Ranunculus vertumnalis, 1 Expl. unbestimmbar	32	4	Germany	Escherode (Niedersachsen, Landkreis Göttingen) / 4623; 3546180/5687920 / Straßenrand und Böschung auf der linken Seite am Ortseingang von Escherode, aus Richtung Nieste kommend, offener Standort; Standort wird gemäht. 295m.	Fundort 5	51.3242	9.66145	Lohwasser 2001:38, 67, 113
aur	Ranunculus orbicans (Markl.) Ericsson	32	4	Finland	U, Helsinki, Eläintarha		60.1901	24.9278	Rousi 1956:8 as R. auricomus ssp. orbicans
aur	Ranunculus orthocladus (Markl.) Ericsson	32	4	Finland	V, Turku, Ruissalo		60.4335	22.1645	Rousi 1956:8 as R. auricomus ssp. orthocladus
aur	Ranunculus oxyodon Hörandl & Gutermann	32	4	Austria	Kärnten, Gurktaler Alpen, Wimitz, Breitenstein, NE der Brücke (NE St. Veit an der Glan), 520 m s. m., 9152/3	Hö5716	46.8048	14.3933	Hörand et al. 1997:199; Hörandl & Gutermann 1998:295; Dobeš & Vitek 2000:51	Hörandl & Gutermann 1998:295: 9152/3: Breitenstein, NE d. Brücke (NE St. Veit a.d. Glan), 520 m, Mähwiese
aur	Ranunculus palmularis O.Schwarz	32	4	Germany	Weimar, Nohraer Holz (locus classicus)		50.9589	11.2502	Izmaiłow 1976:17
aur	Ranunculus pannonicus Soó	32	4	Austria	Niederösterreich, Marchtal, Sierndorf a.d. March, Alte Wiesen 0,2 km S Jagdhaus Kote 149, 150 m s. m., 7467/3	Hö5576=Gu27873	48.5108	16.8867	Hörand et al. 1997:199; Hörandl & Gutermann 1998:298; Dobeš & Vitek 2000:51
aur	Ranunculus pannonicus Soó	24	3	Slovakia	Ipeľsko-rimavská brázda, Drienovo, Krupinská vrchovina Hills, Drienovská dolina valley, 7780c		48.2497	19.3351	Májovský, Murín et al. 1987:34; Marhold et al. 2007:490	original published: Murín & Májovský in Májovský J. (1978) Index of chromosome numbers of Slovakian flora (Part 6). Acta Fac. Rer. Nat. Univ. Comen. Bot. 26:1-42. Leg.: Činčura et Votavová
aur	Ranunculus pannonicus Soó	24	3	Slovakia	Ipeľsko-rimavská brázda, Cerovo, 7785c		48.2533	19.1579	Májovský, Murín et al. 1987:35; Marhold et al. 2007:490	Murín & Májovský 1986, Činčura et Votavová
aur	Ranunculus pentadactylus Hörandl & Gutermann	32	4	Austria	Niederösterreich, Marchtal, Stillfried an der March, Auen ca. 0,1-0,3 km E Bahnhaltestelle: Auwald, Säume, 145 m s. m., 7567/3	Hö5572A, Gu22864	48.4095	16.8478	Hörandl & Gutermann 1999:116; Dobeš & Vitek 2000:51
aur	Ranunculus phragmiteti Haas	32	4	Austria	Niederösterreich, Waldviertel, Oberedlitz-Niederetlitz, =,2 km N Bahn-Haltestelle, 460 m s. m., 7157/2	Hö5684	48.8765	15.2813	Hörand et al. 1997:199; Hörandl & Gutermann 1998:275; Dobeš & Vitek 2000:51
aur	Ranunculus phragmiteti, 2 Expl. unbestimmbar	32	4	Germany	Grambin (Mecklenburg-Vorpommern, Landkreis Uecker-Randow) / Am Ortseingang von Grambin, aus Richtung Ueckermünde kommend, rechts auf einer feuchten Wiese am Hochwasserschutzdeich, offener Standort. 3 m	Fundort 124	53.7526	14.0256	Lohwasser 2001:41, 67, 188
aur	Ranunculus praetermissus Hörandl & Gutermann	32	4	Austria	Oberösterreich, Alpenvorland, 1,4 km WNW Natternbach, 0,4 km NW Mayrhof, NNW Peuerbach: feuchte Mähwiese, 460 m s. m., 7548/3	Hö6635A=Gu29553A	48.3978	13.7324	Hörandl & Gutermann 1998:279–280; Dobeš & Vitek 2000:51
aur	Ranunculus praetermissus Hörandl & Gutermann	32	4	Austria	Oberösterreich, Innviertel, Thal, Pfudabach, 0,7 km W-WNW Sigharting NE Andorf: feuchte Mähwiese, 340 m s. m., 7647/2	Hö6632A=Gu29550A	48.3963	13.5896	Hörandl & Gutermann 1998:280; Dobeš & Vitek 2000:52
aur	Ranunculus prosseri Dunkel	32	4	Italy	Trento, Croviana		46.3424	10.9017	unpublished count T. Gregor 2007
aur	Ranunculus prosseri Dunkel	32	4	Italy	Trento, Mezzolombarda		46.2113	11.0934	unpublished count T. Gregor 2007
aur	Ranunculus pseudobinatus Soó	24	4	Slovakia	Slovenské rudohorie, Muránska Zdychava, Marková hill, 7286d		48.7339	20.1468	Májovský, Murín et al. 1987:35; Marhold et al. 2007:490	original published: Murín & Váchová in Májovský J. (1978) Index of chromosome numbers of Slovakian flora (Part 6). Acta Fac. Rer. Nat. Univ. Comen. Bot. 26:1-42. Leg.: Májovký
aur	Ranunculus pseudobinatus Soó	24	4	Slovakia	Vtáčnik, Prochot, Vtáčnik, 7371d		48.6239	18.6398	Májovský, Murín et al. 1987:35; Marhold et al. 2007:492	Murín & Májovský 1986, leg. Májovský
aur	Ranunculus pseudopimus O.Schwarz	32	4	Germany	Weimar, Alter Friedhof, at the Fürstengruft (locus classicus)		50.9745	11.3255	Izmaiłow 1976:17
aur	Ranunculus pseudopimus O.Schwarz	32	4	Germany	Isserstedt forest between Jena and Weimar		50.9591	11.5276	Izmaiłow 1976:17
aur	Ranunculus pseudopimus O.Schwarz, Ranunculus rotundatus Borch.-Kolb, 2 Expl. unbestimmbar	32	4	Germany	Hoher Hagen (Niedersachsen, Landkreis Göttingen) / 4524; 3553100/5705900 / Standortbeschreibung: An der Auffahrt zum Hohen Hagen von Dransfeld aus am Waldrand (Fichten, Hainbuche, Ahorn) beim Forsthaus, schattiger Standort. 395 m.	Fundort 11	51.4852	9.7634	Lohwasser 2001:38, 67, 117
aur	Ranunculus pseudosilvicola Soó	32	4	Slovakia	Devínska Kobyla, Brastislava-Karlova Ves, Králova lúka [Kraľova hora hill], 7868a		48.16	17.0319	Uhríková & Májovský in Löve 1980:727, leg. Feráková; Májovský, Murín et al. 1987:37; Marhold et al. 2007:491	Májovský, Murín et al. 1987:37, Uhriková et Májovský 1986, leg. Votavová
aur	Ranunculus pseudovertumnalis Haas, Ranunculus rotundatus Borch.-Kolb, 2 Expl. unbestimmbar	32	4	Germany	Nienhagen (Niedersachsen, Landkreis Göttingen) / 4623; 3546450/5689700 / Feuchte Wiese am Ortseingang von Nienhagen aus Richtung Escherode kommend, gegenüber des Sportplatzes, offener Standort. 260 m.	Fundort 6	51.3401	9.66556	Lohwasser 2001:38, 67, 114
aur	Ranunculus pseudovertumnalis, Ranunculus puberulus W.Koch, 1 Expl. unbestimmbar	32	4	Germany	Lucklum (Niedersachsen, Landkreis Wolfenbüttel) / 3730; 4410300/5786400 / Wiese am Ortseingang von Lucklurn aus Richtung Wolfenbüttel kommend, offener Standort. 140 m	Fundort 44	52.2039	10.6864	Lohwasser 2001:39, 67, 138
aur	Ranunculus puberulus W.Koch	32	4	Switzerland	Mühlental, Schaffhausen	Pub 1-25	47.7341	8.61885	Häflinger 1943:323, 325; Rutishauser 1954:8
aur	Ranunculus puberulus W.Koch, Ranunculus rectus Haas	32	4	Germany	Weggun (Brandenburg, Landkreis Uckermark) / Abhang zum Priestersee, halbschattiger und schattiger Standort. 95 m	Fundort 101	53.3292	13.5791	Lohwasser 2001:41, 67, 174
aur	Ranunculus puberulus W.Koch, Ranunculus roessleri Borch.-Kolb, Ranunculus rotundatus Borch.-Kolb, 1 Expl. unbestimmbar	32	4	Germany	Behnsdorf (Sachsen-Anhalt, Ohrekreis) / 3632; 4441750/5797850 / Hinter Behnsdorf in Richtung Hödingen auf der linken Seite kleine Wiese und Graben ohne Wasser, offener Standort. 138 m	Fundort 49	52.311	11.1444	Lohwasser 2001:39, 67, 141
aur	Ranunculus puberulus W.Koch, Ranunculus rotundatus Borch.-Kolb, 2 Expl. unbestimmb[ar]	32	4	Germany	Schönhausen (Mecklenburg-Vorpommern, Landkreis Mecklenburg-Strelitz) / Unmittelbar vor dem Ortsschild von Schönhausen, aus Richtung Matzdorf kommend, rechts an der Straßenböschung unter einer Eschenallee, offener und halbschattiger Standort. 90 m	Fundort 119	53.5617	13.696	Lohwasser 2001:41, 67, 185
aur	Ranunculus puberulus W.Koch, Ranunculus rotundatus Borch.-Kolb, Ranunculus suevicus Borch.-Kolb	32	4	Germany	Pampow (Mecklenburg-Vorpommern, Landkreis Uecker-Randow) / An der Straße Pampow in Richtung Mewegen, gegenüber Haus Pampewer Straße Nr. 1, im Bruchwald, schattiger Standort. 15 m	Fundort 114	53.5252	14.2618	Lohwasser 2001:41, 67, 182
aur	Ranunculus pullus (Markl.) Ericsson	32	4	Finland	U, vicinity of Helsinki		60.2619	24.9117	Rousi 1956:8 as R. auricomus ssp. pullus
aur	Ranunculus rotundatus Borch.-Kolb	32	4	Germany	Wuthenow (Brandenburg, Landkreis Ostprignitz-Ruppin) / Unmittelbar vor dem Ortsschild von Wuthenow, aus Richtung Gildenhall kommend, rechts feuchte Wiese und feuchter Wald am Ruppiner See, offener und halbschattiger Standort. 30 m	Fundort 75	52.9108	12.8369	Lohwasser 2001:40, 67, 158
aur	Ranunculus rotundatus Borch.-Kolb	32	4	Germany	Groß-Biewende (Niedersachsen, Landkreis Wolfenbüttel) / 3929; 3611800/5774050 / Mischwald bei Groß-Biewende (Nähe Grüner Tempel), schattiger Standort. 115 m	Fundort 41	52.0889	10.6301	Lohwasser 2001:39, 67, 136
aur	Ranunculus rotundatus Borch.-Kolb, 1 Expl. unbestimmbar	32	4	Germany	Barterode Mühle (Niedersachsen, Landkreis Göttingen) / 4424; 3553000/5711700 / Feuchte Wiese an der Mühle bei Barterode, offener Standort. 235 m	Fundort 13	51.5373	9.76283	Lohwasser 2001:38, 67, 118
aur	Ranunculus rotundatus Borch.-Kolb, Ranunculus suevicus Borch.-Kolb, 2 Expl. unbestimmbar	32	4	Germany	Lüttenhagen I (Mecklenburg-Vorpommern, Landkreis Mecklenburg-Strelitz) / Im Ort an der Bushaltestelle, offener und halbschattiger Standort. 120 m	Fundort 97	53.3373	13.3845	Lohwasser 2001:41, 67, 172
aur	Ranunculus slovacus Soó	32	4	Slovakia	Veľká Fatra, Turecká, Mt. Turecká, 7180d		48.853	19.0891	Májovský, Murín et al. 1987:36; Marhold et al. 2007:490	Murín & Májovský 1978, leg. Májovský & Murín
aur	Ranunculus stabilis (Markl.) Ericsson	32	4	Finland	U, Myrskylä, Muttila		60.6762	25.8372	Rousi 1956:8 as R. auricomus ssp. stabilis
aur	Ranunculus stenodon (Markl.) Ericsson	32	4	Finland	U, Helsinki, Haaga		60.223	24.8951	Rousi 1956:8 as R. auricomus ssp. stenodon
aur	Ranunculus styriacus Hörandl & Gutermann	32	4	Austria	Burgenland, Mittel-Burgenland, Günser Gebirge, Hammer, 0,6 km S der Kirche, Grabenoberhang: Laubmischwald, 300-320 m s. m., 8564/4	Hö6444	47.4038	16.4445	Hörandl & Gutermann 1998:311; Dobeš & Vitek 2000:52
aur	Ranunculus suborbicularis Dunkel	ca. 32	4	Germany	Thüringen, Weimar, Webicht		50.983	11.3524	unpublished count T. Gregor 2007
aur	Ranunculus suborbicularis Dunkel	32	4	Germany	Berlin-Zehlendorf: Wannsee, Glienicker Volkspark, Nähe Königsstraße, östl. vom Schloß, unter Eiche	R1	52.4158	13.0975	Melzheimer et al. 1976:348
aur	Ranunculus suborbicularis Dunkel	32	4	Germany	Berlin-Zehlendorf: Wannsee, Glienicker Volkspark, Nähe Königsstraße, östl. vom Schloß, unter Eiche	R16	52.4158	13.0975	Melzheimer et al. 1976:348
aur	Ranunculus suborbicularis Dunkel	32	4	Germany	Berlin-Charlottenburg: Schlosspark, Nähe Lustschlößchen, unter Eiche	R2	52.5275	13.2953	Melzheimer et al. 1976:348
aur	Ranunculus subpannonicus Soó	32	4	Slovakia	Ipeľsko-rimavská brázda, Blhovce, 7785b		48.275	19.954	Májovský, Murín et al. 1987:35, location somewhat different; Marhold et al. 2007:492	Murín & Májovský et al. 1978, leg. Májovský & Murín
aur	Ranunculus subpannonicus Soó	32	4	Slovakia	Slovenský kras, Silica, Ľadnica [Silická ľadnica] cave, 7489c		48.5491	20.5037	Májovský, Murín et al. 1987:35, location somewhat different; Marhold et al. 2007:492	Májovský, Murín et al. 1987: 35, location somewhat different; Marhold et al. 1987:35
aur	Ranunculus subpannonicus Soó	32	4	Slovakia	Slanské vrchy, Slanec, castle, 7394d		48.638	21.4711	Májovský, Murín et al. 1987:35, location somewhat different; Marhold et al. 2007:492	Májovský & Murín 1986
aur	Ranunculus subpolonicus ined.	32	4	Slovakia	Bukovké vrchy, Ruský Potok, site "Kopanina", 69100c		49.0289	22.4056	Májovský, Murín et al. 1987:37; Marhold et al. 2007:490	original published: Murín & Májovský in Májovský J. (1978) Index of chromosome numbers of Slovakian flora (Part 6). Acta Fac. Rer. Nat. Univ. Comen. Bot. 26:1-42. Leg.: Májovký et Murín
aur	Ranunculus subtatricus Jasiewicz	32	4	Poland	Tatra Mountains 940-1250 m		49.3004	20.0607	Skalinska, M. Potrowicz, Sokołowska-Kulczycka et al. 1961:465
aur	Ranunculus tenebricans (Markl.) Ericsson	32	4	Finland	U, Helsinki, Haaga		60.223	24.8951	Rousi 1956:8 as R. auricomus ssp. tenebricans
aur	Ranunculus transtibiscensis Soó	32	4	Slovakia	Tríbeč, Oponice-hrad [under the castle], 7574d		48.4484	18.1563	Májovský, Murín et al. 1987:34; Marhold et al. 2007:490	original published: Váchová & Májovský in Májovský J. (1978) Index of chromosome numbers of Slovakian flora (Part 6). Acta Fac. Rer. Nat. Univ. Comen. Bot. 26:1-42.
aur	Ranunculus truniacus Hörandl & Gutermann	32	4	Austria	Salzburg, Tennengau, Paß Gschütt, an der Straße 0,8 km W-WSW der Paßhöhe: feuchter Mähwiesenrand, 916 m s. m, 8446/2	Hö6675	47.5907	13.495	Hörandl & Gutermann 1998:301; Dobeš & Vitek 2000:52
aur	Ranunculus udicola Hörandl & Gutermann	32	4	Austria	Steiermark, Oststeirisches Hügelland, Riegersburg, Graben N vom nördlichen Teich: Bachauwald, 330 m s. m., 8961/4	Gu27908A=Hö5619A	47.0082	15.9295	Hörand et al. 1997:199; Hörandl & Gutermann 1999:129
aur	Ranunculus valdesii Grau	32	4	Spain	Madrid, Sierra da Guadarrama, Rascafría	SEV 128350	40.9084	-3.88935	Diosdado & Pastor 1996:169; location supplemented from herbarium voucher
aur	Ranunculus variabilis Hörandl & Gutermann	32	4	Austria	Burgenland, Süd-Burgenland, Stremtal, Moschendorfer Wald, am Rand 1,5 km ENE Strem, 220 m s. m., 8964/1, Feuchtwiese	Hö7221	47.0054	16.4349	Hörandl & Gutermann 1998:305; Hörandl et al. 2000:55; Dobeš & Vitek 2000:52; Hörandl et al. 2001:166
aur	Ranunculus variabilis Hörandl & Gutermann	32	4	Austria	Burgenland, Süd-Burgenland: 8964/1: Stremtal, 800 m W-WSW Hagensdorf i. Bgld., 200 m, Hainbuchenwald	Hö7225	47.0122	16.4471	Hörandl & Gutermann 1998:305; Hörandl et al. 2000:55; Dobeš & Vitek 2000:52; Hörandl et al. 2001:166
aur	Ranunculus variabilis Hörandl & Gutermann	32	4	Austria	Niederösterreich, Wienerwald, Klausenleopoldsdorf, Agsbachtal 0,2 km NNE Kote 396: feuchte Mähwiese, 400 m s. m., 7862/3	Hö5591, Hö8208	48.1012	16.0091	Hörandl & Gutermann 1998:306; Dobeš & Vitek 2000:53; Hörandl et al. 2001:166
aur	Ranunculus variabilis Hörandl & Gutermann	32	4	Austria	Niederösterreich, Wienerwald, Hainbach, ca. 2,3 km NNE Klausenleopoldsdorf: feuchte Mähwiese, 440 m s. m.,7862/3	Hö8206	48.1066	16.0287	Hörandl & Gutermann 1998:306; Dobeš & Vitek 2000:53; Hörandl et al. 2001:166
aur	Ranunculus variabilis Hörandl & Gutermann	32	4	Austria	Niederösterreich, Wienerwald, Gruberau, 0,6 km WSW Gasthof Schusternazl: feuchte Mähwiese, 390 m s. m., 7862/4	Hö8205	48.1139	16.0943	Hörandl & Gutermann 1998:306; Dobeš & Vitek 2000:53; Hörandl et al. 2001:166
aur	Ranunculus variabilis Hörandl & Gutermann	32	4	Austria	Niederösterreich, Bucklige Welt, Spratzbach ca. 1,6 km [NNE. of] Blumau, 8463/4	Hö8212	47.5848	16.2244	Hörandl & Gutermann 1998:306; Dobeš & Vitek 2000:53; Hörandl et al. 2001:166
aur	Ranunculus variabilis Hörandl & Gutermann	32	4	Austria	Niederösterreich, Bucklige Welt, Spratzau, 2,9 km SE Lichtenegg (NW Kirchschlag in der Bucklingen Welt): feuchte Mähwiese, 550 m s. m., 8463/1:	Hö5641, Hö8210	47.5846	16.2419	Hörandl & Gutermann 1998:306; Dobeš & Vitek 2000:53; Hörandl et al. 2001:166	coordinates for Spratzau
aur	Ranunculus variabilis Hörandl & Gutermann	32	4	Austria	Niederösterreich, Bucklige Welt, Spratzau, knapp E der Fahrnermühle (NNW Kirchschlag in der Bucklingen Welt): feuchte Mähwiese, 550 m s. m., 8463/2	Hö5642, Hö8211	47.5846	16.2419	Hörandl & Gutermann 1998:306; Dobeš & Vitek 2000:53; Hörandl et al. 2001:166	coordinates for Spratzau
aur	Ranunculus variabilis Hörandl & Gutermann	32	4	Austria	Niederösterreich, Waldviertel, Kamptal, Töbernitzbach 1 km WSW Wegscheid: Mähwiese, 380 m s. m., 7358/4	Hö5656, Hö8215	48.6103	15.4792	Hörandl & Gutermann 1998:307; Dobeš & Vitek 2000:52; Hörandl et al. 2001:166
aur	Ranunculus variabilis Hörandl & Gutermann	32	4	Austria	Oberösterreich, Mühlviertel, an der Straße 2 km ESE Freistadt, gegenüber vom Gehöft Zeitlhofer: Mähwiese, 670 m s. m., 7453/3	Hö8217	48.5009	14.5245	Hörandl & Gutermann 1998:307; Dobeš & Vitek 2000:53; Hörandl et al. 2001:166
aur	Ranunculus variabilis Hörandl & Gutermann	32	4	Austria	Oberösterreich, Mühlviertel, an der Straße 0,9 km E Kefermarkt: Mähwiese, 520 m s. m., 7553/3	Hö8218	48.4425	14.5519	Hörandl & Gutermann 1998:307; Dobeš & Vitek 2000:53; Hörandl et al. 2001:166
aur	Ranunculus variabilis Hörandl & Gutermann	32	4	Austria	Niederösterreich, Waldviertel, Zwettl, linkes Kampufer 0,2-0,5 km SSW Propstei: Mähwiese, 520 m s. m., 7456/2 Mähwiese	Hö5664, Hö8216	48.6033	15.1661	Hörandl & Gutermann 1998:307; Dobeš & Vitek 2000:53; Hörandl et al. 2001:166
aur	Ranunculus variabilis Hörandl & Gutermann	32	4	Austria	Niederösterreich, Waldviertel, Rosenburg, linkes Taffa-Ufer; Lausgrabenende: Mähwiesen, 260 m s. m., 7359/4	Hö5649, Hö8214	48.6283	15.644	Hörandl & Gutermann 1998:307; Dobeš & Vitek 2000:53; Hörandl et al. 2001:166
aur	Ranunculus variabilis Hörandl & Gutermann	32	4	Austria	Hausruck: Near Kantner (Grubmühlbach)	Hö8227	48.1296	13.5706	Hörandl et al. 2001:166	coordinates for Hausruck
aur	Ranunculus variabilis Hörandl & Gutermann	32	4	Austria	Hausruck: Near Schauburg (Moosbach)	Hö8228	48.1296	13.5706	Hörandl et al. 2001:166	coordinates for Hausruck
aur	Ranunculus variabilis Hörandl & Gutermann	32	4	Austria	Mühlviertel: NE Reichenau i. Mühlkreis (Grasbach)	Hö8222	48.4586	14.3587	Hörandl et al. 2001:166
aur	Ranunculus variabilis Hörandl & Gutermann	32	4	Austria	Burgenland, Südburgenland, Stremtal, E Strem, bei Kote 221 1 kn NNE vom Zollhaus, 220 m s. m., 8964/4	GH-6B	47.0415	16.4301	Hörand et al. 1997:199; Dobeš & Vitek 2000:52
aur	Ranunculus variabilis Hörandl & Gutermann	32	4	Austria	Burgenland, Südburgenland, Stremtal, Grenzgraben 0,5 km S Luising, 200 m s. m., 8964/4	GH-3	47.0018	16.4839	Hörand et al. 1997:199; Dobeš & Vitek 2000:52
aur	Ranunculus variabilis Hörandl & Gutermann	32	4	Austria	Burgenland, Südburgenland, Pinkatal, Unterschützen, Ortsrand 0,4 km NW der Kirche, 330 m s. m., 8663/3, feuchte Mähwiese	Gu27880=Hö5601, Hö7218	47.3175	16.2081	Hörand et al. 1997:199; Hörandl & Gutermann 1998:301; Dobeš & Vitek 2000:52; Hörandl et al. 2000:55; Hörandl et al. 2001:166
aur	Ranunculus variabilis Hörandl & Gutermann	32	4	Austria	Burgenland, Süd-Burgenland, Stremtal, Strembrücke 0,3 km W Hagensdorf im Burgenland, 200 m s. m., 8964/1, feuchte Mähwiese	GH-4	47.0129	16.4524	Hörand et al. 1997:199; Hörandl & Gutermann 1998:305; Dobeš & Vitek 2000:52
aur	Ranunculus variabilis Hörandl & Gutermann	32	4	Austria	Niederösterreich, Bucklige Welt, am Rabnitzbach 0,3 km SSW Blumau (NNE Kirchschlag in der Bucklingen Welt), 410 m s. m., 8463/4	Hö5643	47.5437	16.3116	Hörand et al. 1997:199; Hörandl & Gutermann 1998:306; Dobeš & Vitek 2000:53
aur	Ranunculus cf. variabilis Hörandl & Gutermann	32	4	Austria	Burgenland, Südburgenland, Stremtal, Limpigraben, 1 km N Strem, W des Grabens, 200 m s. m., 8964/1	GH-7	47.0609	16.4135	Hörand et al. 1997:199; Dobeš & Vitek 2000:53
aur	Ranunculus varicus O.Schwarz	32	4	Germany	Weimar, Schwarzer Graben (locus classicus)		50.9622	11.3145	Izmaiłow 1976:17
aur	Ranunculus vertumnalis O.Schwarz	32	4	Germany	vicinity of Rudolstadt		50.7263	11.3214	Izmaiłow 1976:17
aur	Ranunculus vertumnalis O.Schwarz	32	4	Germany	Weimar, Park Belvedere (locus classicus )		50.9469	11.3529	Izmaiłow 1976:17
aur	Ranunculus vertumnalis O.Schwarz	32	4	Germany	vicinity of Saalfeld		50.668	11.3749	Izmaiłow 1976:17
aur	Ranunculus vertumnalis O.Schwarz	32	4	Germany	Gleisberg near Jena		50.9414	11.6536	Izmaiłow 1976:17
aur	Ranunculus vertumnalis O.Schwarz	32	4	Germany	Berlin-Zehlendorf: Wannsee, Böttcherberg, SW "Kapelle", Laubmischwald	R6	52.4117	13.1053	Melzheimer et al. 1976:348
aur	Ranunculus vertumnalis O.Schwarz	32	4	Germany	Berlin-Reinickendorf: Lübars, am Tegeler Fließ südl. Eichwerder, tief im Schilf	R12	52.623	13.3341	Melzheimer et al. 1976:348
aur	Ranunculus vertumnalis O.Schwarz	32	4	Germany	Berlin-Reinickendorf: Lübars, am Tegeler Fließ südl. Eichwerder, nasse Wiese	R13	52.623	13.3341	Melzheimer et al. 1976:348
aur	Ranunculus walo-kochii Hörandl & Gutermann	32	4	Switzerland	Rümlang, Kanton Zürich	Aur 1-5	47.4477	8.521	Häflinger 1943:323, 325; Rutishauser 1954:8 als "R. auricomus (L) em. W.Koch"
cass	Ranunculus allemannii Braun-Blanq.	48	6	Switzerland	Isola, Engadin; [1810 m]		46.411	9.74002	Häflinger 1943:323, 325; Vuillemin 1990:211
cass	Ranunculus allemannii Braun-Blanq.	32	4	Switzerland	Canton Grisons, Sils-Maria; 1800 m		46.4301	9.75326	Vuillemin 1990:211
cass	Ranunculus allemannii Braun-Blanq.	48	6	Switzerland	Canton Grisons, Sils-Maria; 1800 m		46.4301	9.75326	Vuillemin 1990:211
cass	Ranunculus allemannii Braun-Blanq.	48	6	Switzerland	Canton Grisons, Champfersee; 1790 m		46.4693	9.80592	Vuillemin 1990:211
cass	Ranunculus allemannii Braun-Blanq.	48	6	Switzerland	Canton Grisons, Val Bever; 1780 m		46.5606	9.83846	Vuillemin 1990:211
cass	Ranunculus allemannii Braun-Blanq.	48	6	Switzerland	Canton Grisons, St. Moritz; 1790 m		46.4976	9.85039	Vuillemin 1990:211
cass	Ranunculus allemannii Braun-Blanq.	48	6	Switzerland	Canton Grisons, Berninahäuser; 2000 m		46.4482	9.96588	Vuillemin 1990:211
cass	Ranunculus allemannii Braun-Blanq.	48	6	Switzerland	Canton Grisons, Bernina; 2100 m		46.4107	10.0268	Vuillemin 1990:211
cass	Ranunculus allemannii Braun-Blanq.	64	8	Switzerland	Canton Grisons, Val Bever; 1780 m		46.5606	9.83846	Vuillemin 1990:211
cass	Ranunculus allemannii Braun-Blanq.	47	6	Switzerland	Canton Grisons, Sertigtal; 1800 m		46.7265	9.84854	Vuillemin 1990:211
cass	Ranunculus allemannii Braun-Blanq.	47	6	Switzerland	Canton Grisons, Bernina; 2100 m		46.4107	10.0268	Vuillemin 1990:211
cass	Ranunculus auricomus s.l	32	4	Poland	Wymysłów near Miechów (Querceto-Carpinetum); 50°25'/20°17'	W/90, W/97	50.4167	20.2833	Jankun & Izmaiłow 1964:134 as Ranunculus cassubicus subsp. "undefined"
cass	Ranunculus auricomus s.l	44	6	Poland	Cisie near Miechów (Carpineto-Quercetum); 50°25'/20°6'	C/78–81	50.4167	20.1	Jankun & Izmaiłow 1964:134 as Ranunculus cassubicus subsp. "undefined"
cass	Ranunculus auricomus s.l	32	4	Poland	Primeval forest of Białowieża (Querceto-Carpinetum); 52°44'/23°53'	PB/195–198	52.7333	23.8833	Jankun & Izmaiłow 1964:134 as Ranunculus cassubicus subsp. "undefined"; Skalińska & al. 1964:48
cass	Ranunculus auricomus s.l	40	5	Poland	Kalina Wielka (Querceto-Carpinetum); 50°23'/20°9'	K/182–188	50.3833	20.15	Jankun & Izmaiłow 1964:134 as Ranunculus cassubicus subsp. "undefined"; Skalińska & al. 1964:48
cass	Ranunculus auricomus s.l	32	4	Poland	Dolina Kluczwody (Querceto-Carpinetum); 50°5'/19°50'	DK/237	50.0833	19.8333	Jankun & Izmaiłow 1964:135 as Ranunculus cassubicus subsp. "undefined"
cass	Ranunculus auricomus s.l	32	4	Poland	Ojców (border of deciduous wood); 50°18'/19°50'	O/294–297	50.3	19.8333	Jankun & Izmaiłow 1964:135 as Ranunculus cassubicus subsp. "undefined"
cass	Ranunculus auricomus s.l	32	4	Poland	Zaragów near Miechów (Querceto-Carpinetum); 50°19'/20°9'	Z/98	50.3167	20.15	Jankun & Izmaiłow 1964:135 as Ranunculus cassubicus subsp. "undefined"
cass	Ranunculus auricomus s.l	40	5	Poland	Dulowa (alder wood); 50°9'/19°32'	D/274–276	50.15	19.5333	Jankun & Izmaiłow 1964:135 as Ranunculus cassubicus subsp. "undefined"
cass	Ranunculus auricomus s.l	40	5	Poland	Dulowa (alder wood); 50°9'/19°32'	D/278–289	50.15	19.5333	Jankun & Izmaiłow 1964:135 as Ranunculus cassubicus subsp. "undefined"
cass	Ranunculus auricomus s.l	40	5	Poland	Dolina Kluczwody (Querceto-Carpinetum); 50°5'/19°50'	DK/238–241	50.0833	19.8333	Jankun & Izmaiłow 1964:135 as Ranunculus cassubicus subsp. "undefined"
cass	Ranunculus auricomus s.l	48	6	Poland	Dulowa (alder wood); 50°9'/19°32'	D/277	50.15	19.5333	Jankun & Izmaiłow 1964:135 as Ranunculus cassubicus subsp. "undefined"
cass	Ranunculus auricomus s.l	44	6	Poland	Klonów (Querceto-Carpinetum); 50°20'/20°11'	Kl/102–103	50.3333	20.1833	Jankun & Izmaiłow 1964:135 as Ranunculus cassubicus subsp. "undefined"
cass	Ranunculus auricomus s.l	32	4	Poland	Budy Głogowskie near Rzeszów (Querceto-Carpinetum); 50°11/21°54'	BG/27–28	50.1833	21.9	Jankun & Izmaiłow 1964:135 as Ranunculus cassubicus subsp. "undefined"; Skalińska & al. 1964:48
cass	Ranunculus auricomus s.l	40	5	Poland	Dolina Kluczwody (Querceto-Carpinetum); 50°5'/19°50'	DK/229–236	50.0833	19.8333	Jankun & Izmaiłow 1964:135 as Ranunculus cassubicus subsp. "undefined"; Skalińska & al. 1964:48 from Jurassic Valley Kluczwoda ...
cass	Ranunculus auricomus s.l	32	4	Poland	Las Wolski near Kraków (Querceto-Carpinetum); 50°4'/19°52'	LW/200–205	50.0667	19.8667	Jankun & Izmaiłow 1964:135 as Ranunculus cassubicus subsp. near to Pawlowskii; Skalińska & al. 1964:48
cass	Ranunculus auricomus s.l	40	5	Poland	Las Wolski near Kraków (Querceto-Carpinetum); 50°4'/19°52'	LW/206	50.0667	19.8667	Jankun & Izmaiłow 1964:135 as Ranunculus cassubicus subsp. near to Pawlowskii; Skalińska & al. 1964:48
cass	Ranunculus auricomus s.l	40	5	Poland	Niedzica scrub, c. 500 m a.s.l.; 49°25'/20°18'	N/302–305	49.4167	20.3	Jankun & Izmaiłow 1964:136 as Ranunculus cassubicus subsp. "undefined"
cass	Ranunculus auricomus s.l	40	5	Poland	Boczów hornbeam scrub (range of Gorce)	B/326–340	49.5333	20.4	Jankun & Izmaiłow 1964:136 as Ranunculus cassubicus subsp. "undefined"
cass	Ranunculus auricomus s.l	48	6	Poland	Maków Podhalański (scrub); 49°44'/19°41'	M/245–254	49.7333	19.6833	Jankun & Izmaiłow 1964:136 as Ranunculus cassubicus subsp. "undefined"
cass	Ranunculus auricomus s.l	48	6	Poland	Maków Podhalański (scrub); 49°44'/19°41'	M/272	49.7333	19.6833	Jankun & Izmaiłow 1964:136 as Ranunculus cassubicus subsp. "undefined"
cass	Ranunculus auricomus s.l	32	4	Poland	Krasiczyn near Przemyśl (Querceto-Carpinetum); 49°47'/22°/40'	Kras/188–194	49.7833	22.6667	Jankun & Izmaiłow 1964:136 as Ranunculus cassubicus subsp. "undefined"; Skalińska & al. 1964:48
cass	Ranunculus auricomus s.l	48	6	Poland	Niedzica scrub, c. 500 m a.s.l.; 49°25'/20°18'	N/307–314	49.4167	20.3	Jankun & Izmaiłow 1964:136 as Ranunculus cassubicus subsp. "undefined"; Skalińska & al. 1964:48
cass	Ranunculus auricomus s.l	44	6	Poland	Maków Podhalański (scrub); 49°44'/19°41'	M/56	49.7333	19.6833	Jankun & Izmaiłow 1964:136 as Ranunculus cassubicus subsp. "undefined"; Skalińska & al. 1964:48
cass	Ranunculus auricomus s.l	32	4	Poland	Kalina Wielka (Querceto-Carpinetum); 50°23'/20°9'		50.3833	20.15	Kalita in Jankun & Izmaiłow 1964:134 as Ranunculus cassubicus subsp. "undefined"
cass	Ranunculus auricomus s.l	44	6	Poland	Cisie near Miechów (Carpineto-Quercetum); 50°25'/20°6'		50.4167	20.1	Kalita in Jankun & Izmaiłow 1964:134 as Ranunculus cassubicus subsp. "undefined"
cass	Ranunculus auricomus s.l	32	4	Poland	Ojców (border of deciduous wood); 50°18'/19°50'		50.3	19.8333	Kalita in Jankun & Izmaiłow 1964:135 as Ranunculus cassubicus subsp. "undefined"
cass	Ranunculus auricomus s.l	32	4	Poland	Staniątki near Niepolomice (scrub); 50°1'/20°13'	St/344–351	50.0167	20.2167	Kalita in Jankun & Izmaiłow 1964:135 as Ranunculus cassubicus subsp. "undefined"
cass	Ranunculus auricomus s.l	44	6	Poland	Klonów (Querceto-Carpinetum); 50°20'/20°11'		50.3333	20.1833	Kalita in Jankun & Izmaiłow 1964:135 as Ranunculus cassubicus subsp. "undefined"
cass	Ranunculus auricomus s.l.	32	4	Poland	Tunel, deeper parts of the wood; 50°26'/19°59'	T/127	50.4333	19.9833	Jankun & Izmaiłow 1964:134 as Ranunculus cassubicus near to marginicolus
cass	Ranunculus auricomus s.l.	40	5	Poland	Antolka near Książ Wielki (Querceto-Carpinetum); 50°23'/20°8'	An/4–19	50.3833	20.1333	Jankun & Izmaiłow 1964:134 as Ranunculus cassubicus near to marginicolus
cass	Ranunculus auricomus s.l.	44	6	Poland	Widnica near Miechów (Querceto-Carpinetum); 50°25'/20°3'	Wd/84–86	50.4167	20.1	Jankun & Izmaiłow 1964:134 as Ranunculus cassubicus near to marginicolus
cass	Ranunculus auricomus s.l.	44	6	Poland	Antolka near Książ Wielki (Querceto-Carpinetum); 50°23'/20°8'	An/20–26	50.3833	20.1333	Jankun & Izmaiłow 1964:134 as Ranunculus cassubicus near to marginicolus
cass	Ranunculus braun-blanquetii Pignatti	32	4	Italy	Monte Baldo (Verona), tra Malga Valfredda-Crocetta e Bocchetta di Naole, lungo il sentiero al margine della faggeta, 1450 m s.m.		45.7247	10.8448	Marchi & Visonà 1982:257; Masci et al. 1994:102 as "trisomic- pentasomic like aneuploid"
cass	Ranunculus carpaticola Soó	16	2	Romania	South Carpathians, Mt. Bucegi, NW Busteni (forest)	BUCS	45.4353	25.4919	Hörandl 2002:68; Paun et al. 2006b:226
cass	Ranunculus carpaticola Soó	16	2	Romania	South Carpathians, Mt. Bucegi, Valea Cerbilor (forest)	BUCS	45.4244	25.5363	Paun et al. 2006b:226; Hörandl et al. 2009:1197
cass	Ranunculus carpaticola Soó	16	2	Slovakia	Slovenské rudohorie, Revúca NE, Skalka, forest, 340-360 m a. s. l., 7386b	REV1	48.6886	20.124	Hörandl & Greilhuber 2002:88 as R. revucensis Májovský n.n. as REV1; Hörandl 2002:68 as Ranunculus carpaticola s.l. REV1; Paun et al. 2006a:899; Paun et al. 2006b:226; Hörandl et al. 2009:1197	original published: Murín & Májovský in Májovský J. (1978) Index of chromosome numbers of Slovakian flora (Part 6). Acta Fac. Rer. Nat. Univ. Comen. Bot. 26:1-42. Leg.: Májovský & Murín as R. revucensis Májovský n.n
cass	Ranunculus carpaticola Soó	ca. 16	2	Slovakia	Slovenské rudohorie, Revúca, Pavlusove bane hill, forest, 310-340 m a. s. l., 7386b	REV2 / 8486	48.6738	20.1115	Hörandl 2002:68 as Ranunculus carpaticola s.l.; Paun et al. 2006a:899; Paun et al. 2006b:226; Marhold et al. 2007:490; Hörandl & Temsch 2009:84; Hörandl et al. 2009:1197
cass	Ranunculus carpaticola Soó	48	6	Slovakia	V. Tatry, Tatranská Lomnica, in a forest, c. 1350 m a.s.l., 6887b	LT/87–88	49.1667	20.3	Jankun & Izmaiłow 1964:136 as Ranunculus cassubicus subsp. "undefined"; Skalińska & al. 1964:48; Marhold et al. 2007:493, probably referable to R. carpaticola according to Hörandl 2006, in litt.
cass	Ranunculus carpaticola Soó	16	2	Slovakia	Slovenské rudohorie, Revúca NE, Skalka hill, 7386b		48.6886	20.124	Májovský & Murín 1987:39 as R. revucensis Májovský n.n.; Marhold et al. 2007:489	original published: Murín & Májovský in Májovský J. (1978) Index of chromosome numbers of Slovakian flora (Part 6). Acta Fac. Rer. Nat. Univ. Comen. Bot. 26:1-42. Leg.: Májovský & Murín as R. revucensis Májovský n.n
cass	Ranunculus carpaticola Soó	16	2	Slovakia	Slovenské rudohorie, Revúca - kúpele [spa], 7386b		48.6868	20.0913	Májovský & Murín 1987:39 as R. revucensis Májovský n.n; Marhold et al. 2007:489	original published: Murín & Májovský in Májovský J. (1978) Index of chromosome numbers of Slovakian flora (Part 6). Acta Fac. Rer. Nat. Univ. Comen. Bot. 26:1-42. Leg.: Májovský & Murín as R. revucensis Májovský n.n
cass	Ranunculus carpaticola Soó	32	4	Slovakia	Liptovská kotlina, Ivachnová, 6982a		49.0899	19.411	Májovský & Murín 1987:39; Marhold et al. 2007:492; Hörandl & Greilhuber 2002:88:Ivachnová, bottom of Mt. Bezan, 520 m as IVAC; ?? Hörandl 2002:68 as Ranunculus carpaticola s.l.	Murín & Májovský 1986, leg. Májovský & Murín
cass	Ranunculus carpaticola Soó	32	4	Slovakia	Bukovské vrchy, Ruský Potok, site "Kopanina", 69100c		49.0289	22.4056	Májovský & Murín et al. 1987:38 as R. carpaticola; Marhold et al. 2007:492	original published: Murín & Májovský in Májovský J. (1978) Index of chromosome numbers of Slovakian flora (Part 6). Acta Fac. Rer. Nat. Univ. Comen. Bot. 26:1-42. Leg.: Májovský & Murín
cass	Ranunculus carpaticola Soó	32	4	Slovakia	Spišské kotliny, Plaveč, bushes near the Poprad [river], 6791a		49.1316	21.5252	Májovský & Murín et al. 1987:39; Marhold et al. 2007:492, location specified	Uhríková & Májovský 1982, leg. Dostál; z dvoch rozdielnych populácii
cass	Ranunculus carpaticola Soó	32	4	Slovakia	Slanské vrchy, Slanec-hrad, 7394d		48.638	21.4711	Májovský, Murín et al. 1987:39; Marhold et al. 2007:492	Murín & Májovský 1986, leg. Májovský & Murín
cass	Ranunculus carpaticola Soó	48	6	Slovakia	Veľká Fatra, Ľubochňa, close to the village Dolina (meadow), 6880d (meadow)	LUB	49.1204	19.1635	Marhold et al. 2007:494; Paun et al. 2006:899; Paun et al. 2006b:226
cass	Ranunculus carpaticola Soó	16	2	Slovakia	Central Slovakia, Slovenské Rudohorie, Revúca	C5	48.6844	20.1319	Mládenkova 2005, Hörandl et al. 2009:1197
cass	Ranunculus carpaticola Soó	32	4	Slovakia	Šarišská vrchoviny, Medzany, Kanaš NE, in the oak forest, 6993a		49.0434	21.1415	Uhriková & Májovský in Löve 1978:378; Májovský & Murín 1987:39, shall be also in Uhríková & Májovský in Löve 1980, actually in Löve 1978, as Šarišské vrchy; Marhold et al. 2007:492, "Medzany" not given	leg. Dostál
cass	Ranunculus carpaticola x cassubicifolius	32	4	Slovakia	East Slovakia, Nízke Beskydy, Humenský Sokol, near to old water reservoir	C9	48.9066	21.9228	Mládenkova 2005, Hörandl et al. 2009:1198 as R. carpaticola × cassubicifolius (introgressants)
cass	Ranunculus carpaticola x cassubicifolius	48	6	Slovakia	Central Slovakia, Liptovská kotlina, Liptovský hrádok, close to the river Váh (riverine forest), 6984c	HRA / C44	49.035	19.7075	Mládenkova 2005; Paun et al. 2006a:899 as Ranunculus carpaticola; Paun et al. 2006b:226 as Ranunculus carpaticola; Marhold et al. 2007:493; Hörandl & Temsch 2009:84; Hörandl et al. 2009:1197
cass	Ranunculus carpaticola x cassubicifolius		4	Slovakia	Central Slovakia, Veľká Fatra, beginning of the valley Gaderská dolina	C13	48.9327	18.9361	Mládenkova 2005, Hörandl et al. 2009:1197
cass	Ranunculus carpaticola x cassubicifolius	40	5	Slovakia	Central Slovakia, Veľká Fatra, Gaderská dolina, near ruins of Gaderský hrad	C14	48.9471	18.9471	Mládenkova 2005, Hörandl et al. 2009:1197
cass	Ranunculus carpaticola x cassubicifolius	48	6	Slovakia	Central Slovakia, Turčianska kotlina, Martin-Záturčie, slope near the castle	C19	49.0882	18.9161	Mládenkova 2005, Hörandl et al. 2009:1197
cass	Ranunculus carpaticola x cassubicifolius	40	5	Slovakia	Central Slovakia, Veľká Fatra, near Čremošné, direction to the ski lift	C15	48.85	18.9205	Mládenkova 2005, Hörandl et al. 2009:1197
cass	Ranunculus carpaticola x cassubicifolius	48	6	Slovakia	Central Slovakia, Liptovská kotlina, Ivachnová, bottom of Mt. Bezan, meadows across the highway and adjacent Carpinus forest, 520 m a. s. l., 6982a	IVAC / C41	49.0899	19.411	Mládenkova, Paun & Hörandl 2003; Hörandl 2002:68 as R. carpaticola s.l.; Paun et al. 2006a:899 as Ranunculus carpaticola; Paun et al. 2006b:226 as Ranunculus carpaticola; Marhold et al. 2007:493; Hörandl et al. 2009:1197
cass	Ranunculus carpaticola x cassubicifolius	48	6	Slovakia	Central Slovakia, Liptovská kotlina, Ružomberok, right side of the road, direction from Zilina (shrub), 6981a	RUZ / C40	49.0964	19.2492	Mládenková, Paun & Hörandl 2003; Paun et al. 2006a:899 as Ranunculus carpaticola; Paun et al. 2006b:226 as Ranunculus carpaticola; Marhold et al. 2007:493; Hörandl & Temsch 2009:84; Hörandl et al. 2009:1197
cass	Ranunculus carpaticola x cassubicifolius	48	6	Slovakia	Central Slovakia, Strážovské vrchy (near Trenčin), between Kubra and Kubrica, close to the bus-stop Kyselka (margin of Carpinus forest and meadow); 7174b	TRE / C29	48.8861	18.0948	Mládenkova, Paun & Hörandl 2003; Paun et al. 2006a:899 as Ranunculus carpaticola; Paun et al. 2006b:226 as Ranunculus carpaticola; Marhold et al. 2007:494; Hörandl et al. 2009:1197
cass	Ranunculus carpaticola x cassubicifolius	48	6	Slovakia	Central Slovakia, Turčianska kotlina, Vrútky, Piarová [Piatrová], behind the cottage (forest), 6897d	VRU1 / C34	49.1217	18.8869	Mládenkova, Paun & Hörandl 2003; Paun et al. 2006a:899 as Ranunculus carpaticola; Paun et al. 2006b:226 as Ranunculus carpaticola; Marhold et al. 2007:494; Hörandl et al. 2009:1197
cass	Ranunculus carpaticola x cassubicifolius	48	6	Slovakia	Central Slovakia, Turčianska kotlina, Vrútky, Piarová [Piatrová], behind the cottage (meadow), 6879d	VRU2 / C35	49.1217	18.8869	Mládenkova, Paun & Hörandl 2003; Paun et al. 2006a:899 as Ranunculus carpaticola; Paun et al. 2006b:226 as Ranunculus carpaticola; Marhold et al. 2007:494; Hörandl et al. 2009:1197
cass	Ranunculus carpaticola x cassubicifolius	48	6	Slovakia	Central Slovakia, Turčianska kotlina, near Martin, Turčianska Štiavnička, Révayovský park (forest), 6980a	TUR / C36	49.0805	19.0218	Mládenkova, Paun & Hörandl 2003; Paun et al. 2006a:899 as Ranunculus carpaticola; Paun et al. 2006b:266 as Ranunculus carpaticola; Marhold et al. 2007:493; Hörandl et al. 2009:1197
cass	Ranunculus cassubicifolius W.Koch	16	2	Austria	Oberösterreich. Innviertel, ca. 0,5 km NW von Palting (ca. 10 km SSW von Mattighofen): Grabenrand, Schwarzerlenbruch, 500 m s. m [7944/4]		48.0154	13.1322	Dobeš in Dobeš & Vitek 2000:49
cass	Ranunculus cassubicifolius W.Koch	16	2	Austria	Salzburg. Flachgau, zwischen Grabensee and Mattsee, ca. 0,6 km NW vom Moorbad: Schwarzerlenbruch, 510 m s. m [8044/2]	SALZ	47.9836	13.0938	Dobeš in Dobeš & Vitek 2000:49; Hörandl & Greilhuber 2002:88 as SALZ; Hörandl 2002:68 as SALZ; Paun et al. 2006b:226; Hörandl et al. 2009:1197
cass	Ranunculus cassubicifolius W.Koch	16	2	Austria	Burgenland/Hungary (directly on the border), Hammer (forest)	HAMM	47.4086	16.4433	Hörandl & Greilhuber 2002:88; Paun et al. 2006b:226; Hörandl & Temsch 2009:84; Hörandl et al. 2009:1197
cass	Ranunculus cassubicifolius W.Koch	32	4	Austria	Niederösterreich, Ybbstaler Alpen, Wülfachgraben, unteres Ende, 5,2 km SE Ybbsitz, Gasthof Yagawirt: Schluchtwald, Bachrand, 500 m s. m., 8055/4	GH-20 / YBB1	47.9143	14.9636	Hörand et al. 1997:198 as ca. 32; Hörandl & Gutermann 1998:555; Dobeš & Vitek 2000:49 as c. 32; Hörandl & Greilhuber 2002:88; Hörandl 2002:68; Paun et al. 2006vb:226; Hörandl et al. 2009:1197
cass	Ranunculus cassubicifolius W.Koch	32	4	Austria	Niederösterreich, Ybbstaler Alpen, Saaggraben 2 km SSW Göstling an der Ybbs: Schluchtwald, Bachrand, 560 m s. m., 8255/1	GH-19	47.7972	14.9156	Hörand et al. 1997:198; Hörandl & Gutermann 1998:555; Dobeš & Vitek 2000:49
cass	Ranunculus cassubicifolius W.Koch	32	4	Austria	Niederösterreich, Ybbstaler Alpen, Schwarzois, an der Ois zwischen Rothmauer und Meierhofeben: Schluchtwald, Bachrand, 600 m s. m., 8155/2	HN7.6.87 / YBB2	47.8799	14.9332	Hörand et al. 1997:198; Hörandl & Gutermann 1998:555; Dobeš & Vitek 2000:49; Hörandl & Greilhuber 2002:88; Hörandl 2002:68; Paun et al. 2006b:226; Hörandl et al. 2009:1197
cass	Ranunculus cassubicifolius W.Koch	16	2	Switzerland	Willadingen, Bern	Cfol 4,5	47.1387	7.62003	Häflinger 1943:323, 325; Rutishauser 1954:8
cass	Ranunculus cassubicifolius W.Koch	16	2	Switzerland	Horbachwald, Sursee	Cfol 2,3	47.1762	8.0526	Rutishauser 1954:8
cass	Ranunculus cassubicifolius W.Koch	16	2	Switzerland	Äsch, Luzern	Cfol 11-14	47.4656	7.60515	Rutishauser 1954:8; Nogler 1984:413
cass	Ranunculus cassubicifolius W.Koch	16	2	Switzerland	Canton Jura, Tourbière des Embreux; 1000 m		47.2419	7.09542	Vuillemin 1990:209
cass	Ranunculus cassubicifolius W.Koch	16	2	Switzerland	Canton Jura, Courchapois; 540 m		47.3488	7.45584	Vuillemin 1990:209
cass	Ranunculus cassubicifolius W.Koch	16	2	Switzerland	Canton Jura, Monsevelier; 800 m		47.3625	7.50835	Vuillemin 1990:209
cass	Ranunculus cassubicifolius W.Koch	16	2	Switzerland	Canton Lucerne, Aesch; 500 m		47.468	7.5939	Vuillemin 1990:209	same plants as in Rutishauser 1954: 9?
cass	Ranunculus cassubicifolius W.Koch	16	2	Switzerland	Canton Berne, Willadingen; 460 m		47.1451	7.61657	Vuillemin 1990:209
cass	Ranunculus cassubicifolius W.Koch	16	2	Switzerland	Canton Soleure, Binzberg; 1000 m		47.2644	7.47575	Vuillemin 1990:209:
cass	Ranunculus cassubicifolius W.Koch	16	2	Switzerland	Canton Luzern, Mauensee; 504 m		47.1673	8.0786	Vuillemin 1990:209; Vuillemin 1992:86
cass	Ranunculus cassubicifolius W.Koch	16	2	Germany	Bavaria, N. Foreland of Alps, Dobelbachgraben W Waginger See, 500 m (forest)	BAV1	47.9194	12.7427	Hörandl & Greilhuber 2002:88; Hörandl 2002:68; Paun et al. 2006b:226; Hörandl et al. 2009:1197
cass	Ranunculus cassubicifolius W.Koch	16	2	Germany	Oberbayern, N Foreland of Alps, Osterbuchberg, N-Fuß, SW Grabenstätt 8141.3, 530 m (forest)	BAV2 / Hö6685	47.814	12.51	Hörand et al. 1997:198; Hörandl & Greilhuber 2002:88 als BAV2; Hörandl 2002:68 als BAV2, Paun et al. 2006b:226 as BAV2; Hörandl et al. 2009:1197
cass	Ranunculus cassubicus L.	32	4	Belarus	1 km k juru ot der. Krajtsy, kv. 499, el'nik kislichnyj		54.6592	28.274	Parfenov & Dmitrieva 1987:66
cass	Ranunculus cassubicus L.	32	4	Belarus	Brestskaja obl., Pruzhankij r-n, okr. D. Popelevo	49	52.7509	24.093	Semerenko 1985:993; Takhtajan 1993
cass	Ranunculus cassubicus L.	32	4	Hungary	Cott. Szabolcs, in marginibus silvae, in ass. Ulmeto-Fraxinetum-Roboretum, prope praedium Bátorliget		47.7584	22.2716	Pólya 1950:50	determination confirmed by Soó 1964: 235
cass	Ranunculus cassubicus L.	32	4	Lithuania	Kowno (Kaunas)		54.8925	23.9021	Häflinger 1943:323, 325; Rutishauser:1954:8	Rutishauser 1954: 8: own observation as Cass
cass	Ranunculus cassubicus L.	32	4	Sweden	spontan Bergianischer Garten		59.3692	18.0464	Langlet 1932:393
cass	Ranunculus digitatifolius Jasiewicz	32	4	Poland	Tunel, deeper parts of the wood; 50°26'/19°59'	T/111–123	50.4376	19.9954	Jankun & Izmaiłow 1964:134 as Ranunculus cassubicus subsp. digitatifolius; Skalińska & al. 1964:48
cass	Ranunculus dispar (Markl.) Ericsson	40	5	Finland	V, Halikko, Vuorentaka		60.3712	23.0497	Rousi 1956:8 as R. cassubicus ssp. dispar
cass	Ranunculus elatior (Fr.) Ericsson	32	4	Finland	Åland, Finström		60.2291	19.9813	Rousi 1956:8 as R. cassubicus ssp. elatior
cass	Ranunculus hannae Jasiewicz	40	5	Poland	Tunel, deeper parts of the wood; 50°26'/19°59'	T/124–126 & T128–140	50.4376	19.9954	Jankun & Izmaiłow 1964:134 as Ranunculus cassubicus subsp. Hannae; Skalińska & al. 1964:48
cass	Ranunculus hungaricus Soó	32	4	Hungary	Matricum, Miskolc, Mt. Bükk, Gyertyán-völgy, 200 m SW Adriantelen (Locus typicus)	20735	48.1449	20.6253	Hörandl et al. 2009:1198
cass	Ranunculus hungaricus Soó		4	Slovakia	Central Slovakia, Turčianska kotlina, near Martin, Turčianska Štiavnička, Révayovský park	C37	49.0805	19.0218	Mládenkova 2005, Hörandl et al. 2009:1198 as R. ×hungaricus
cass	Ranunculus hungaricus Soó	30-32	4	Slovakia	Central Slovakia, Veľká Fatra, Frčkov, slope called Folkusovský ušust	C18	48.8903	19.0897	Mládenkova 2005, Hörandl et al. 2009:1198 as R. ×hungaricus
cass	Ranunculus hungaricus Soó	32	4	Slovakia	East Slovakia, Nízke Beskydy, near the brook Hubková close to Humenné	C11	48.9535	21.9305	Mládenkova 2005, Hörandl et al. 2009:1198 as R. ×hungaricus
cass	Ranunculus hungaricus Soó	32	4	Slovakia	East Slovakia, Nízke Beskydy, near NPR Humenská, by sanatorium Podskalka	C10	48.9049	21.945	Mládenkova 2005, Hörandl et al. 2009:1198 as R. ×hungaricus
cass	Ranunculus hungaricus Soó		5	Slovakia	Central Slovakia, Turčianska kotlina, near Martin, Turčianska Štiavnička, Révayovský park	C37	49.0805	19.0218	Mládenkova 2005, Hörandl et al. 2009:1198 as R. ×hungaricus
cass	Ranunculus hungaricus Soó	32	4	Slovakia	East Slovakia, Nízke Beskydy, Humenský Sokol, near the hill Veľká skala	C8	48.9066	21.9228	Mládenkova 2005, Hörandl et al. 2009:1198 as R. ×hungaricus
cass	Ranunculus hungaricus Soó	32	4	Slovakia	Central Slovakia, Liptovska kotlina, Ivachnová (meadow)	C42	49.0938	19.4126	Mládenkova, Paun & Hörandl 2003; Hörandl & Temsch 2009:84 as Ranunculus ×hungaricus; Hörandl et al. 2009:1198 as R. ×hungaricus
cass	Ranunculus imitans (Markl.) Ericsson	32	4	Finland	U, Espoo, Gröndal - Dalsvik		60.2269	24.7481	Rousi 1956:8 as R. cassubicus ssp. imitans
cass	Ranunculus inopinus (Markl.) Ericsson	32	4	Finland	U, Porvoo, Kaarenkylä		60.4676	25.5427	Rousi 1956:8 as R. cassubicus ssp. inopinus
cass	Ranunculus macrantherus (Markl.) Ericsson	32	4	Finland	U, Helsinki parish		60.2833	25.1397	Rousi 1956:8 as R. cassubicus ssp. macrantherus
cass	Ranunculus marginicola Jasiewicz	32	4	Poland	Antolka near Książ Wielki (Querceto-Carpinetum); 50°23'/20°8'	An/1–3	50.3833	20.1333	Jankun & Izmaiłow 1964:134 as Ranunculus cassubicus subsp. marginicolus
cass	Ranunculus marginicola Jasiewicz	24	3	Poland	Antolka near Książ Wielki (Querceto-Carpinetum); 50°23'/20°8'		50.3833	20.1333	Kalita in Jankun & Izmaiłow 1964:134 as Ranunculus cassubicus subsp. marginicolus
cass	Ranunculus marginicola Jasiewicz	32	4	Poland	Widnica near Miechów (Querceto-Carpinetum); 50°25'/20°3'		50.4167	20.05	Kalita in Jankun & Izmaiłow 1964:134 as Ranunculus cassubicus subsp. marginicolus
cass	Ranunculus marginicola Jasiewicz	32	4	Poland	Cisie near Miechów (Carpineto-Quercetum); 50°25'/20°6'		50.4167	20.1	Kalita in Jankun & Izmaiłow 1964:134 as Ranunculus cassubicus subsp. marginicolus
cass	Ranunculus marginicola Jasiewicz	32	4	Poland	Antolka near Książ Wielki (Querceto-Carpinetum); 50°23'/20°8'		50.3833	20.1333	Kalita in Jankun & Izmaiłow 1964:134 as Ranunculus cassubicus subsp. marginicolus
cass	Ranunculus marginicola Jasiewicz	64	8	Poland	Antolka near Książ Wielki (Querceto-Carpinetum); 50°23'/20°8'		50.3833	20.1333	Kalita in Jankun & Izmaiłow 1964:134 as Ranunculus cassubicus subsp. marginicolus
cass	Ranunculus marginicola Jasiewicz	44	6	Poland	Widnica near Miechów (Querceto-Carpinetum); 50°25'/20°3'		50.4167	20.05	Kalita in Jankun & Izmaiłow 1964:134 as Ranunculus cassubicus subsp. marginicolus
cass	Ranunculus marginicola Jasiewicz	44	6	Poland	Antolka near Książ Wielki (Querceto-Carpinetum); 50°23'/20°8'		50.3833	20.1333	Kalita in Jankun & Izmaiłow 1964:134 as Ranunculus cassubicus subsp. marginicolus
cass	Ranunculus marginicolus Jasiewicz	32	4	Poland	Tunel (Querceto-Carpinetum) border of the wood; 50°26'/19°59'	T/62, T73–75	50.4376	19.9954	Jankun & Izmaiłow 1964:134 as Ranunculus cassubicus subsp. marginicolus
cass	Ranunculus marginicolus Jasiewicz	32	4	Poland	Tunel (Querceto-Carpinetum) border of the wood; 50°26'/19°59'		50.4376	19.9954	Kalita in Jankun & Izmaiłow 1964:134 as Ranunculus cassubicus subsp. marginicolus
cass	Ranunculus minor Májovský inv.	32	4	Slovakia	Stráż. vrvhy, Lietava, Drieňovica hill, edge of forest, 6878a		49.1679	18.681	Marhold et al. 2007:491 from Hallonová 1992:322
cass	Ranunculus moeszii Soó	32	4	Slovakia	Špišské kotliny, Vydrnik, 6988c or 7088a		49.0028	20.4019	Uhríková & Májovský in Löve 1980:725; Májovský & Murin 1987:39 as R. moessii Soó; Marhold et al. 2007:491	leg. Májovský et Dostál
cass	Ranunculus niepolomicensis Jasiewicz	40	5	Poland	Szarów (Cariceto elongatae-Alnetum glutinosae); 50°1'/20°17'	Sz/161–168	50.0167	20.2833	Kalita in Jankun & Izmaiłow 1964:135 as Ranunculus cassubicus subsp. niepolomicensis; Skalińska & al. 1964:48
cass	Ranunculus niepolomicensis Jasiewicz	40	5	Slovakia	Západné Beskydy, Oravská Lesná, 6681a		49.3711	19.1786	Májovský, Murín et al. 1987:38; Marhold et al. 2007:493	Murín & Májovský 1986, leg. Májovský & Murín
cass	Ranunculus niepolomicensis Jasiewicz	40	5	Slovakia	Spišské kotliny, Svit, 6987a		49.0596	20.2092	Májovský, Murín et al. 1987:38; Marhold et al. 2007:493	Murín & Májovský 1986, leg. Májovský & Murín, z 3 populaácií
cass	Ranunculus niepolomicensis Jasiewicz	40	5	Slovakia	Spišské kotliny, Veľká Lomnica, 6888c		49.1115	20.3604	Májovský, Murín et al. 1987:38; Marhold et al. 2007:493	Murín & Májovský 1986, leg. Májovský & Murín, z 3 populaácií
cass	Ranunculus niepolomicensis Jasiewicz	40	5	Slovakia	Spišské kotliny, Chmelnica [Chmeľnica], 6690c		49.2959	20.7316	Májovský, Murín et al. 1987:38; Marhold et al. 2007:493	Murín & Májovský 1986, leg. Májovský & Murín, z 3 populaácií
cass	Ranunculus niepolomicensis Jasiewicz	40	5	Slovakia	Kriv. M. Fatra, Párnica, NW, Mt. Nová Magura, 6780d		49.2151	19.1833	Marhold et al. 2007:492 from Murín in Murín & Majovský 1992:55
cass	Ranunculus pawlowskii Jasiewicz	32	4	Poland	Chorowice-Mogilany; 49°57'/19°53'		49.95	19.8833	Kalita in Jankun & Izmaiłow 1964:135 as Ranunculus cassubicus subsp. pawłowskii
cass	Ranunculus pawlowskii Jasiewicz	32	4	Poland	Wieliczka; 49°/59'/20°4'		49.9833	20.0667	Kalita in Jankun & Izmaiłow 1964:135 as Ranunculus cassubicus subsp. pawłowskii
cass	Ranunculus prorsidens (Markl.) Ericsson	32	4	Finland	EH, Lammi, Iso-Pappila		61.0728	25.0109	Rousi 1956:8 as R. cassubicus ssp. prosidens
cass	Ranunculus pseudocassubicus (Christ) Christ ex W.Koch	32	4	Switzerland	[Kanton Basel-Landschaft] Brüglingen	Pcass 1-4	47.5338	7.62232	Häflinger 1943:323, 325; Rutishauser 1954:9
cass	Ranunculus schwarzii Jasiewicz	32	4	Poland	Klonów (Querceto-Carpinetum); 50°20'/20°11'	Kl/256–271	50.3333	20.1833	Jankun & Izmaiłow 1964:135 as Ranunculus cassubicus subsp. schwarzii
cass	Ranunculus szaferi Jasiewicz	32	4	Poland	Klonów (Querceto-Carpinetum); 50°20'/20°11'	Kl/156–160	50.3333	20.1833	Jankun & Izmaiłow 1964:135 as Ranunculus cassubicus subsp. szaferi; Skalińska & al. 1964:48
cass	Ranunculus cassubicus L.	32	4	Belarus	Minskaya Obl., Uzdenskij R-n, 3 km k Juz ot poc. Energetik, Negorel'ckoje lesnichestvo, Kb. 80	91	53.593	27.0541	Dmitrieva 2002:132	leg. Koslovskaja, Blazhevych
cass	Ranunculus cassubicus L.	32	4	Belarus	Mogilevskaya Obl., Osipovitzski R-n, Vritzaloviviskoje lesnichestvo, Kv. 4, dyvrava snitevaja	2130, 2133	53.3732	28.8294	Dmitrieva 2002:132	leg. Dimitrieva, Tret'jakov
cass	Ranunculus cassubicus L.	32, 32 +1B	4	Belarus	Mogilveskaya Obl., Osipovitzski R-n: 1 km k Z ot D. Ustsizh, zlakovo-raznotravnyj lug	2120	53.3937	28.8702	Dmitrieva 2002:132	leg. Dimitrieva, Tret'jakov
cass	Ranunculus cassubicus L.	32, 32 +1B	4	Belarus	Mogilveskaya Obl., Osipovitzski R-n: 1 km k Z ot D. Ustsizh, Brizalovitschskoe lesnitchestvo: Kv. 1, lipijak snitevij	2123	53.3937	28.8702	Dmitrieva 2002:132	leg. Dimitrieva, Tret'jakov
cass	Ranunculus cassubicus L.	32, 32 +1B	4	Belarus	Mogilveskaya Obl., Osipovitzski R-n: 1 km k Z ot D. Ustsizh, Britsalovitschskoe lesnitchestvo: Kv. 4, dubrava snitevaja	2126	53.3937	28.8702	Dmitrieva 2002:132	leg. Dimitrieva, Tret'jakov
fal	Ranunculus abstrusus O.Schwarz, Ranunculus biformis W.Koch, Ranunculus puberulus W.Koch	32	4	Germany	Barterode (Niedersachsen, Landkreis Göttingen) / 4424; 3552850/5711650 / Straßenrand und Böschung auf der rechten Seite zwischen Dransfeld und Barterode, offener Standort am Rand eines Mischwaldes. 240 m	Fundort 12	51.5369	9.76066	Lohwasser 2001:38, 67, 118
fal	Ranunculus abstrusus O.Schwarz, Ranunculus opimus O.Schwarz, Ranunculus transiens (Vollm.) Borch.-Kolb, 3 Expl. unbestimmbar	32	4	Germany	Baumgarten (Brandenburg, Landkreis Uckermark) / Im Ort an der Hauptstraße in Richtung Brüssow auf der rechten Seite an der Böschung, halbschattiger Standort. 35 m	Fundort 105	53.3469	13.9501	Lohwasser 2001:41, 67, 177
fal	Ranunculus abstrusus O.Schwarz, Ranunculus puberulus W.Koch, Ranunculus vertumnalis O.Schwarz, 7 Expl. unbestimmbar	32	4	Germany	Prenzlau (Brandenburg, Landkreis Uckermark) / An der Uckerpromenade kurz vor dem Bootshaus Prenzlau links am Hang, offener Standort. 20 m	Fundort 103	53.3013	13.8642	Lohwasser 2001:41, 67, 175
fal	Ranunculus attingens (Markl.) Ericsson	32	4	Finland	U, Espoo		60.2026	24.6464	Rousi 1956:8 as R. fallax ssp. attingens
fal	Ranunculus biformis W.Koch, Ranunculus monacensis Borch.-Kolb, Ranunculus puberulus W.Koch	32	4	Germany	Kassel - Wilhelmshöhe (Hessen, Kreis Kassel-Stadt) / 4622; 3529550/5686800 / Park, gleich hinter der Endstation der Linie 1; Wiese und unter zwei großen Buchen, offener, z.T. leicht schattiger Standort; Standort wird gemäht. 230 m	Fundort 3	51.3152	9.4228	Lohwasser 2001:38, 67, 112
fal	Ranunculus biformis W.Koch, Ranunculus pseudopimus O.Schwarz , Ranunculus puberulus W.Koch	32	4	Germany	Kassel, Aue I (Hessen, Kreis Kassel-Stadt) / 4622; 3533959/5685350 / Park, Nähe Insel Siebenbergen; auf der Wiese und unter einzelnen Bäumen (Birken und Lärchen), offener, z. T. halbschattiger Standort; Standort wird gemäht. 160 m.	Fundort 1	51.3019	9.4859	Lohwasser 2001:38, 67, 111
fal	Ranunculus biformis W.Koch, Ranunculus pseudovertumnalis Haas, Ranunculus puberulus W.Koch, Ranunculus transiens (Vollm.) Borch.-Kolb	32	4	Germany	Adelebsen (Niedersachsen, Landkreis Göttingen) / 4424; 3553250/5717750; Feuchte Wiese mit einzelnen Weiden vor dem Erlenbruchwald (Siehe Fundort-Nr.: 14), offener Standort. 185 m	Fundort 15	51.5916	9.76735	Lohwasser 2001:38, 67, 119
fal	Ranunculus biformis W.Koch, Ranunculus puberulus W.Koch	32	4	Germany	Göttingen-Nikolausberg (Niedersachsen, Landkreis Göttingen) / 4425; 3568150/5715700 / Im Ortsteil Nikolausberg weiterfahren bis zum Ortsende beim Sendemast; Fundstellen im Wald, am Waldrand und am Ackerrand, schattiger, halbschattiger und offener Standort. 360 m	Fundort 18	51.5716	9.98193	Lohwasser 2001:38, 67, 121
fal	Ranunculus biformis W.Koch, Ranunculus puberulus W.Koch	32	4	Germany	Schildau bei Seesen I (Niedersachsen, Landkreis Goslar) / 4027; 3581650/5753850 / Kurz vor dem Gasthaus Winkelsmühle rechts und links am Straßenrand und im Auwald (Erle- Pappel), offener und schattiger Standort. 170 m	Fundort 32	51.9126	10.1855	Lohwasser 2001:39, 67, 130
fal	Ranunculus biformis W.Koch, Ranunculus puberulus W.Koch	32	4	Germany	Harlyberg bei Vienenburg (Niedersachsen, Landkreis Goslar) / 4029; 3604950/5759800 / Im Wald des Harlyberges in der Nähe von Woltingerode, schattiger Standort. 170 m	Fundort 37	51.9622	10.5259	Lohwasser 2001:39, 67, 133
fal	Ranunculus biformis W.Koch, Ranunculus puberulus W.Koch, 6 Expl. unbestimmbar	32	4	Germany	Strasburg (Mecklenburg-Vorpommern, Landkreis Uecker-Randow) / In Strasburg im Park am See unter Bäumen (Hainbuche, Ahorn), schattiger Standort. 60 m	Fundort 118	53.5022	13.7499	Lohwasser 2001:41, 67, 185
fal	Ranunculus biformis W.Koch, Ranunculus puberulus W.Koch, Ranunculus stricticaulis	32	4	Germany	Parkplatz Märchenmühle bei Kassel unter der Eisenbahnbrücke (Hessen, Landkreis Kassel) / 4623; 3538380/5691550 / Am Rand des Parkplatzes zur Straße hin unter Hainbuchen und Birken, auch im Straßengraben, schattiger, halbschattiger und offener Standort; Straßengraben wird gemäht. 130 m	Fundort 4	51.3574	9.54995	Lohwasser 2001:38, 67, 113
fal	Ranunculus biformis W.Koch, Ranunculus puberulus W.Koch, Ranunculus stricticaulis W.Koch	32	4	Germany	Hann. Münden (Niedersachsen, Landkreis Göttingen) / 4523; 3545580/5698700 / Im Wald am Anfang des Schedener Weges, schattiger Standort. 165m	Fundort 7	51.4211	9.65423	Lohwasser 2001:38, 67, 115
fal	Ranunculus chalarocarpus W.Koch ined.	32	4	Switzerland	Veltheim	Chal 1-2	47.4364	8.1474	Rutishauser 1954:8
fal	Ranunculus crebridens (Markl.) Ericsson	32	4	Finland	U, Helsinki parish, Hämeenkylä		60.2713	24.7918	Rousi 1956:8 as R. fallax ssp. crebidens
fal	Ranunculus czacinensis Májovský ined.	24	3	Slovakia	Tríbeč, Oponice, 7574d		48.4562	18.1604	Váchová & Májovský in Májovský et al. 1978; Marhold et al. 2007:490	original published: Váchová & Májovský in Májovský J. (1978) Index of chromosome numbers of Slovakian flora (Part 6). Acta Fac. Rer. Nat. Univ. Comen. Bot. 26:1-42. Leg.: Kováčiková.
fal	Ranunculus distentus W.Koch ined.	32	4	Germany	[Baden-Württemberg] Kl. Laufenburg	Dist 1-3	47.565	8.06237	Rutishauser 1954:8
fal	Ranunculus estherae Soó	32	4	Slovakia	Tríbeč, Jelenec, Gaštanica forest, 7675a		48.412	18.2194	Májovský, Murín et al. 1987:35; Marhold et al. 2007:491	original published: Váchová & Májovský in Májovský J. (1978) Index of chromosome numbers of Slovakian flora (Part 6). Acta Fac. Rer. Nat. Univ. Comen. Bot. 26:1-42. Leg.: Májovský
fal	Ranunculus euanthemus (Markl.) Ericsson	32	4	Finland	U, Espoo, Gröndal - Dalsvik		60.2269	24.7481	Rousi 1956:8 as R. fallax ssp. euanthemus
fal	Ranunculus evittae Májovský ined.	32	4	Slovakia	Str. Pohornádie, Košická NE, site "Chvalabohu" [currently "Zelený dvor" - a saddle, or a hill respectively, with the elevation point 348.6 E of the settlement of Moňok], 7293b		48.7833	21.3	Májovský, Murín et al. 1987:36; Marhold et al. 2007:492	Murín & Májovský 1986, leg. Májovský & Murín
fal	Ranunculus evittae Májovský ined.	32	4	Slovakia	Slanské vrchy, Herľany, 7194d		48.7969	21.4778	Májovský, Murín et al. 1987:36; Marhold et al. 2007:492	Murín & Májovský 1986, leg. Májovský & Murín
fal	Ranunculus evittae Májovský ined.	32	4	Slovakia	Nízke Beskydy, Humenné, Hubková dolina valley, 7097c		48.9535	21.9305	Májovský, Murín et al. 1987:36; Marhold et al. 2007:492	Uhríková & Májovský 1986, leg. Töröková
fal	Ranunculus fatrae Májovský ined.	32	4	Slovakia	Veľká Fatra, Gaderská dolina valley, 7079d		48.9535	18.9775	Májovský, Murín et al. 1987:38; Marhold et al. 2007:492	Murín & Májovský 1986, leg. Májovský & Murín
fal	Ranunculus fatrae Májovský ined.	32	4	Slovakia	Veľká Fatra, Turecká, Mt. Fačkov [Frčkov], 7180a		48.8922	19.0794	Májovský, Murín et al. 1987:38; Marhold et al. 2007:492	Murín & Májovský 1986, leg. Bernátová
fal	Ranunculus gregalis (Markl.) Ericsson	32	4	Finland	EH, Sääksmäki		61.2017	24.0735	Rousi 1956:8 as R. fallax ssp. gregalis
fal	Ranunculus grossidens W.Koch ex Brodtb.	32	4	Switzerland	[Kanton Bern] La Heutte	Gross 1	47.1903	7.2267	Rutishauser 1954:8
fal	Ranunculus hicanostylus (Markl.) Ericsson	32	4	Finland	EH, Kärkölä		60.8685	25.277	Rousi 1956:8 as R. fallax ssp. inaequalidens
fal	Ranunculus inaequalidens (Markl.) Ericsson	32	4	Finland	U, Tuusula, Purola		60.5101	25.0292	Rousi 1956:8 as R. fallax ssp. inaequalidens
fal	Ranunculus irregularis Dunkel	32	4	Germany	Hesse, Mainhausen		50.0145	8.99986	unpublished count T. Gregor 2007	as "Bayern, Unterfranken"
fal	Ranunculus kalinensis Jasiewicz	32	4	Poland	Kalina Wielka (Querceto-Carpinetum); 50°23'/20°9'	K/173–181	50.3833	20.15	Jankun & Izmaiłow 1964:134 as Ranunculus cassubicus subsp. kalinensis; Skalińska & al. 1964:48
fal	Ranunculus kitaibelii Soó	24	3	Slovakia	Tríbeč, Nitra, Zobor hill, 7674d		48.3464	18.1089	Májovský, Murín et al. 1987:34; Marhold et al. 2007:490	original published: Feráková et Májovský in Májovský J. (1978) Index of chromosome numbers of Slovakian flora (Part 6). Acta Fac. Rer. Nat. Univ. Comen. Bot. 26:1-42. Leg.: Feráková
fal	Ranunculus laetifrons (Markl.) Ericsson	32	4	Finland	U, Helsinki parish		60.2833	25.1397	Rousi 1956:8 as R. fallax ssp. laetifrons
fal	Ranunculus latisectus W.Koch	32	4	Switzerland	Eichwald bei Triengen, Solothurn		47.234	8.06606	Häflinger 1943:323, 325
fal	Ranunculus liptoviensis Májovský ined.	48	6	Slovakia	Veľká Fatra, Liptovská Osada, Jazierce [Rużomberok, twon part of Jazierce], 6981d		49.0196	19.2843	Májovský, Murín et al. 1987:38; Marhold et al. 2007:493 as published as Ranuculus rocttii-bodicensis	original published: Murín & Májovský in Májovský J. (1978) Index of chromosome numbers of Slovakian flora (Part 6). Acta Fac. Rer. Nat. Univ. Comen. Bot. 26:1-42. Leg.: Májovský & Murín
fal	Ranunculus megacarpus W.Koch	32	4	Switzerland	[Kanton Zürich] Rümlang	Meg 1	47.4477	8.521	Häflinger 1943:323, 325; Rutishauer 1954:9; Nogler 1984:413
fal	Ranunculus mendax (Markl.) Ericsson	32	4	Finland	U, Helsinki, Botanic Garden, University		60.175	24.9463	Rousi 1956:8 as R. fallax ssp. mendax
fal	Ranunculus mendosus Hörandl & Gutermann	32	4	Austria	Niederösterreich, Weinviertel, Zwischen Falkenstein und Poysdorf, Graben 0,7 km SSW Kote 327, 0,7 km E Kote 269: Eichenwald, Robinienforst, 270-280 m s. m., 7365/2	Hö6594	48.7241	16.6053	Hörand et al. 1997:198 as 32 ±1; Hörandl & Gutermann 1998:584; Dobeš & Vitek 2000:50
fal	Ranunculus microdon (Markl.) Ericsson	32	4	Finland	EH, Lammi, Iso-Pappila		61.0728	25.0109	Rousi 1956:8 as R. fallax ssp. microdon
fal	Ranunculus monacensis Borch.-Kolb, Ranunculus opimus O.Schwarz, Ranunculus pseudovertumnalis Haas, Ranunculus vertumnalis O.Schwarz	32	4	Germany	Scheden (Niedersachsen, Landkreis Göttingen) / 4524; 3549950/5703550 / Von Scheden in Richtung Bühren, nach der Abzweigung nach 300-500 m auf der linken Seite unter Alleebäumen und an der Böschung, halbschattiger und offener Standort; Standort wird teilweise gemäht. 200 m.	Fundort 8	51.4643	9.71773	Lohwasser 2001:38, 67, 115
fal	Ranunculus monacensis Borch.-Kolb, Ranunculus puberulus W.Koch, Ranunculus vertumnalis O.Schwarz	32	4	Germany	Herzberg (Niedersachsen, Landkreis Osterode am Harz) / 4327; 3592100/5723650 / Laubmischwald direkt bei dem Welfenschloss von Herzberg, schattiger Standort. 260 m	Fundort 22	51.6397	10.3294	Lohwasser 2001:38, 67, 124
fal	Ranunculus nemoricola (Markl.) Ericsson	32	4	Finland	U, Helsinki, Haaga		60.223	24.8951	Rousi 1956:8 as R. fallax ssp. nemoricola
fal	Ranunculus nemorosifolius Hörandl & Gutermann	32	4	Austria	Steiermark, Murtal, Graz, Botanischer Garten der Universität Graz, Holteigasse 6, 370 m s. m., 8958/2,	GuGraz II	47.0826	15.4573	Hörand et al. 1997:198; Dobeš & Vitek 2000:50
fal	Ranunculus novosedlicensis Májovský ined.	32	4	Slovakia	Bukovské vrchy, Nová Sedlica, Mt. Bahná, 69100b		49.0547	22.4923	Májovský, Murín et al. 1987:37-38; Marhold et al. 2007:490	original published: Murín & Májovský in Májovský J. (1978) Index of chromosome numbers of Slovakian flora (Part 6). Acta Fac. Rer. Nat. Univ. Comen. Bot. 26:1-42. Leg.: Májovský & Murín
fal	Ranunculus oravitzarum Májovský ined.	32	4	Slovakia	Slovenské rudohorie, Revúca N, 7386d		48.6844	20.1319	Májovský, Murín et al. 1987:37; Marhold et al. 2007:492	Murín & Májovský 1986, leg. Májovský & Murín
fal	Ranunculus pilisiensis Soó	32	4	Austria	Niederösterreich, Weinviertel, Bisamberg, Wegkreuzung, 0,75 km WNW Zigeunerbründl: Hainbuchwald, 330 m s. m., 7664/3	Ad9.5.92	48.3209	16.3778	Hörand et al. 1997:198 as ca. 32; Hörandl & Gutermann 1998:580; Dobeš & Vitek 2000:51
fal	Ranunculus pilisiensis Soó	32	4	Austria	Niederösterreich, Weinviertel, Matzner Wald, 2,5 km NNE Matzen: Laubwald, 200 m s. m., 7566/3	Gö984	48.4255	16.7169	Hörand et al. 1997:198 as ca. 32; Hörandl & Gutermann 1998:580; Dobeš & Vitek 2000:51
fal	Ranunculus pilisiensis Soó	32	4	Austria	Niederösterreich, Weinviertel, Zeiselberg NE Seebarn, SW-Seite (NE Kornneuburg): frischer Eichenmischwald, 210-250 m s. m., 7664/1	Gu22050	48.3818	16.397	Hörand et al. 1997:198; Hörandl & Gutermann 1998:580; Dobeš & Vitek 2000:51
fal	Ranunculus platycolpoides (Markl.) Ericsson	32	4	Finland	V, Turku, Ruissalo		60.4335	22.1645	Rousi 1956:8 as R. fallax ssp. platycolpoides
fal	Ranunculus pseudovertumnalis Haas, Ranunculus puberulus W.Koch, Ranunculus transiens (Vollm.) Borch.-Kolb, 1 Expl. unbestimmbar	32	4	Germany	Knutbübren (Niedersachsen, Landkreis Göttingen) / 4424; 3557200/5712100; 200 m hinter der Abzweigung von Knutbühren nach Elliehausen rechts am Straßenrand und Feldrand, offener Standort; Standort wird vermutlich gemäht. 295 m	Fundort 16	51.5405	9.82343	Lohwasser 2001:38, 67, 120
fal	Ranunculus puberulus W.Koch	32	4	Germany	Clausthal-Zellerfeld (Niedersachsen, Landkreis Goslar) / 4228; 3594050/5740750 / Unmittelbar vor Clausthal-Zellerfeld an der Abzweigung nach Goslar in einer Senke, große Wiesenpopulation, offener Standort. 595 m	Fundort 29	51.793	10.3621	Lohwasser 2001:38, 67, 128
fal	Ranunculus puberulus W.Koch, 1 Expl. unbestimmbar	32	4	Germany	Lippoldshausen (Niedersachsen, Landkreis Göttingen) / 4524; 3549500/5697550 / 300 m hinter Lippoldshausen in Richtung Hann. Münden, "Schluchtwald", halbschattiger und schattiger Standort. 140 m.	Fundort 9	51.4104	9.71041	Lohwasser 2001:38, 67, 116
fal	Ranunculus puberulus W.Koch, 2 Expl. unbestimmbar	32	4	Germany	Neuermark-Lübars (Sachsen-Anhalt, Landkreis Stendal) / Von Lübars in Richtung Elbfähre am Damm unter Hainbuchen halbschattiger und offener Standort. 30 m	Fundort 64	51.9616	11.9146	Lohwasser 2001:40, 67, 151
fal	Ranunculus puberulus W.Koch, Ranunculus rectus	32	4	Germany	Köpernitz (Brandenburg, Landkreis Ostprignitz-Ruppin) / Hinter dem Fußballplatz der Gaststätte in Köpernitz feuchte Wiese, offener Standort. 60 m	Fundort 78	53.0602	12.309	Lohwasser 2001:40, 67, 160
fal	Ranunculus puberulus W.Koch, Ranunculus transiens (Vollm.) Borch.-Kolb, 2 Expl. unbestimmbar	32	4	Germany	Sternhagen (Brandenburg, Landkreis Uckermark) / Im Ort im Straßengraben und auf der Wiese auf der rechten Seite in Richtung Prenzlau, offener Standort. 55 m	Fundort 102	53.242	13.8018	Lohwasser 2001:41, 67, 175
fal	Ranunculus puberulus W.Koch, Ranunculus transiens (Vollm.) Borch.-Kolb, 3 Expl. unbestimmbar	32	4	Germany	Blankensee (Brandenburg, Landkreis Uckermark) / Am Ortsausgang von Blankensee in Richtung Gerswalde rechts an der Böschung unter Sträuchern und kleinen Bäumen, halbschattiger Standort. 70 m	Fundort 93	53.399	13.2694	Lohwasser 2001:40, 67, 169
fal	Ranunculus rejdovae Májovský ined.	32	4	Slovakia	Slovenské rudohorie, Rejdová NW, 7287b		48.7986	20.2951	Májovský, Murín et al. 1987:34; Marhold et al. 2007:492	Murín & Májovský 1986, leg. Májovský & Murín
fal	Ranunculus ricottii-bodicensis Májovský ined.	48	6	Slovakia	Liptovská kotlina, Malatíny [Malatiná]		49.0671	19.4651	Májovský, Murín et al. 1987:38; Marhold et al. 2007:493	original published: Murín & Májovský in Májovský J. (1978) Index of chromosome numbers of Slovakian flora (Part 6). Acta Fac. Rer. Nat. Univ. Comen. Bot. 26:1-42. Leg.: Májovký et Murín
fal	Ranunculus ricottii-bodicensis Májovský ined.	48	6	Slovakia	V. Fatra, Liptovská kotlina, Bodice; 6983a		49.0578	19.5759	Májovský, Murín et al. 1987:38; Marhold et al. 2007:493	original published: Murín & Májovský in Májovský J. (1978) Index of chromosome numbers of Slovakian flora (Part 6). Acta Fac. Rer. Nat. Univ. Comen. Bot. 26:1-42. Leg.: Májovký et Murín
fal	Ranunculus ricottii-bodicensis Májovský ined.	48	6	Slovakia	Západné Beskydy, Oravský Podhora, settlement of Slaná voda, nearby the rivulet of Vonżovec, 750 m a. s. l., 6482d		49.5402	19.4234	Májovský, Murín et al. 1987:38; Marhold et al. 2007:493, location specified	Migra & Májovský, leg. Migra
fal	Ranunculus schurianus Soó	32	4	Slovakia	Javorníky, Veľký vrch hill, near the village of Divinka, in the beech forest, 440 m a. s. l., 6778a		49.253	18.6993	Marhold et al. 2007:491 from Mičieta 1981:100
fal	Ranunculus schurianus Soó	32	4	Slovakia	Šarišské vrchy, Fričovce, 6991d		49.0139	20.9661	Uhríková & Májovský in Löve 1980:725; Májovský & Murín 1987:39; Marhold et al. 2007:491	leg. Májovský et Dostál
fal	Ranunculus scotinus (Markl.) Ericsson	32	4	Finland	Åland		60.2043	19.8656	Rousi 1956:8 as R. fallax ssp. scotinus
fal	Ranunculus staubii Soó	32	4	Austria	Niederösterreich, Hainburger Berge, Königswarte, E-Flanke unter Ruine Pottenburg: versumpfter Waldrand, 200 m s. m., 7868/3	Gu22646	48.1147	17.0262	Hörand et al. 1997:198; Hörandl & Gutermann 1998:573; Dobeš & Vitek 2000:52
fal	Ranunculus stricticaulis W.Koch	40	5	Switzerland	Höngg, Zürich		47.4099	8.49945	Häflinger 1943:323, 325
fal	Ranunculus veterosoliensis Májovský ined.	32	4	Slovakia	Poľana, lov. Javorie, Zvolen, Bučina, 7480b		48.5616	19.1698	Májovský, Murín et al. 1987:38; Marhold et al. 2007:490	original published: Murín & Májovský in Májovský J. (1978) Index of chromosome numbers of Slovakian flora (Part 6). Acta Fac. Rer. Nat. Univ. Comen. Bot. 26:1-42. Leg.: Májovký et Murín
fal	Ranunculus vindobonensis Hörandl & Gutermann	32	4	Austria	Niederösterreich, Wienerwald, Laab im Walde, Waldrand 0,6 km NNE der Kirche: Eichenwaldsaum, 370 m s. m., 7863/1	Hö5594	48.1626	16.1683	Hörand et al. 1997:198; Hörandl & Gutermann 1998:588; Dobeš & Vitek 2000:53
fal	Ranunculus zmudae Jasiewicz	32	4	Poland	Szarów (Cariceto elongatae-Alnetum glutinosae); 50°1'/20°17'	Sz/298–301	50.0167	20.2833	Kalita in Jankun & Izmaiłow 1964:135 as Ranunculus cassubicus subsp. zmudae
fal	Ranunculus zmudae Jasiewicz	32	4	Poland	Szarów (Cariceto elongatae-Alnetum glutinosae); 50°1'/20°17'	Sz/169–170	50.0167	20.2833	Kalita in Jankun & Izmaiłow 1964:135 as Ranunculus cassubicus subsp. zmudae; Skalińska & al. 1964:48
?	Population unbestimmbar	32	4	Germany	Brüssow (Brandenburg, Landkreis Uckermark) / Hinter Brüssow in Richtung Carmzow nach ca. 5 km rechts im Straßengraben, offener Standort. 50 m	Fundort 109	53.3965	14.0885	Lohwasser 2001:41, 67, 179
?	Population unbestimmbar	32	4	Germany	Rothen-Klempenow (Mecklenburg-Vorpommern, Landkreis Uecker-Randow) / An der Straße von Rothen-Klempenow nach Dorotheenwalde kurz nach dem Ort in einer Rechtskurve links im Graben, offener und halbschattiger Standort. 8 m	Fundort 112	53.512	14.1993	Lohwasser 2001:41, 67, 181
?	Ranunculus abstrusus O.Schwarz, Ranunculus aemulans O.Schwarz, Ranunculus nicklesi (Engel) Borch.-Kolb (Engel) Borch.-Kolb (Engel) Borch.-Kolb, Ranunculus rotundatus Borch.-Kolb, 2 Expl. unbestimmbar	32	4	Germany	Ramin (Mecklenburg-Vorpommern, Landkreis Uecker-Randow) / Am Ortsausgang von Ramin in Richtung Retzin links im Mischwald, schattiger Standort. 15 m	Fundort 110	53.4139	14.2846	Lohwasser 2001:41, 67, 180
?	Ranunculus aemulans O.Schwarz, Ranunculus argoviensis W.Koch, Ranunculus puberulus W.Koch, Ranunculus rotundatus Borch.-Kolb	32	4	Germany	Weferlingen (Sachsen-Anhalt, Ohrekreis) / 3632; 4436350/5797100 / Ca. 500 m vor Weferlingen, aus Richtung Behnsdorf kommend, rechts im Wald (Ahorn, Hainbuche), schattiger Standort. 105 m	Fundort 48	52.3036	11.0654	Lohwasser 2001:39, 67, 140
?	Ranunculus aemulans O.Schwarz, Ranunculus basitruncatus Borch.-Kolb, Ranunculus haasii Soó, Ranunculus stricticaulis W.Koch	32	4	Germany	Annenwalde (Brandenburg, Landkreis Uckermark) / Zwischen Beutel und Annenwalde links Auwald und rechts feuchte Wiese, halbschattiger und offener Standort. 65 m	Fundort 89	53.1293	13.3669	Lohwasser 2001:40, 67, 167
?	Ranunculus aemulans O.Schwarz, Ranunculus biformis W.Koch, Ranunculus haasii Soó, Ranunculus puberulus W.Koch, 1 Expl. unbestimmbar	32	4	Germany	Zorge (Niedersachsen, Landkreis Osterode am Harz) / 4329; 3612700/5720550 / Am Ortsausgang von Zorge in Richtung Walkenried auf der rechten Seite im Straßengraben und dahinter im Wald, halbschattiger und schattiger Standort. 290 m	Fundort 25	51.6081	10.6258	Lohwasser 2001:38, 67, 126
?	Ranunculus aemulans O.Schwarz, Ranunculus biformis W.Koch, Ranunculus puberulus W.Koch, Ranunculus transiens (Vollm.) Borch.-Kolb, 1 Expl. unbestimmbar	32	4	Germany	Bahnhof Borkenfriede (Mecklenburg-Vorpommern, Landkreis Ostvorpommern) / An der B 109 in Höhe des Bahnhofs Borkenfriede am Straßenrand und im Straßengraben auf der Bahnhofsseite an einer Crataegus-Hecke, offener Standort. 10 m	Fundort 122	53.716	13.8336	Lohwasser 2001:41, 67, 187	coordinates not applicable
?	Ranunculus aemulans O.Schwarz, Ranunculus biformis W.Koch, Ranunculus rotundatus Borch.-Kolb, 2 Expl. unbestimmbar	32	4	Germany	Langelsheim (Niedersachsen, Landkreis Goslar) / 4027; 3590750/5755900 / Am Ortsausgang von Langeisheim in Richtung Innerste-Talsperre auf der linken Seite in kleinem Wäldchen (Kirsche - Ahorn - Hainbuche), schattiger Standort. 215m	Fundort 34	51.9296	10.3183	Lohwasser 2001:39, 67, 131
?	Ranunculus aemulans O.Schwarz, Ranunculus haasii Soó, Ranunculus indecorus W.Koch, Ranunculus puberulus W.Koch, 1 Expl. unbestimmbar	32	4	Germany	Wülperode (Sachsen-Anhalt, Landkreis Halberstadt) / 4029; 3609500/5761550 / Straßenrand in Wülperode am Friedhof unter Ahorn, halbschattiger Standort. 115 m	Fundort 38	51.977	10.5926	Lohwasser 2001:39, 67, 134
?	Ranunculus aemulans O.Schwarz, Ranunculus haasii Soó, Ranunculus indecorus W.Koch, Ranunculus puberulus W.Koch, 1 Expl. unbestimmbar	32	4	Germany	Neutornow (Brandenburg, Landkreis Oberhavel) / An der Straße Tornow in Richtung Blumenow an der Abzweigung Neubau und Neutomow, Wiese, offener Standort. 60 m	Fundort 88	53.086	13.2647	Lohwasser 2001:40, 67, 166
?	Ranunculus aemulans O.Schwarz, Ranunculus haasii Soó, Ranunculus integerrimus (Julin) Borch.-Kolb, Ranunculus puberulus W.Koch, 1 Expl. unbestimmbar	32	4	Germany	Linche[n]shöh (Mecklenburg-Vorpommern, Landkreis Uecker-Randow) / Hinter Strasburg in Richtung Linche[n]shöh auf der linken Seite im feuchten Straßengraben unter einer Hainbuchenallee, offener und halbschattiger Standort. 60 m	Fundort 116	53.5025	13.7559	Lohwasser 2001:41, 67, 183
?	Ranunculus aemulans O.Schwarz, Ranunculus indecorus W.Koch, Ranunculus puberulus W.Koch	32	4	Germany	Tornow (Brandenburg, Landkreis Oberhavel) / Am Ortsausgang von Tornow in Richtung Blumenow links feuchte Wiese und Pappelwald, offener und schattiger Standort. 50 m	Fundort 87	53.0645	13.2859	Lohwasser 2001:40, 67, 166
?	Ranunculus aemulans O.Schwarz, Ranunculus monacensis Borch.-Kolb, Ranunculus puberulus W.Koch, 1 Expl. unbestimmbar	32	4	Germany	Jühnde (Niedersachsen, Landkreis Göttingen) / 4524; 3555350/5704000 / Ehrenhain (und Wiese) auf der rechten Seite ca. 1 km vor Jühnde aus Richtung Hoher Hagen kommend, offener, halbschattiger und schattiger Standort; Standort wird gemäht. 345 m.	Fundort 10	51.4679	9.79549	Lohwasser 2001:38, 67, 116
?	Ranunculus aemulans O.Schwarz, Ranunculus multisectus Haas, Ranunculus puberulus W.Koch, Ranunculus rotundatus Borch.-Kolb, 2 Expl. unbestimmbar	32	4	Germany	Lüttenhagen II (Mecklenburg-Vorpommern, Landkreis Mecklenburg-Strelitz) / Am Ortsausgang von Lüttenhagen in Richtung Feldberg nach ca. 300 m links im Straßengraben, halbschattiger Standort. 125 m	Fundort 98	53.337	13.389	Lohwasser 2001:41, 67, 172
?	Ranunculus aemulans O.Schwarz, Ranunculus puberulus W.Koch, 1 Expl. unbestimmbar	32	4	Germany	Siebertal (Niedersachsen, Landkreis Osterode am Harz) / 4328; 3595600/5728100 / Ca. 3 km nach Herzberg und ca. 500 m vor dem Hotel Paradies rechts und links der Straße, Wiese, Straßenrand, Waldrand, halbschattiger und offener Standort. 290 m	Fundort 27	51.6791	10.3811	Lohwasser 2001:38, 67, 127
?	Ranunculus aemulans O.Schwarz, Ranunculus puberulus W.Koch, 2 Expl. unbestimmbar	32	4	Germany	Hornburg (Niedersachsen, Landkreis Wolfenbüttel) / 3929; 3612400/5767050 / An der Straße von Osterode nach Hornburg kurz nach der Abzweigung nach Rhäden auf der rechten Seite im Straßengraben und am Ackerrand, offener Standort. 90 m	Fundort 39	52.0259	10.6366	Lohwasser 2001:39, 67, 135
?	Ranunculus aemulans O.Schwarz, Ranunculus rotundatus Borch.-Kolb, Ranunculus stricticaulis W.Koch	32	4	Germany	Dannenwalde (Brandenburg, Landkreis Oberhavel) / Hinter Dannenwalde in Richtung Gransee, kurz vor der Abzweigung nach Seilershof, links feuchter Wald (Pappeln), schattiger und halbschattiger Standort. 50 m	Fundort 86	53.074	13.1813	Lohwasser 2001:40, 67, 165
?	Ranunculus aemulans O.Schwarz, Ranunculus rotundatus Borch.-Kolb, Ranunculus transiens (Vollm.) Borch.-Kolb, Ranunculus vertumnalis O.Schwarz, 4 Expl. unbestimmbar	32	4	Germany	Prenzlau Park (Brandenburg, Landkreis Uckermark) / Im Stadtpark an der alten Stadtmauer über die Wiese verstreut, offener und halbschattiger Standort. 60 m	Fundort 104	53.8643	13.3132	Lohwasser 2001:41, 67, 176
?	Ranunculus argoviensis W.Koch, Ranunculus biformis W.Koch, Ranunculus puberulus W.Koch, 2 Expl. unbestimmbar	32	4	Germany	Schildau bei Seesen II (Niedersachsen, Landkreis Goslar) / 4027; 3581900/5753600 / Nach der Abzweigung zur Winkelsmühle/Schildau erster Weg rechts unter zwei verschiedenen Büschen, halbschattiger Standort. 180 m	Fundort 33	51.9104	10.1891	Lohwasser 2001:39, 67, 131
?	Ranunculus argoviensis W.Koch, Ranunculus indecorus W.Koch, Ranunculus integerrimus (Julin) Borch.-Kolb, Ranunculus phragmiteti, Ranunculus puberulus W.Koch	32	4	Germany	Warnau (Sachsen-Anhalt, Landkreis Stendal) / Wiese vor Warnau auf der rechten Seite, offener Standort. 25 m	Fundort 65	52.742	12.1833	Lohwasser 2001:40, 67, 152
?	Ranunculus argoviensis W.Koch, Ranunculus rotundatus Borch.-Kolb, Ranunculus stricticaulis W.Koch, 1 Expl. unbestimmbar	32	4	Germany	Rothemühl (Mecklenburg-Vorpommern, Landkreis Uecker-Randow) / Ca. 1 km hinter Rothemühl in Richtung Strasburg rechts im Wald (Pappel, Hainbuche), schattiger Standort. 30 m	Fundort 120	53.5794	13.8122	Lohwasser 2001:41, 67, 186
?	Ranunculus argoviensis W.Koch, Ranunculus vertumnalis O.Schwarz, 1 Expl. unbestimmbar	32	4	Germany	Flechtingen (Sachsen-Anhalt, Ohrekreis) / 3633; 4447700/5799700 / Im Schlosspark des Wasserschlosses am Eingang aus Richtung Klinik, Hainbuchenwald mit Jungwuchs, schattiger Standort. 100 m	Fundort 50	52.3282	11.2313	Lohwasser 2001:39, 67, 141
?	Ranunculus auricomus s.l.	32	4	Belarus	Minskaya Obl., Minskij R-n, 2 km k V ot D. Vendselevo, po kraju el'nika kislichnogo	1779	54.0515	27.1786	Dmitrieva 2002:132	leg. Dmitrieva
?	Ranunculus auricomus s.l.	32	4	Belarus	Mogilevskaya Obl., Osipovitzski R-n, 1 km k Juv ot d. Lipen', zlakovo-raznotravnyj tsenoz pod odinochnym dybom	2119	53.4032	28.8227	Dmitrieva 2002:132	leg. Dimitrieva, Tret'jakov
?	Ranunculus auricomus s.l.	32	4	Belarus	Mogilevskaya Obl., Osipovitzskij R-n, 1 km k V ot d. Lipen', britsalovichskoje lesnichestvo, kv. 1	2124	53.4115	28.8395	Dmitrieva 2002:132	leg. Dimitrieva, Tret'jakov
?	Ranunculus auricomus s.l.	32	4	Poland	Tatra		49.2547	19.9663	Häflinger 1943:323, 325 als R. polonicus W.Koch ined.	1954b (R.megacarpus als «Cfol. 1, tetraploide Rasse» bezeichnet), Rutishauser 1965, der F1 vgl.
?	Ranunculus auricomus s.l.	32	4	Finland	N., H:ki; Ruskeasuo		60.1989	24.8978	Sorsa 1962:10	n = 16
?	Ranunculus auricomus s.l.	32	4	Finland	N., H:ki; Laajasalo		60.172	25.0433	Sorsa 1962:10	n = 16
?	Ranunculus auricomus s.l.	32	4	Norway	Gaustad, Oslo		59.9456	10.7101	Laane 1969:145
?	Ranunculus auricomus s.l.	32	4	Slovakia	Spiš. kotl., between the villages of Spišské Vlachy and Slatina, 7090d		48.9447	20.7982	Mártonfiová in Marhold et al. 2007:492
?	Ranunculus auricomus s.l.	32	4	Sweden	spontan Bergianischer Garten		59.3692	18.0464	Langlet 1932:393
?	Ranunculus biformis W.Koch, Ranunculus rotundatus Borch.-Kolb, Ranunculus suevicus Borch.-Kolb, 2 Expl. unbestimmbar	32	4	Germany	Elm-Lappwald (Niedersachsen, Landkreis Helmstedt) / 3731; 4425550/5793850 / An der Straße von Rennau nach Süpplingenburg auf der rechten Seite nach BAB-Brücke, kurz nach dem links der Wald aufgehört hat, am Rand eines Buchenwaldes und im Straßengraben, halbschattiger und offener Standort. 135 m	Fundort 46	52.2731	10.9078	Lohwasser 2001:39, 67, 139
?	Ranunculus fatrensis Májovský ined.	32	4	Slovakia	Stráż. vrvhy, Lietavská Lúčka, Drieňovica, edge of forest, 6878a		49.1747	18.7226	Marhold et al. 2007:492 from Hallonová 1992:322
?	Ranunculus haasii Soó, Ranunculus puberulus W.Koch, Ranunculus rectus, Ranunculus stricticaulis W.Koch	32	4	Germany	Teschendorf II (Brandenburg, Landkreis Oberhavel) / Unmittelbar hinter dem Ortsausgang von Teschendorf in Richtung Löwenberg (B 96) rechts und links der Straße feuchte Wiese und Weide offener Standort. 40 m	Fundort 80	52.8624	13.165	Lohwasser 2001:40, 67, 161
?	Ranunculus haasii Soó, Ranunculus puberulus W.Koch, Ranunculus rotundatus Borch.-Kolb, Ranunculus stricticaulis W.Koch, 2 Expl. unbestimmbar	32	4	Germany	Carmzow (Brandenburg, Landkreis Uckermark) / Wiese vor dem Friedhof und auf dem Friedhof, offener Standort. 50 m	Fundort 108	53.3868	14.049	Lohwasser 2001:41, 67, 178
?	Ranunculus haasii Soó, Ranunculus rotundatus Borch.-Kolb, Ranunculus stricticaulis W.Koch, Ranunculus suevicus Borch.-Kolb	32	4	Germany	Gransee (Brandenburg, Landkreis Oberhavel) / Am Ortsausgang von Gransee in Richtung Rheinsberg rechts feuchter Wald und feuchte Wiese, offener und halbschattiger Standort. 50 m	Fundort 82	53.0085	13.1336	Lohwasser 2001:40, 67, 163
?	Ranunculus kopaninae Májovský ined.	32	4	Slovakia	Bukovké vrchy, Ruský Potok, site "Kopanina", 69100c		49.0289	22.4056	Marhold et al. 2007:490 from Murín in Majovský et al. 1978:33
?	Ranunculus phragmiteti, Ranunculus puberulus W.Koch, Ranunculus rotundatus Borch.-Kolb, Ranunculus stricticaulis W.Koch	32	4	Germany	Zabelsdorf (Brandenburg, Landkreis Oberhavel) / Am Ortsausgang von Zabelsdorf in Richtung Marienthal auf der linken Seite feuchte Wiese, offener Standort. 50 m	Fundort 85	53.0485	13.2568	Lohwasser 2001:40, 67, 165
?	Ranunculus presoviensis Májovský ined.	32	4	Slovakia	Slan. vrchy, Prešov, village of Kapušany; 6993d		49.0439	21.3344	Marhold et al. 2007:490 from Murín in Majovský et al. 1978:34
?	Ranunculus pseudovertumnalis Haas, Ranunculus puberulus W.Koch, Ranunculus rotundatus Borch.-Kolb, 4 Expl. unbestimmbar	32	4	Germany	Mewegen (Mecklenburg-Vorpommern, Landkreis Uecker-Randow) / Von Pampow in Richtung Mewegen ca. 500 m vor dem Ortsschild von Mewegen rechts feuchte Wiese, offener Standort. 20 m	Fundort 113	53.5235	14.2575	Lohwasser 2001:41, 67, 181
?	Ranunculus rotundatus Borch.-Kolb, Ranunculus stricticaulis W.Koch	32	4	Germany	Kläden (Sachsen-Anhalt, Landkreis Stendal) / An der Straße von Kläden nach Uchtspringe kurz hinter dem Ortsausgang von Kläden am Wassergraben vor kleiner Brücke und unter Bäumen (Ahorn, Eichen, Erlen), halbschattiger Standort. 40 m	Fundort 58	52.6272	11.6497	Lohwasser 2001:39, 67, 147
?	Ranunculus rotundatus Borch.-Kolb, Ranunculus stricticaulis W.Koch	32	4	Germany	Falkenthal (Brandenburg, Landkreis Oberhavel) / Unmittelbar nach der Abzweigung von der B 167 nach Zehdenick kurz vor Falkenthal rechts im Straßengraben, offener Standort. 45 m	Fundort 81	52.9012	13.2913	Lohwasser 2001:40, 67, 162
?	Ranunculus rotundatus Borch.-Kolb, Ranunculus stricticaulis W.Koch	32	4	Germany	Wolfsruh (Brandenburg, Landkreis Oberhavel) / An der Straße zwischen Menz und Gransee, ca. 1 km nach der Abzweigung Wolfsruh, links im Straßengraben, dahinter Felder, und rechts am Waldrand, offener und halbschattiger Standort. 60 m	Fundort 83	53.0632	13.1158	Lohwasser 2001:40, 67, 163
?	Ranunculus rotundatus Borch.-Kolb, Ranunculus stricticaulis W.Koch	32	4	Germany	Badingen (Brandenburg, Landkreis Oberhavel) / Zwischen Gransee und Zehdenick kurz nach dem Flugplatz rechts im Straßengraben unter Eschen, halbschattiger Standort. 50 m	Fundort 84	53.0003	13.208	Lohwasser 2001:40, 67, 164
?	Ranunculus rotundatus Borch.-Kolb, Ranunculus stricticaulis W.Koch, 1 Expl. unbestimmbar	32	4	Germany	Kremmen (Brandenburg, Landkreis Oberhavel) / Wiese im Ort, offener Standort. 35 m	Fundort 76	52.9912	13.0286	Lohwasser 2001:40, 67, 159
?	Ranunculus rotundatus Borch.-Kolb, Ranunculus stricticaulis W.Koch, 2 Expl. unbestimmbar	32	4	Germany	Waisenkrug (Brandenburg, Landkreis Ostprignitz-Ruppin) / Ca. 1 km vor Starbeck in Richtung Neuruppin bei einem einsamen Hof gegenüber auf der Wiese und an der Böschung, offener Standort. 50 m	Fundort 74	52.9584	12.799	Lohwasser 2001:40, 67, 158
?	Ranunculus rotundatus Borch.-Kolb, Ranunculus stricticaulis W.Koch, Ranunculus suevicus Borch.-Kolb, 1 Expl. unbestimmbar	32	4	Germany	Walsleben (Brandenburg, Landkreis Ostprignitz-Ruppin) / Gegenüber von dem Gemeindebüro Walsleben, feuchte Wiese, offener Standort. 45 m	Fundort 73	52.9399	12.6688	Lohwasser 2001:40, 67, 157
?	Ranunculus somsakii Májovský ined.	24	3	Slovakia	Sl. rudohorie, Rejdová, 7287b		48.7986	20.2951	Marhold et al. 2007:490 from Murín in Majovský et al. 1978:34

## Sheet: References
Literature reviewd
Baltisberger M (2006) Cytological investigations on Bulgarian phanerogams. Willdenowia 36:205-216.
Böcher TW (1938) Cytological studies in the Genus Ranunculus. Dansk Bot Ark 9:1-33.
Bruun HG (1932) Cytological Studies in Primula. Symb Bot Upsal 1:1-329.
Dimitrieva SA (2002) Chromosome numbers of Ranunculaceae species of the byelorussian flora. Bot. Zhurn. 87:131-133.
Diosdado JC, Pastor JE (1996) Consideraciones citotaxonómicas del Género Ranunculus L. (Ranunculaceae) en la Península Ibérica. Anales Jard Bot Madrid 54:66-78.
Dobeš C, Vitek E (eds.) (2000) Documented chromosome number checklist of Austrian ascular plants. Vienna: Museum of Natural History Vienna.
D'Ovidio R, Masci SM, Marchi P, Visona L (1985) Evoluzione e cariotipo nel genere Ranunculus L. Atti Soc Tosc Sci Nat Pisa Mem 92:299-309.
Ericsson S (1992) The microspecies of the Ranunculus auricomus complex treated at the species level. Ann Bot Fennici 29:123-158.
Ericsson S (1995) Några taxonomiska notiser om majsmörblonmor. Svensk Bot Tidskr 89:19-31.
Ericsson S (2001) Microspecies within the Ranunculus auricomus complex. In: Jonsell B (ed) Flora Nordica 2. S Bergius Foundation & Royal Swedish Academy of Science, Stockholm: 382-397.
Erst AS, Broshkov AD (2010) Chromosome numbers of some species of the family Ranunculaceae Juss. from Siberia. Turczaninowia 13:152-153.
Fagerström L, Kvist G (1980) Vier nordische Taxa des Ranunculus auricomus-Komplexes. Ann Bot Fennici 17:296-306.
Gadella TWJ, Kliphuis E (1968) Chromosome numbers of flowering plants in the Netherlands, IV. Proc Kon Ned Akad Wetensch C 71:168-183.
Gadella TWJ, Kliphuis E (1973) Chromosome numbers of flowering plants in the Netherlands, VI. Proc. Kon Ned Akad Wetensch C 76:303-311.
Gregor T, Hand R (2007) Chromosomenzahlen von Farn- und Samenpflanzen aus Deutschland 2. Kochia 2:31-35
Häfliger E (1943) Zytologischembryologische Untersuchungen pseudogamer Ranunkeln der Auricomus-Gruppe. Ber Schweiz Bot Ges 53:317-379.
Hollingsworth PM, Gornall RJ, Bailey JP (1992) Contribution to a cytological catalogue of the British and Irish flora, 2. Watsonia 19:134-137.
Hörandl E, Dobeš C, Lambrou M (1997) Chromosomen- und Pollenuntersuchungen an österreichischen Arten des apomiktischen Ranunculus auricomus-Komplexes. Bot Helv 107:195-209.
Hörandl E (2002) Morphological differentiation within the Ranunculus cassubicus group. Pl Syst Evol 233: 65-78.
Hörandl E, Greilhuber J (2002) Diploid and autotetraploid sexuals and their relationships to apomicts in the Ranunculus cassubicus group: insights from DNA content and isozyme variation. Pl Syst Evol 234:85-100.
Hörandl E, Greilhuber J, Dobeš C (2000) Isozyme Variation and Ploidy Levels within the Apomictic Ranunculus auricomus Complex: Evidence for a Sexual Progenitor Species in Southeastern Austria. Pl Biol 2:53-62.
Hörandl E, Greilhuber JH, Klímova K, Paun O, Temsch E, Emadzade K, Hodálová I (2009) Reticulate evolution and taxonomic concepts in the Ranunculus auricomus complex (Ranunculaceae): insights from analysis of morphological, karyological and molecular data. Taxon 16:1194-1215.
Hörandl E, Gutermann W (1998) Der Ranunculus auricomus-Komplex in Österreich und benachbarten Gebieten 2. Die Arten der R. cassubicus-, R. monophyllus- und R. fallax-Sammelgruppe. Bot Jahrb Syst 120:545-598.
Hörandl E, Gutermann W (1998) Zur Kenntnis des Ranunculus auricomus-Komplexes in Österreich: Die Arten der R. phragmiteti- und R. indecorus-Gruppe. Phyton (Horn) 37:263-320
Hörandl E, Gutermann W (1999) Der Ranunculus auricomus-Komplex in Österreich und benachbarten Gebieten 3. Die Arten der R. latisectus-, R. puberulus-, R. stricticaulis- und R. argoviensis-Gruppe (R. auricomus-Sammelgruppe). Bot Jahrb Syst 121:99-138.
Hörandl E, Jakubowski G, Dobeš C (2001) Isozyme and morphological diversity within apomictic and sexual taxa of the Ranunculus auricomus complex. Pl Syst Evol 226:165-185.
Izmaiłow R (1976) Problem of apomixis in the Ranunculus auricomus group. Acta Biol Cracov Ser Bot 19:15-28.
Izmailow R 1966. Macrosporogenesis in apomictic species Ranunculus cassubicus. Acta Biol Cracov Ser Bot 8:183-195.
Jankun A, Izmaiłow R (1964) Badania cytotaksonomiczne nad polimorficznym gatunkiem Ranunculus cassubicus L. - Cytotaxonomical studies in the polymorphic species Ranunculus cassubicus L. Acta Biol Cracov Ser Bot 7:131-152.
Jankun A. 1966. Studies of meiosis in various chromosomic types of Ranunculus cassubicus. L. Acta Biol Cracov Ser Bot 8:171-181.
Julin E, Nannfeldt JA (1966) Der Formenkreis des Ranunculus auricomus L. in Schweden. III. Sippen von R. auricomus s. str. aus Uppland. Ark. Bot. 6:163-241, pl. I-XXXII.
Kočková L (2009) Obsah DNA a AT/GC genomový poměr v čeledi Ranunculaceae. Brno: Bakalářská práce Masarykova univerzita.
Laane MM (1969) Meiosis and structural hybridity in some Norvegion plant species. Blyttia 27:151-173.
Langlet O (1927) Beiträge zur Zytologie der Ranunculazeen. Svensk Bot Tidskr 21:1-17.
Langlet O (1932) Über Chromosomenverhaltnisse und Systematik der Ranunculaceae. Svensk Bot Tidskr 26:381-400.
Larter LNH (1932) Chromosome Variation and Behaviour in Ranunculus L. J Genetics 26:255-283.
Lohwasser U (2001) Biosystematische Untersuchungen an Ranunculus auricomus L. (Ranunculaceae) in Deutschland. Diss. Bot. 343:1-220.
Löve À (1978) IOPB chromosomoe number reports LXI. Taxon 27:375-392
Löve Á (1980) IOPB chromosome number reports. LXIX. Taxon 29:725-726.
Löve Á, Löve D (1956) Cytotaxonomical conspectus of the Icelandic flora. Acta Horti Gotob 20:65-291.
Májovský J, Uhríková A (1982) Karyotaxonomisches Studium einiger Arten der Flora der Slowakei. Acta Fac Rer Nat Univ Comen Bot 29:97-102.
Májovský J, Murín A et al. (1987) Karyotaxonomický prehľad Flóry Slovenska. Bratislava: Veda Vydavateľstvo Slovenskej Akadémie vied.
Májovský J. et al. (1974) Index of chromosome numbers of Slovakian flora (Part 3). Acta Fac Rer Nat Univ Comen Bot 22:1-20
Májovský J. et al. (1974) Index of chromosome numbers of Slovakian flora (Part 4). Acta Fac Rer Nat Univ Comen Bot 23:1-23.
Májovský J. et al. (1976) Index of chromosome numbers of Slovakian flora (Part 5). Acta Fac Rer Nat Univ Comen Bot 25:1-18.
Májovský J. et al. (1978) Index of chromosome numbers of Slovakian flora (Part 6). Acta Fac Rer Nat Univ Comen Bot 26:1-42.
Marchi P (1971) Numeri chromosomici per la flora italiana. 57-66. Inf Bot Ital 3:124-138.
Marchi P, Visonà L (1982) Numeri chromosomici per la Flora Italiana: 889-905. Inf Bot Ital 14:248-258.
Marhold K, Mártonfi P., Mereďa jun P, Mráz P (2007) Chromosome number survey of the ferns and flowering plants of Slovakia. Bratislava: VEDA.
Masci S, Miho A, Marchi P (1994) Ranunculus auricomus L. aggr. (Ranunculaceae) in Italy. I. Sexual tetraploids on the Appenines. Caryologia 47:97-108.
Masci SM, Marchi P, Visonà L (1971) Numeri chromosomici per la flora italiana. 1098-1105. Inf Bot Ital 19:167-172.
Masci S, Miho A, Marchi P (1991) Studio sulla variabilità delle entità appenniniche di Ranunculus auricomus L. (aggr.). Giorn Bot It 125:241
Melzheimer G, Melzheimer V, Damboldt J (1976) Die Ranunculus auricomus-Sippen West-Berlins. Bot Jahrb Syst 95:339-372.
Měsíček J, Javůrková-Jarolímová V (1992) List of chromosome numbers of the Czech vascular plants. Praha: Academia.
Miho A, Masci SM, Marchi P, Visona L (1986) Ricerche sui popolamenti Centro-appenninici di Ranunculus auricomus L. s.l. Giorn Bot It 120:176.
Miho A (1985) Variabilità cariotipica in Ranunculus auricomus L. s.l. (Ranunculaceae). -- Tesi di Laurea. Facoltà di Scienze Mat. Fis. e Nat., Università "La Sapienza", Roma.
Mládenkova K (2005) Príspevok k taxonomickému štúdiu agregátu Ranunculus auricomus na Slovensku (Contribution to the taxonomic study of the Ranunculus auricomus complex in Slovakia). M.Sc. Thesis, University of Bratislava, Bratislava. [In Slovak]
Montgomery L, Khalaf M, Bailey P, Gornall RJ (1997) Contributions to a cytological catalogue if the British and Irish flora, 5. Watsonia 21:365-368.
Murín A, Májovský J (1987 "1986") Karyologica study of Slovakian flora XIX. Acta Fac Rer Nat Univ Comen Bot 34:3-20.
Murin A, Haberova I, Zamsran C (1980) Karyological studies of some species of the Mongolian flora. Folia Geobot Phytotax 15:395-405.
Nogler GA (1971) Genetik der Aposporie bei Ranunculus auricomus s. l. W. Koch. I. Embryologie. Ber Schweiz Bot Ges 81:139-179.
Nogler GA (1982) How to obtain diploid apomictic Ranunculus auricomus plants not found in the wild state. Ber Schweiz Bot Ges 92:13-22.
Nogler GA (1984) Genetics of apospory in apomictic Ranunculus aucicomus. V. Conclusion. Bot Helv 94:411-423.
Nogler GA 1975. Genetics of apospory in Ranunculus auricomus. IV. Embryology of F3 and F4 backcross offspring. Phytomorphology 25:485-490.
Nogler GA 1978a. Zur Zytogenetik der Apomixie bei Ranunculus auricomus. Habilitationsschrift ETH Zürich, 916 704:218 H.
Nogler GA 1978b. Diploid apomicts in Ranunculus auricomus. Proc. XIV Int. Congr. Genet., Moscow 1978, Contributed Paper Sessions Abstracts, Part II: 181.
Parfenov VI, Dmitrieva SA (1987) Kariologicheskaja kharakteristika predstavitelej flory sosudistykh rastenij Beresinskogo Biosfernogo Sapovednika (soovshchenie vtoroe). Sapov Belorussk 11:62-69
Paun O, Greilhuber J, Temsch E, Hörandl E (2006a) Patterns, sources and ecological implications of clonal diversity in apomicitic Ranunculus carpaticola (Ranunculus auricomus complex, Ranunculaceae). Molec Ecol 15:897-910.
Paun O., Stuessy TF, Hörandl E (2006b) The role of hybridization, polyploidization and glaciation in the origin and evolution of the apomictic Ranunculus cassubicus complex. New Phytol 171:223-236.
Pólya L (1950) Magyaroragi növényfajok kromosomaszámai II. Ann Biol Univ Debrecen 1:46-56.
Rousi A (1956) Cytotaxonomy and reproduction in the apomictic Ranunculus auricomus group. Ann Bot Soc Zool-Bot Fenn "Vanamo" 29:1-64, Pl. I.
Rutishauser A (1954) Die Entwicklungserregung des Endosperms bei pseudogamen Ranunculusarten. Mitt. Naturforsch Ges Schaffhausen 25:1-45.
Rutishauser A 1954 Die Entwicklungserregung der Eizelle bei pseudogamen Arten der Gattung Ranunculus. Bull Schweiz Akad Med Wiss 10:491-512.
Rutishauser A 1967. Fortpflanzungsmodus und Meiose apomiktischer Blütenpflanzen. Protoplasmatologia VI. F.3. Wien, New York.
Semerenko LV (1985) Chromosome numbers in some species of flowering plants of the Byelorussian flora. Bot Zhurn 70:993-994.
Sgorbati S, Masci SM, Soler V, Marchi P (1989) Rapid cytofluorimetric determination of leaf nuclear DNA content in the polyploid series (R. auricomus agg., Ranunculaceae). Pl Syst Evol 167:219-226.
Skalińska M, Piotrowicz M, Sokołowska-Kulczycka et al. (1961) Further additions to chromosome numbers of Polish angiosperms. Acta Soc Bot Pol 30:463-489.
Skalińska M. et al. (1964) Additions to chromosome numbers of Polish Angiosperms (Fifth contribution). Acta Soc Bot Pol 33:45-76.
Sokolowskaja AP (1968) A karyological investigation of the flora of the Koriakian Land. Bot Zhurn 53: 99-105.
Sokolowskaja, A.P. (1963) Geografitzeskoe Rasprostranenie Polyploidix Vidov rastenij. Vestnik Leningradskogo Un-ta Ser. Biol. 3:38-52.
Soó R (1964) Die Ranunculus auricomus L. emend. Korsh. Artengruppe in der Flora Ungarns und der Karpaten. I. Acta Bot Acad Sci Hung 10:221-237.
Sorsa V (1962) Chromosomenzahlen finnischer Kormophyten I. Ann Acad Sci Fenn Ser A IV Biol 58:1-14.
Spinosi K (1998) Ordinamento biosistematic e tassonomico delle entità centroappenniniche segregate di Ranunculus auricomus L. aggr. (Ranunculaceae). Dissertazione all´Universitá degli Studi di Roma „La Sapienza“, Roma 1998.
Takhtajan AL (1993) Numeri chromosomatum Magnoliophytorum florae URSS. St. Peterburg (Petropoli): Nauka.
Vuillemin F (1989) Observations cytologiques et morphologiques sur Ranunculus auricomus L. s. l. dans le canton de Neuchâtel. Bull Soc Neuchâteloise Sci Nat 112:19-28.
Vuillemin F (1990) Index des nombres chromosomiques des Spermatophytes de la Suisse : 4. Distribution des cytodème du Ranunculus auricomus L. s.l. Bot Helv 100:207-223.
